# Supplementary material for: TCF1 controls Treg functions that regulate inflammation, CD8 T-cell cytotoxicity, and severity of colon cancer
Source: Research Square preprint supplement (doi:10.21203/rs.3.rs-136816/v1), 2021-01-13
Supplement: Supplementary file 1 [file 161240720c596650b1f89a81.xlsx]

## Sheet: a
Table S1a. Expression of all genes in TCF deficient and sufficient Tregs related to Figure 1a. (shown are RPKM values)
Gene	WT_rep1	WT_rep2	WT_rep3	TCF_rep1	TCF_rep2	TCF_rep3
Lef1	27.5923	29.1076	28.2636	81.4111	80.6221	80.1463
Trp53	21.3495	19.7134	19.7817	55.6083	56.5123	56.202
Myc	14.7817	13.3598	14.3042	35.9537	36.377	36.0412
Chd8	26.5835	28.1325	25.5886	46.5697	46.3571	46.4142
Nfatc1	19.4997	19.0199	16.5507	37.0464	37.5294	37.0236
Rac2	228.038	230.655	226.012	314.274	317.368	313.904
Plcb2	18.9668	19.6687	18.0369	29.7408	29.5393	29.8757
Jun	58.7618	45.1089	51.9666	101.191	100.816	100.925
Lrp5	0.239867	0.264465	0.213612	0.992039	0.918733	1.02322
Nfatc2	5.95818	6.46111	5.13183	11.2565	10.9994	11.2336
Prickle3	8.61009	8.67334	8.95635	13.8128	13.804	13.721
Ccnd3	41.4808	40.1873	37.5395	59.2531	59.9828	59.0739
Smad3	15.0854	14.3928	12.0736	24.6362	24.7198	24.642
Nfatc3	33.6366	33.0927	31.2924	45.2923	45.3123	45.1964
Prkaca	9.39922	9.05116	8.27377	14.3591	14.167	14.1965
Dvl3	1.29609	1.2785	1.26269	2.6643	2.66474	2.54693
Csnk2b	56.7456	59.9899	60.8854	80.809	81.848	80.4761
Camk2b	1.39169	0.49585	0.677983	3.66842	3.7799	3.71393
Ep300	13.6123	14.229	11.608	20.2168	20.1203	20.0711
Gsk3b	8.1934	8.82032	7.08905	12.4206	12.1424	12.6777
Csnk1e	4.2818	4.02973	4.15684	6.54504	5.99891	6.58699
Psen1	23.1039	24.9472	20.5483	33.2673	33.2217	33.3292
Frat1	5.51338	5.4675	6.13654	8.36582	8.30844	8.20871
Crebbp	17.6485	19.0264	12.6456	28.9757	28.8273	28.8964
Dvl2	7.19878	6.57531	6.78982	9.31535	9.35452	9.4158
Vangl2	0.280307	0.34857	0.146655	0.941334	0.974157	0.92415
Ppp3ca	14.1321	14.9422	12.9521	18.7477	18.7382	19.0223
Csnk2a2	3.37801	3.63035	3.53751	5.12813	4.81565	4.99734
Ppp3r1	22.6912	24.0515	25.316	30.926	31.4618	30.3192
Ctbp1	51.6674	48.2764	40.8817	66.6171	66.5786	66.7333
Rac1	77.6495	77.3196	73.4399	92.0963	94.2895	92.3032
Ppard	1.4986	0.987436	0.929194	2.33275	2.18036	2.27397
Tgfb1	7.55059	7.0967	6.84514	17.6009	16.7178	17.8493
Gata3	6.26693	5.21521	4.9092	15.4439	15.7618	15.6038
Jak3	24.0691	19.1293	17.967	60.9908	61.0033	60.7564
Foxp3	27.7035	26.2077	20.3089	77.8034	77.1597	77.9027
Runx1	6.98508	7.42449	6.98227	12.795	13.0635	12.8446
Rara	7.5866	7.1522	5.79245	18.11	18.007	17.933
Rela	21.25	19.4778	19.0149	34.8854	35.1609	35.1863
Il2ra	60.7077	65.6376	59.6735	101.137	100.748	100.783
Fos	24.2027	15.0903	18.2604	57.4202	56.904	57.3917
Il2rg	162.223	180.694	182.697	279.626	276.996	279.463
Cd3e	88.0681	92.3113	90.2449	126.362	125.116	125.476
Nfkbie	15.3773	14.3589	13.7598	22.5157	22.5479	22.0375
Il21r	59.7261	51.0361	51.5984	83.6977	83.9261	83.4005
Nfkbib	7.35547	6.61659	8.46353	13.5854	13.7992	13.4848
Nfkbia	105.908	95.2864	106.925	143.432	140.71	143.093
Il6ra	29.2174	28.8194	29.2012	36.5277	37.057	36.1791
Ifngr2	16.2528	15.1435	16.174	21.3747	21.4399	21.2917
Lck	274.864	283.411	279.338	336.13	339.801	336.499
Zap70	81.3505	75.1335	66.2399	104.366	102.826	104.511
Stat3	54.427	56.4523	49.5164	69.7495	70.5918	69.7909
Hsp90ab1	399.822	466.277	355.811	599.16	599.634	597.427
Il4ra	75.9358	78.6121	81.3995	94.8592	95.6042	94.4726
Tbx21	0.951563	0.654074	0.768427	1.63661	1.69542	1.58759
E2f4	16.0417	13.2296	13.3461	29.8432	29.8197	29.7731
Smad7	16.2834	15.4516	13.121	25.9242	24.8683	25.7653
Smurf1	8.31677	7.80245	6.87412	11.4652	11.6788	11.5101
Rps6kb2	7.15795	5.41099	4.77951	11.1104	11.0483	11.1221
Id3	51.4631	54.4307	46.129	70.4249	70.7345	69.9983
Ppp2r1a	53.9942	54.8715	49.2594	68.2137	70.9329	67.8873
Map3k14	8.93767	8.36687	7.55862	14.9455	15.3489	14.8644
Nck2	10.2981	10.0454	9.813	15.0284	14.848	14.9628
Pik3r2	4.38681	4.00699	3.93448	6.81086	6.66925	6.63717
Grb2	17.7847	14.6221	16.8099	24.7995	25.1867	24.3813
Cblb	17.0726	19.4226	16.1572	26.1991	25.7349	26.2305
Map2k7	14.8935	13.3471	13.4899	18.8571	17.8181	18.7483
Map2k2	22.1574	20.7039	17.5076	28.3563	28.9114	28.4616
Lcp2	90.0583	84.0873	82.627	104.098	103.753	103.988
Mapk14	21.6566	22.4708	17.323	29.196	29.9861	29.0419
Kras	15.4889	13.8548	15.1735	18.0541	18.0229	18.0621
Ikbkb	42.398	41.4668	29.3955	55.6101	55.7879	55.4416
Plcg1	52.5167	50.0868	38.607	65.2802	66.4688	65.2682
Card11	24.7714	22.9193	18.6526	29.9138	30.7896	30.1141
Vav2	9.35721	7.63332	8.19569	10.8365	11.1921	10.9236
Pik3r1	45.8163	48.1248	48.1006	54.116	54.6457	54.0591
Pak4	1.39246	1.19676	1.33183	1.89052	1.89335	1.87506
Nfkb1	77.3852	71.627	65.5918	86.2521	86.9184	86.0116
Akt1	34.6272	32.8988	31.5002	38.8536	38.4002	38.7834
Rasgrp1	66.3339	75.0404	66.2912	83.1242	83.4326	82.7982
Ptpn6	86.9516	84.6942	73.1463	100.037	99.2744	99.945
Ifi204	13.0135	15.423	27.9798	0.0841257	0.0387529	0.0551195
Gdpd3	66.5905	141.814	146.755	1.18659	1.29536	1.17668
Hmga1-rs1	13.5967	0	12.426	0	0	0
Xkrx	201.163	0.291591	198.454	2.18043	2.38441	2.22316
A330049N07Rik	6.64984	16.5242	6.90224	0.279116	0.169675	0.228962
Mnda	6.82861	8.33069	13.2055	0.229264	0.282922	0.239109
Gm14288	7.91188	10.5126	5.93638	0.0902748	0	0.623008
Lyz2	5.2369	6.33099	8.14361	0.21814	0.119081	0.218543
Gm20815	1.69572	0	2.2336	0.00870978	0.0175206	0.00874366
Trim34b	5.56318	14.3789	12.718	0.878134	0.664909	0.784976
H2-T9	1.83561	1.85905	1.18519	0.0488657	0.0601887	0.0512595
Gm20752	3.96548	8.69406	3.74822	0.495575	0.368227	0.484139
Lyz1	1.656	1.19949	1.47257	0.0763835	0	0.0892974
Atp6v0c-ps2	1.27039	2.11269	14.3905	0.521333	0.719605	0.297024
Tex35	2.59834	2.64937	3.50017	0.212393	0.195824	0.248756
Gm20831	1.3479	0	1.09863	0	0	0
Tdg	2.68593	2.58492	5.58826	0.343524	0.282642	0.308104
Lhfpl3	1.0444	1.66995	1.97945	0.100511	0.0585286	0.111524
Snora24	2.23753	0	0	0	0	0
Gm3317	0	2.30982	8.37825	0.509399	0	0.50102
Pstpip2	2.34607	9.79904	1.47087	0.455973	0.548919	0.46225
Bglap3	9.14388	20.4949	8.28602	1.70015	1.80772	1.59729
Ipw	1.14069	0.0315849	0.639702	0.0213117	0	0
Gpnmb	0.665726	0.42112	0.671158	0	0.0215414	0
Lyplal1	0.418445	0.382223	1.12092	0.0198386	0.00997688	0.0298737
Mir3066	0.954056	0.558634	0	0	0	0
Mir6340	1.50832	0	0	0	0	0
Arntl2	0.126091	1.46885	2.08246	0.112607	0.131635	0.12752
Gm5458	0.579966	0.308033	0.567807	0	0	0
1700034K08Rik	0.812401	0.825881	1.83537	0.0441141	0.204001	0.098752
Fcgr3	0.692176	0.829321	1.97872	0.184291	0.0581432	0.114092
Mid1	17.7075	1.34467	18.3817	2.06025	2.12063	2.12262
Xkr6	0.66118	0.768451	0.832386	0.0428569	0.0677373	0.0430236
Gm20736	0.480145	0	0.906898	0	0	0
Gpr15	12.2361	18.8347	20.319	3.01942	2.95156	3.01899
Kynu	0.723105	0.849262	0.803451	0.055722	0.0788423	0.0478503
Speer8-ps1	0.91831	0	0.93652	0.0418629	0.0140353	0.0420257
Oaz1-ps	0	0.928535	3.88976	0	0	0.662063
S100a9	0.936536	0	0.309469	0	0	0
C1qc	0.322805	0.436186	0.597612	0.0147157	0	0.0147729
Mtmr9	57.65	55.2715	46.4535	10.6466	10.5778	10.451
Eif2s3y	66.9809	68.4957	79.9317	14.8892	13.8311	14.3825
Gm6756	0.0739297	0.0258269	1.308	0	0.0267875	0.0183195
Itga7	0.758962	0.643501	0.889319	0.0852889	0.0779853	0.0817288
Naip7	1.86579	2.23572	2.11033	0.372537	0.472916	0.287083
Ddr1	0.866122	0.680317	0.810515	0.0918078	0.117524	0.079597
AI607873	0.600166	0.778059	1.22031	0.136471	0.0950943	0.126491
C1qb	0.372818	0.349277	0.624182	0.0294591	0.014815	0.0295736
Gcnt1	6.57708	10.4416	11.9267	2.24354	1.95846	2.16232
Mir678	0	0	1.01274	0	0	0
Mir24-2	0.493375	0	0.516263	0	0	0
Uty	22.5751	26.216	27.523	5.56347	6.02211	5.70445
Gm17026	0.573658	0	0.577438	0	0.0228188	0.0113877
4933402N22Rik	0.485983	0.304856	0.192194	0	0	0
Mir6346	0.977613	0	0	0	0	0
Sema3d	0.922893	1.09499	0.923352	0.167918	0.149952	0.14449
Gm10012	7.48512	13.8688	30.1445	3.62096	3.32561	4.97281
C1qa	0.390322	0.128558	0.510537	0	0.0145412	0
Mir7682	0	0	0.952416	0	0	0
Pid1	0.494854	0.599967	0.49741	0.0470397	0.0416493	0.0650637
Cpe	2.322	2.89929	3.74309	0.587626	0.635925	0.716855
Ddx3y	54.1866	56.7969	54.5445	13.1706	13.4139	13.2979
Esm1	0.232471	0.152948	0.651236	0.0101248	0.00691025	0.00914773
Tcte3	0	0.161824	1.65071	0.147522	0	0.0691892
Mir3062	0.251386	0.66238	0	0	0	0
Mir466e	0.628465	0.275992	0	0	0	0
Snord116	0.489784	0	0.408163	0	0	0
Snord116l1	0.489784	0	0.408163	0	0	0
Snord116l2	0.489784	0	0.408163	0	0	0
Ppic	2.50409	3.55141	3.823	0.766325	0.758538	0.757095
Anxa1	0.832547	1.11346	1.70274	0.246696	0.191735	0.27017
Dux	0.638707	0	0.381907	0.0154496	0.0233089	0
Kdm5d	24.997	30.325	29.7759	7.22712	7.28727	7.15288
Mir6996	0.865427	0	0	0	0	0
Mir7231	0.865427	0	0	0	0	0
Mir669n	0	0.85864	0	0	0	0
Mir3471-1	0.604478	0.329167	1.26504	0	0.241408	0.119875
Mir7026	0	0	0.82448	0	0	0
Mir3069	351.719	534.186	283.373	101.781	121.044	94.0598
Maged1	2.27316	3.05797	2.5392	0.608203	0.69749	0.610569
Mir5710	0	0	0.800582	0	0	0
Olfr98	0.931791	0.773773	0.825335	0.203356	0.0737615	0.195873
Gm9376	0.376412	0.0745443	0.344585	0	0	0
Gm6455	0.297688	0.222966	0.272851	0	0	0
Speer7-ps1	0.646849	0	0.62177	0.0433317	0.0581109	0.0290002
Mir200b	0	0	0.789145	0	0	0
Gm5795	0.680956	0.569196	0.694342	0.071206	0.188932	0.0651756
Slitrk2	0.605711	0.390378	0.482942	0.0669541	0.0715566	0.0573265
Mir1902	0	0	1.04266	0	0.0747343	0
Lgals3	1.61076	1.44802	2.28036	0.415523	0.406639	0.462236
Rbm14-rbm4	0.942645	0	0.81539	0.0346639	0.210131	0.0354063
Gzma	0.511075	0.264047	1.5729	0.160347	0.161278	0.1252
1700001F09Rik	0.135714	0	0.625596	0	0	0
Spp1	0.80995	1.0024	1.69505	0.327273	0.186531	0.262837
Mir378d	0	0	0.753275	0	0	0
Actr3b	0.882896	1.37709	0.987569	0.22553	0.28128	0.208295
Myo6	7.58519	6.96562	9.422	2.23846	2.14164	2.27311
Slc15a2	8.61857	5.35137	22.4477	3.45113	3.4081	3.41752
S100a8	0.740691	0	0	0	0	0
1700110I07Rik	0.377391	0.88071	0.532619	0.086186	0.108358	0.108152
Cd36	0.28733	0.197798	0.284408	0.00460216	0	0.00462007
Cplx2	2.74684	0.363039	3.38979	0.535339	0.558049	0.573175
Sirpa	0.269975	0.23712	0.267229	0.00432419	0.00434929	0.00434101
1700091H14Rik	0.424078	0	0.381069	0.01127	0	0.0113138
Mir7b	0.475595	0	0.24883	0	0	0
Mir1843a	0	0.724032	0	0	0	0
Mir6937	0	0.713332	0	0	0	0
Ccl2	0.163744	0.17258	0.376949	0	0	0
Tff3	0.230529	0	0.482447	0	0	0
Cxcl1	0.21905	0.192392	0.286515	0	0	0
Mir18b	0.318019	0	0.998316	0.188467	0	0
5830416I19Rik	3.85064	2.47515	3.41187	0.888306	0.933663	0.922393
Vmn1r-ps79	0.284676	0	0.418698	0.00682196	0	0
Slamf9	0.16039	0.100622	0.551442	0.0271576	0	0.0136316
Ssty1	0.417193	0	0.572176	0.0608668	0.012244	0.0244414
Mir296	0.668241	0	0	0	0	0
Trem2	0.283189	0.186544	0.197551	0	0	0
Clec4d	0.375808	0.138978	0.227252	0	0.0235797	0
Trim30e-ps1	0.10628	0.484273	0.447036	0.024747	0.0748384	0.0165345
Mir7087	0	0.66238	0	0	0	0
Ntn4	7.21471	7.10595	6.51861	1.99184	2.2767	2.03867
Gm15915	2.09304	2.55323	1.795	0.516831	0.693107	0.605315
Rassf8	0.624476	0.668877	0.621571	0.0992904	0.172497	0.126861
Msr1	0.185957	0.23646	0.281065	0.00612241	0	0.0120466
Mir219b	0	0	0.637386	0	0	0
Cd40	0.694619	0.551983	0.709538	0.147116	0.118297	0.15743
Mir505	1.17314	0	0	0	0.174817	0
Mir466l	0.218145	1.14958	0.45653	0.129279	0.130029	0.129782
2020-09-10	0.532265	0.890458	1.14044	0.21029	0.219065	0.211108
Nkx2-1	1.17938	0.198675	1.12301	0.180581	0.23855	0.205992
Bpifa2	0.271001	0.166615	0.170144	0	0	0
H2-T3	1.18404	1.22495	1.3564	0.368014	0.282741	0.393383
Enpp2	0.305063	0.381811	0.42296	0.0542367	0.0590974	0.0544476
Clec2f	0.321407	0.141146	0.356497	0.0476187	0.0239475	0
Mir669d	0.43629	0.191597	1.14133	0.129279	0.260058	0
Mir3109	0.599899	0	0	0	0	0
Slc7a10	2.63164	2.82336	3.68104	0.939361	0.988645	0.928724
Mir343	1.7597	0	2.57787	0.41714	0.419561	0.418763
4933406F09Rik	0.367455	0.0537895	0.534031	0.0241961	0.0851777	0.0121451
Gm14718	1.66933	2.60587	3.03321	0.719486	0.813306	0.722285
Mir5103	0	1.17384	0	0	0.199159	0
Adgre1	0.170819	0.164319	0.348975	0.0144617	0.0096971	0.00967865
Dnah7a	3.77732	5.18974	5.46494	1.59573	1.53117	1.57659
Cdc42bpb	0.479347	0.641871	0.489251	0.109439	0.119442	0.121552
Gabrr2	6.49733	7.02422	7.04335	2.37028	2.05779	2.3967
Tshz3	0.240684	0.6352	0.231971	0.0473786	0.0849271	0.0501059
Mir7042	1.36529	0	0	0	0.271268	0
Gm6213	0.248234	0.579582	0.606083	0.0735553	0.172625	0.0492276
Acyp2	0.82609	0.276403	1.02906	0.163188	0.234479	0.14042
Cxcl2	0.511825	0.469874	0.622536	0.115551	0.116222	0.130501
Lrrc6	0.126658	0.289235	0.384348	0.0225184	0.0377484	0.022606
Plod2	1.94592	2.10468	2.75848	0.660763	0.882858	0.641952
Rps15a-ps6	762.108	1046.67	1174.58	346.448	352.748	347.004
Mir466b-3	0.325871	0	0.228462	0	0	0
Adh1	1.78189	2.28737	2.3768	0.696265	0.630275	0.745572
Mir7658	0	0	0.552402	0	0	0
Bicd1	1.42758	1.29085	1.45144	0.412476	0.432652	0.432336
Gm14085	44.5952	37.1405	26.0114	12.8504	12.6446	12.7231
Mical2	0.595863	1.22918	0.834094	0.264259	0.228159	0.265287
Mir28a	0	0.539146	0	0	0	0
Mir335	0.538684	0	0	0	0	0
Mir701	0.726483	0.212691	0	0	0.144344	0
Cttn	1.15353	1.38101	1.45556	0.432287	0.374127	0.433969
1700010I02Rik	0.940795	1.11875	2.463	0.427664	0.406329	0.59789
Galnt14	0.609869	0.949134	0.626966	0.209246	0.178573	0.21006
Mir6416	0.902412	0	0	0	0.134475	0
Hal	0.982607	1.05914	0.86125	0.272245	0.319406	0.26761
Nol3	0.28898	0.0935735	0.715484	0.127367	0	0.0793117
Mir6989	1.62434	0.713332	0.849848	0	0.968218	0
Mtmr7	3.89269	5.59319	3.70138	1.48629	1.75822	1.42672
Scgb2b23-ps	0.665004	0	0.588265	0.0909463	0.0914741	0.0913
5430440P10Rik	1.50657	0.154251	1.39297	0.314549	0.34239	0.286869
Rab17	0.331186	0.203617	0	0	0.00987048	0
Pls3	0.311328	0.421246	0.607518	0.109704	0.095294	0.105125
Cxcl5	0.660685	0.117456	0.60494	0.088699	0.150305	0.0874319
Tmem88	1.34109	1.50435	1.32768	0.417765	0.522929	0.439305
Mir16-1	0	0.498565	0	0	0	0
Mstn	0.28541	0.267965	0.411933	0.058325	0.0703961	0.0468415
Mir6369	0.498029	0	0	0	0	0
Abca5	0.885464	0.978903	0.980465	0.264871	0.328142	0.290194
Mir682	1.36377	1.02876	0.74229	0.347074	0.414644	0.232283
Gbp2b	21.3637	26.5091	20.3059	8.34602	8.58923	8.59316
Tmeff1	0.605303	0.522146	0.339313	0.0960857	0.148186	0.122182
Rpl14-ps1	74.5526	9.50448	59.817	15.4124	22.099	16.6164
Gm8267	0.206481	0	0.321417	0.0126151	0	0
Atp6v0d2	1.29871	0.748163	0.879389	0.297635	0.324043	0.298793
4930444P10Rik	0.46946	0.141952	0.589099	0.119094	0.0220104	0.133136
Cd80	0.636224	1.07671	1.47778	0.339432	0.314486	0.385897
Gstp2	34.177	35.6789	32.5864	14.0297	12.7548	12.3558
Gm20747	0.306734	0	0.173394	0	0	0
Mir133c	0.989833	0	0	0	0.196669	0
Rell1	4.76578	2.46859	4.75654	1.44358	1.59288	1.40072
Mylk4	0.856393	0.0851136	1.05995	0.191063	0.208321	0.18802
Mir6396	0.475595	0	0	0	0	0
Gm10408	6.98064	3.41707	14.7997	3.38065	3.1135	3.07164
Slc9b2	2.77524	3.29662	3.15236	1.19256	1.00307	1.1972
Sly	0.00373793	0	0.46906	0	0	0
Snora15	16.611	11.1919	10.2385	5.2592	3.39085	5.95654
Gm16381	0.274299	0.0336477	0.16075	0	0	0
4932411N23Rik	0.39833	0.0956933	0.383899	0.0645683	0.0442912	0.0518556
Ccl6	0.183813	0.161444	0.173106	0.0108933	0	0.0109357
Asns	1.09582	1.75649	1.96365	0.605173	0.596029	0.51764
Tmem243	47.2098	49.9591	60.0619	20.1258	21.0544	20.9066
Fbxo27	1.40973	2.13437	1.68586	0.604705	0.656231	0.639007
Xlr3b	23.5427	4.08924	23.9273	6.83338	6.67367	6.85708
Cd244	0.119054	0.172733	0.360134	0.0208126	0.0167467	0.0417871
Mir466k	0	0	0.452788	0	0	0
Mir6942	0	0	0.452788	0	0	0
Gcm1	0.74995	0.339087	0.997663	0.207955	0.22966	0.215712
Mir669i	0.831356	0.730182	0.434962	0.123171	0.247772	0.247301
1700047A11Rik	0.951942	0.560886	1.43313	0.269459	0.408564	0.319898
Scarna8	1.04911	0.785874	0.936274	0.265131	0.400005	0.266163
Snora36b	0.233589	0.205162	0.354417	0.138431	0	0
Bex2	0.501866	0.439763	0.681622	0.147236	0.148788	0.181932
Fsd1l	4.73226	4.61713	4.27857	1.7397	1.83952	1.76777
Lrrc66	0.686148	1.13833	0.921851	0.321289	0.313055	0.30238
1810006J02Rik	2.33132	2.98208	3.60191	1.13125	1.04567	1.26597
Afp	2.60665	2.14495	2.85999	0.952363	0.992812	0.971124
3110070M22Rik	1.96663	0.48476	2.0526	0.587891	0.534586	0.535338
Fcrl1	5.00769	5.08587	10.1296	2.39976	2.91252	2.7544
Lrrc72	0.279953	0.105379	0.167394	0	0.0476774	0
Mir1949	220.214	134.794	166.51	69.4985	72.3743	71.7879
Mir219a-2	0	0	0.427115	0	0	0
C230035I16Rik	0.256683	0.0751484	0.402886	0.0507059	0.0510001	0.0254515
Il1r2	17.7198	20.4555	27.3215	8.78674	9.2202	8.9133
Mir6993	0	0	0.424924	0	0	0
Pf4	0.214598	0.0753928	0.134732	0	0	0
Pvrl2	0.367123	0.443362	0.420168	0.101985	0.123092	0.109207
Tgfbi	0.177416	0.0952264	0.206274	0.00584121	0.0117502	0.00586393
Mir7002	0	0.421514	0	0	0	0
Olfr175-ps1	0.474812	0.366562	0.348136	0.121615	0.0764506	0.122088
Gm20871	0.235314	0	0.183907	0	0	0
Gm5591	0.176431	0.00673737	0.235425	0	0	0
Mir297c	0	0.236564	0.563675	0.15962	0	0
Mir6972	0.41243	0	0	0	0	0
Rapgef5	0.814309	0.83732	1.05714	0.309952	0.351213	0.311157
Gm20753	0.732545	0.254451	1.42816	0.2777	0.282601	0.288903
Scarna10	1917.95	2144.57	2071.12	862.945	877.985	865.671
Ssty2	0.23248	0	0.170354	0	0	0
Fbxo17	8.91022	14.3916	8.25178	4.53695	4.05567	4.71559
Stfa3	0.128134	0.22508	0.67039	0.113904	0.0381882	0.114347
Tex26	0.410168	0.275487	0.378703	0.128688	0.0575267	0.10048
Gm5622	0.246894	0	0.240324	0	0.0293354	0.00966226
Tlr3	0.135607	0.25305	0.30001	0.0463824	0.0436336	0.0362921
Sec16b	1.06453	1.01467	1.2848	0.397879	0.42182	0.460601
Wfdc17	0.326543	0.0478006	0.170846	0.0322531	0	0.0323786
Csf1r	0.311093	0.203415	0.441921	0.0726631	0.101507	0.0688932
Mir7227	0	0.392937	0	0	0	0
Mup2	0.135823	0	0.345451	0.0192567	0	0.0193316
Gpc6	0.513981	0.047052	0.637038	0.110343	0.128613	0.11068
Arhgap24	0.834455	0.98873	1.46626	0.4572	0.403544	0.402777
Gna14	1.38103	1.38798	1.49408	0.559496	0.553441	0.575598
Snord90	0.38817	0	0	0	0	0
Nlrc4	0.961188	0.855752	0.801831	0.312977	0.349352	0.312886
Plekha8	3.0595	3.42708	2.95884	1.30794	1.33341	1.31975
Sapcd1	1.36454	0.515072	0.628802	0.229365	0.473038	0.228254
Nr3c2	2.7642	3.03476	2.68294	1.17502	1.20109	1.17575
Shh	0.197458	0.156256	0.163168	0	0.0583301	0
Psg28	5.19588	0.813582	5.87767	1.64964	1.674	1.73263
1600014C10Rik	84.0377	136.363	80.8736	44.1073	44.5905	43.926
Plagl1	2.20009	2.16511	1.85744	0.878383	0.867297	0.831199
Hrh4	0.257601	0.256419	0.395343	0.111952	0.0409461	0.0817364
D330045A20Rik	0.141228	0.266688	0.169947	0.0251088	0.0336726	0.0294075
Mir129-1	0	0	0.378357	0	0	0
Raet1d	0.136592	0.32244	0.517635	0.0694018	0.138387	0.05686
2410012E07Rik	1.23652	1.3025	1.02746	0.498101	0.404295	0.50976
3830403N18Rik	1.67379	1.84034	2.45927	0.79318	0.879536	0.805964
Mir135a-1	0.876918	0	1.27973	0.401497	0	0.387356
Gm7367	0.176535	0	0.199905	0	0	0
Gucy1b3	3.11777	2.73835	3.62774	1.42902	1.27765	1.33314
Cd300lg	0.443736	0.0987572	0.728779	0.134811	0.11701	0.146649
Mir7025	0	0	0.373244	0	0	0
Spaca1	4.91995	3.09312	5.01949	1.82232	1.96486	1.85867
Agr3	0.290061	0.452909	0.775655	0.210098	0.0960534	0.210915
Olfr177	0.156103	0.165025	0.119687	0.0168202	0	0.0168856
Vcam1	0.512686	0.641327	0.503957	0.184141	0.212991	0.184857
Ryr2	1.4707	1.31778	0.966234	0.516631	0.500941	0.508992
Gpr84	0.20366	0.061448	0.208822	0.0194199	0.00976632	0.0194955
Mir194-1	1.57585	0.346019	0	0.466948	0	0.234382
Tmem136	1.52725	1.46982	1.77786	0.634604	0.677082	0.676781
Gm13271	0.279341	0.200162	0.0638934	0.041885	0.038689	0
Tgm2	5.12441	3.67118	4.2101	1.87766	1.89742	1.93364
Lalba	0.0360103	0.0632559	0.263766	0	0	0
Trpm6	0.522243	0.561804	0.629924	0.17754	0.241312	0.192682
Spin2d	0.302443	0	0.093881	0	0.015501	0
Tlr4	0.912557	1.16308	1.40721	0.447284	0.478509	0.489845
Mir6405	0.638602	0	0	0	0	0.126642
4930558K02Rik	0.185418	0.302441	0.388039	0.0941862	0.0315776	0.110311
Snora23	66.9729	64.6524	64.0576	30.954	29.3294	28.7709
Kcnf1	0.257437	0.697567	1.51311	0.314446	0.355874	0.292825
Mir7232	0.356696	0	0	0	0	0
Gm17644	51.6433	15.1344	49.3264	17.5567	18.0745	17.3144
Mir875	0	0	0.354104	0	0	0
Syt17	0.113844	0.142842	0.391412	0.0481909	0.0387764	0.0483783
Vmn1r3	0.143298	0	0.209925	0	0	0
Gm22109	4.35199	1.48871	2.54516	1.21522	1.28339	1.19529
Gm22291	4.35199	1.48871	2.54516	1.21522	1.28339	1.19529
Gm23284	4.35199	1.48871	2.54516	1.21522	1.28339	1.19529
Gm25018	4.35199	1.48871	2.54516	1.21522	1.28339	1.19529
Gm25212	4.35199	1.48871	2.54516	1.21522	1.28339	1.19529
Gm26391	4.35199	1.48871	2.54516	1.21522	1.28339	1.19529
1700128F08Rik	10.1057	2.22017	8.2263	3.33698	2.72842	3.22377
Mir367	0.351941	0	0	0	0	0
Mir5126	0	0	0.351528	0	0	0
Serpina9	1.714	1.65595	1.67938	0.757205	0.650146	0.760151
1700019D03Rik	1.83534	2.60965	1.98672	0.942879	0.895718	0.967636
Mir370	0	0	0.349621	0	0	0
Olfr433	0.0788711	0.0230909	0.24759	0	0	0
Sh3gl2	0.501675	0.269937	0.696532	0.17864	0.165937	0.173314
Gm5114	0.097803	0.0806508	0.169872	0	0	0
Scg5	6.36763	6.95102	8.93679	3.60803	3.01335	3.54528
Cd5l	0.116622	0.136573	0.108474	0	0.00772388	0
Rpl31-ps12	396.803	411.715	499.346	201.7	204.142	204.483
Mir6945	0	0.340931	0	0	0	0
Snord73a	0	0.340931	0	0	0	0
Mir3068	1.33648	0	0.699242	0.396019	0	0.39756
Tnfaip2	0.139698	0.103324	0.215421	0.0305012	0	0.0262456
Dapl1	9.1869	11.572	15.5681	5.65689	5.64137	5.65223
Cldn12	1.70314	2.08657	1.73094	0.820301	0.803502	0.819248
Snora74a	2948.7	2525.5	2512.82	1270.76	1227.47	1268.01
Tmem217	0.239415	0.0788547	0.469729	0.0886778	0.0535154	0.0712182
Prdm5	2.09277	2.24183	2.0191	0.996634	0.886904	0.95733
Mir6392	0	0.64398	0	0	0.145681	0
Ecm2	1.47439	0.658799	2.54659	0.674718	0.680499	0.696268
Snord57	2.93284	4.36435	1.94656	1.72567	0.499477	1.98414
Jag1	0.264292	0.24479	0.266496	0.0768896	0.0658786	0.0657533
Olfr9	0.0747733	0.271583	0.411801	0.0832948	0.0502669	0.066895
4930506M07Rik	0.530369	0.551036	0.568509	0.233817	0.177344	0.211639
4930480M12Rik	0.191008	0.0421514	0.100437	0	0	0
Iqck	0.18344	0.352327	0.176272	0.0360571	0.0823176	0.0614657
Snord70	0.996058	1.31226	0.521134	0.295146	0.593718	0.296294
Vmn2r55	5.97939	2.32119	6.41396	2.39229	2.00626	2.43473
Krt17	0.396278	0.469114	0.284855	0.112317	0.174589	0.102504
Gm15413	0.218258	0.22764	0.242657	0.0404206	0.0650482	0.0649245
Spin4	0.322359	0.405263	0.42991	0.138597	0.135634	0.120334
Omd	0.748753	0.611292	0.484574	0.217801	0.224996	0.282324
Gm4814	0.736281	0.947013	0.953456	0.301817	0.406782	0.395447
Abca1	16.2486	16.1962	15.9015	7.65425	7.74101	7.57238
Ccdc144b	0.398988	0	0.138211	0.0506236	0	0.0504445
Dpcr1	0.198877	0.0609806	0.0973269	0.00491835	0.00524853	0.00505791
Gm4981	0.247504	0	0.167579	0.0258843	0	0.0173233
Adtrp	1.27012	0.627665	1.57087	0.494928	0.498625	0.51655
Rbm11	0.70199	0.779505	0.949869	0.331112	0.331226	0.349622
Gm10354	0.0673999	0	0.257093	0	0	0
Rbmy	0.183766	0	0.139848	0	0	0
Myo3b	8.28903	10.2352	7.93309	4.18311	4.1551	4.23563
Gm3264	9.19012	12.5686	11.7659	5.08736	5.78079	5.13438
Mir455	0.321897	0	0	0	0	0
Mir466b-1	0.321897	0	0	0	0	0
Itln1	0.0689179	0.0605308	0.192307	0	0	0
Gm8580	1.41093	1.75108	1.09847	0.456994	0.682903	0.761278
Prg4	13.3207	15.5009	14.4088	7.13767	6.70494	6.87064
Gm16223	0.648873	0.0824684	0.433183	0.133361	0.155835	0.119462
Gm20809	0.319594	0	0	0	0	0
Mir130c	1.26827	0.426912	1.12164	0.379623	0.259028	0.570692
Vmn1r132	0.174652	0	0.143905	0	0	0
Mir669a-2	0.780981	0	0	0.112886	0	0.111706
Mir1943	0	0.317579	0	0	0	0
Mir3098	0	0	0.317472	0	0	0
Mgmt	6.22159	8.52128	9.15813	3.99739	3.39639	4.06791
Ifitm2	7.68249	7.37882	9.49002	3.89059	4.15551	3.73678
Plekhd1	0.534946	0.518748	0.256545	0.147069	0.183432	0.152984
Anxa3	0.195643	0.171834	0.0682398	0.019324	0.0194361	0.0193991
Snord7	0.316197	0	0	0	0	0
E030024N20Rik	2.93044	3.23032	2.81967	1.39833	1.46343	1.35721
Gm4710	0.641291	0.286938	0.761076	0.208614	0.241746	0.218491
Mir5136	0	0.314195	0	0	0	0
Gm21119	0.214713	0.267429	0.13041	0.0398847	0.0634599	0.0428507
Alpl	0.90983	0.633775	0.952039	0.365659	0.342847	0.360859
Gm13242	0.0984475	0	0.236251	0	0.0114376	0
1700019M22Rik	0.219232	0	0.091761	0	0	0
H2-Bl	0.513851	0.258721	0.39081	0.122562	0.154767	0.141252
Cpq	5.2008	6.03795	6.02659	2.66921	2.96143	2.69589
Tmsb15b1	9.58477	7.52322	8.7365	4.62726	3.55528	4.36303
Glipr1l2	0.176158	0	0.203145	0.0166501	0.00895949	0.00835743
Olfr1444	0.384935	0.193194	0.230167	0.0814727	0.114724	0.0490738
Gm20823	0.309603	0	0	0	0	0
Sh3bgrl2	11.8369	13.0971	14.1532	6.57255	6.01528	6.5712
Gm20867	0	0	0.307185	0	0	0
Mir466b-4	0	0	0.30689	0	0	0
Mir466b-6	0	0	0.30689	0	0	0
Alox15	0.142147	0.134452	0.240274	0.0648002	0	0.0390313
Slc22a2	1.95065	2.0917	3.44889	1.17811	1.16846	1.21207
Tyrobp	0.945915	0.672553	0.848398	0.320329	0.429585	0.321576
Casp4	20.0096	21.6486	30.9617	11.853	12.1229	11.9118
Mir664	0	0	0.304221	0	0	0
B020014A21Rik	3.41439	1.33477	3.89546	1.28072	1.50857	1.35312
Gm4371	0.524632	0.806375	0.874922	0.310912	0.351806	0.28286
Rprl3	15.1187	27.143	27.0317	10.6745	12.2774	11.3488
Gm4884	0.103935	0.0983583	0.122702	0.00548484	0	0.00550617
Bzrap1	5.72077	4.77115	5.70675	2.65242	2.6168	2.65457
Arhgef16	0.582897	0	0.0203313	0.0403015	0.0636985	0.0462381
Bank1	2.6168	2.8194	1.89225	1.14624	1.24977	1.10718
Gm10324	1.71942	1.86964	1.94851	0.889926	0.875998	0.846686
Gprc5b	2.44367	2.92653	2.93041	1.31824	1.39915	1.27735
Dock1	0.108448	0.119063	0.113479	0.00229534	0.013852	0.00460854
Ms4a6d	4.83089	4.32986	6.77549	2.71163	2.42382	2.6992
Pkp2	0.164344	0.232555	0.171969	0.0541085	0.0272112	0.0543189
Klf8	0.550771	0.676201	0.551534	0.245714	0.264756	0.232542
Cyp39a1	0.323317	0.3587	0.391735	0.115973	0.152147	0.121486
Mirlet7e	0	0	0.29699	0	0	0
Cd14	0.125618	0.0689568	0.2136	0.00930563	0.0187193	0.0280255
Mirlet7f-1	0.296579	0	0	0	0	0
Mir1901	0	0	0.676338	0.0962631	0.0948047	0
Arhgap5	29.007	34.4785	40.2528	17.5389	17.145	17.357
Bcl2l15	1.68346	1.32411	2.30578	0.838964	0.813834	0.873823
2900009J06Rik	0	0.0990739	0.472138	0.0718631	0	0.0671094
Gm17757	46.0062	69.4762	49.7401	27.4924	27.9282	27.747
Rnf32	0.792572	1.17518	0.84819	0.415365	0.439465	0.416874
Rhod	1.4993	1.31684	2.31199	0.748234	0.952479	0.739407
5031410I06Rik	0.1202	0	0.248084	0.0162426	0	0.0211548
Gzmb	4.41167	4.07097	7.98606	2.63654	2.80718	2.72432
Hdac9	2.45838	2.17968	2.76442	1.24893	1.15051	1.19025
Snord89	11.2321	8.87871	10.8717	5.32519	5.18872	5.01179
Mgarp	0.301951	0.495048	0.652982	0.167015	0.239978	0.179641
Ifi202b	0.0735457	0.0645954	0.153915	0	0	0
Zfp457	0.805581	0.211574	0.973552	0.272215	0.346257	0.24338
Ccl19	0.146642	0.128796	0.230167	0.0434521	0.0218521	0.0436211
Osbpl6	0.222017	0.151297	0.204516	0.0573646	0.046936	0.0414269
Gpm6b	10.2542	13.3727	15.4007	6.55883	6.50037	6.63602
Fcgr2b	0.0656624	0.0589822	0.2356	0.0117182	0	0.0240826
5430435G22Rik	0.114148	0.073047	0.163066	0.012322	0.00619675	0.0123699
Ankrd6	2.54808	2.62925	2.44876	1.19697	1.28871	1.2476
Bambi-ps1	19.312	13.9096	18.9024	8.44889	9.41733	8.52208
Cldn10	1.04482	0.917672	1.72625	0.554014	0.639175	0.539811
Mpeg1	0.309607	0.437219	0.32035	0.14031	0.10132	0.155302
2510003B16Rik	0.812578	0.714113	0.732335	0.263472	0.47459	0.266789
Cfap46	0.18562	0.0583322	0.339207	0.0496036	0.0470378	0.0537344
Gm20865	0	0	0.288001	0	0	0
Catsperg2	0.11947	0.127781	0.0404843	0	0	0
4930512J16Rik	0.0993915	0.162121	0.208005	0.0336584	0.0338538	0.025342
Mir467d	0	0	0.649884	0	0.1851	0
Fam229b	0.541632	0.28543	0.340056	0.149794	0.150663	0.150377
Selp	0.751021	0.922746	0.97554	0.42442	0.381348	0.404192
Zfp14	3.88192	5.43897	4.45653	2.27297	2.42871	2.21784
Gsta4	23.375	27.796	30.4672	14.2236	13.3816	14.1171
Slpi	0.0295252	0.207457	0.525214	0.104985	0.0351981	0.105393
Krtap19-5	0.0547625	0	0.229212	0	0	0
Mir1936	0.283823	0	0	0	0	0
1500009C09Rik	0.106326	0	0.176705	0	0	0
Rab39b	1.19486	1.59462	1.64811	0.68052	0.687753	0.770871
Magi1	0.394404	0.310571	0.30241	0.141047	0.107412	0.125413
Il15	0.16281	0.375366	0.212954	0.0603036	0.133438	0.0484305
Snord72	2.63955	0.772776	0.920669	0.782138	0.524451	0.78518
Mir1969	0.280804	0	0	0	0	0
Mir692-2	0.339025	0	0.309142	0.0947176	0	0.0950861
Mir692-3	0.339025	0	0.309142	0.0947176	0	0.0950861
Gm3704	1.73034	0.415894	1.88809	0.630721	0.654338	0.657512
Mir1898	0	0.279317	0	0	0	0
Slc7a13	0.114537	0.0217275	0.263128	0.0155401	0.0331776	0.0136873
Mir690	0.4819	0.631691	0	0	0.433033	0
Ermn	0.228563	0.207539	0.508987	0.128227	0.113149	0.104882
Gm5544	0.681366	0.598446	1.27096	0.421354	0.406141	0.352494
Art3	1.78981	2.10986	1.69781	0.902085	1.017	0.845885
Cyp4v3	12.4851	14.1553	14.489	7.02568	7.24387	6.98333
Rnf128	1.20327	1.30846	1.41898	0.63386	0.574923	0.69314
Mir135a-2	0	0	0.276201	0	0	0
Casp1	29.2365	29.6406	41.313	17.318	17.4903	17.2317
Coprs	0.164561	0.173441	0.275512	0.0780187	0.0196179	0.0783222
Mir1955	0.538684	0.709693	0.563675	0.15962	0.321093	0.320482
Glo1	69.9665	44.3315	78.5907	33.0954	34.0297	33.3088
A630073D07Rik	0.218145	0	0.0570663	0	0	0
A430089I19Rik	0.0851927	0.0124708	0.209639	0.0168292	0	0
Ndp	0.20946	0.0491695	0.261344	0.0402288	0.0639175	0.0242955
Gm4951	6.76047	7.9303	5.70968	3.48589	3.60119	3.43386
Daw1	0.834367	1.25191	0.509293	0.401757	0.481072	0.330929
Ctsf	1.29652	1.1621	1.73412	0.704914	0.661207	0.683803
Clec2e	0.523029	0.31299	0.571131	0.234263	0.124635	0.235105
Mir466j	0.27261	0	0	0	0	0
Gm20806	0.0306495	0	0.241088	0	0	0
Klhl7	10.272	13.312	14.0884	6.42453	6.558	6.64587
Folr2	0.269592	0.301361	0.393144	0.130719	0.116869	0.116647
Mir6398	0	0	0.270785	0	0	0
Gm20877	0.103666	0	0.166814	0	0	0
Mir7030	1.7597	0	0	0.521425	0	0.261727
5730403I07Rik	0.808501	0.173732	0.710969	0.239609	0.242781	0.266289
Rgs20	0.646365	0.205514	0.390748	0.173964	0.185488	0.152726
Mir551b	0.269342	0	0	0	0	0
Sh3gl3	10.4223	10.1635	11.942	5.67706	5.71641	5.63292
Derl3	1.63984	1.40557	1.40602	0.655684	0.895022	0.658235
Klhl4	0.313817	0.318502	0.561888	0.173579	0.137175	0.178403
H2-Q1	1.51387	1.09633	1.19642	0.630761	0.564529	0.675701
Kndc1	0.256022	0.354717	0.418829	0.143178	0.137561	0.122282
Ccl7	0.0581744	0.178705	0.0302852	0	0	0
Mir350	0.266622	0	0	0	0	0
LOC330796	1.50071	0.589181	1.64423	0.580371	0.658739	0.599677
Vegfc	0.168393	0.394399	0.411144	0.116427	0.142196	0.11688
Cyp3a41a	0.201682	0	0.0638211	0	0	0
Fam81a	0.551166	0.364355	0.549815	0.22284	0.168796	0.245331
Mir7015	0.824861	0.362239	0	0.244418	0	0.245369
Gm8909	0.414704	0.239008	0.261546	0.122076	0.0934505	0.130651
Gm11237	0.065082	0	0.198275	0	0	0
Serpinc1	2.82679	2.83197	2.86251	1.43386	1.57995	1.3888
Gm8994	0.128034	0	0.154693	0	0.0114026	0
Ly6g6c	0.988733	0.482985	0.775376	0.221443	0.508882	0.331248
Ifi205	0.0463108	0.0363631	0.177912	0	0	0
Olfm1	0.111088	0.0162616	0.193737	0.0109724	0.011036	0.011015
Rnf17	0.348659	0.54959	0.230704	0.148892	0.158925	0.158622
Mir297a-3	0.25878	0	0	0	0	0
Mir6373	0.25878	0	0	0	0	0
Abhd1	3.16613	5.22556	2.92909	2.05965	1.98974	1.89197
H2-L	0.240182	0.220209	0.265686	0.100218	0.0511303	0.100608
Adipoq	0.406744	0.24443	0.291209	0.139554	0.102083	0.127361
Pard3b	0.275726	0.173744	0.183904	0.0662617	0.0696025	0.0667996
Vmn1r148	0.125322	0	0.14314	0	0	0.00656731
4930428D20Rik	0	0	0.255741	0	0	0
Tceal3	0.728741	0.862443	1.90821	0.568072	0.571369	0.612009
Gm10696	0.234353	0	0.0983358	0.0208849	0.00700202	0.0139774
Mir7090	0	0.747848	0.445485	0	0.253767	0.253284
1110019D14Rik	1.4625	1.82634	1.71473	0.793625	1.0189	0.754779
Mir7013	0.733209	0	1.53445	0.434521	0.218521	0.436211
4930542D17Rik	0.134691	0	0.162232	0.0114851	0	0.0115298
Col1a2	0.128308	0.126217	0.118149	0.0182494	0.0214145	0.0244272
Rprl2	2.29242	3.2817	3.69041	1.57085	2.07907	1.23451
Bmpr1a	1.09319	1.62	1.7335	0.764871	0.75777	0.750656
Gas2	1.79099	1.44285	2.2414	0.957231	0.971842	0.903858
Kcnmb4os1	0.128648	0	0.123979	0	0	0
Gm17019	0.147644	0	0.104018	0	0	0
Gm7168	0.148197	0	0.103381	0	0	0
Lrrc3b	0.141742	0.0138325	0.164798	0.00933339	0.0187751	0.00936969
Gucy1a3	5.21627	5.15184	5.25083	2.73693	2.70495	2.91914
Myoz3	0.770265	0.253467	0.844295	0.33657	0.254969	0.288046
Gmcl1l	0.191722	0	0.0596198	0	0	0
Ube2u	0.265173	0.100711	0.164956	0.0627979	0.0175278	0.0719447
Ehd3	34.7633	29.5406	31.7288	17.6141	17.4102	17.1325
Elovl7	0.448622	0.430887	0.552452	0.216784	0.201942	0.224395
Slc35f3	0.0871318	0.0685339	0.189888	0.0114062	0.0336259	0.0067688
9130015A21Rik	0.445704	0.282846	0.299202	0.168819	0.0639142	0.190952
Map2	0.53411	0.783248	1.3074	0.435228	0.417856	0.442595
Gm13102	0.249797	0	0	0	0	0
Gm16386	1.89615	1.92508	2.36822	1.07228	1.09747	1.07176
Zfp945	8.76805	9.89456	17.0348	6.42211	6.36084	6.56812
Gm10471	0.178577	0.00693695	0.10372	0.00748905	0	0.0144725
Gm904	0.1212	0	0.127674	0	0	0
Tmem141	0.214071	0.214879	0.352003	0.0906175	0.127601	0.072776
Zfp960	17.7803	20.9144	25.8148	11.5766	11.742	11.8261
Slc12a2	8.44495	8.96393	9.84067	5.01432	4.74192	5.01456
Hgf	2.34617	2.64162	2.93087	1.44553	1.25062	1.50035
Mir6997	0	0.65305	0	0	0.221599	0
Itgam	0.239062	0.247425	0.367614	0.104635	0.11422	0.113264
Nsg2	131.696	135.762	150.442	76.7791	76.0632	76.002
Speer4d	0	0	0.272149	0	0	0.0135493
1700096J18Rik	0.05814	0.510645	0.182512	0.103366	0.0693107	0.103768
Olfr178	0.184219	0.154555	0.0575418	0.0162945	0.0491673	0.0163579
Acvr1	0.230739	0.243191	0.183497	0.0656365	0.0935246	0.0658918
Usp17la	3.05488	0.983264	2.98455	1.22744	1.19069	1.29789
Tm4sf20	0.263429	0.323918	0.477792	0.1353	0.157021	0.156723
Mir8103	0.246687	0	0	0	0	0
Mir466f-1	0	0.246631	0	0	0	0
Gm3383	32.1644	33.1821	37.6885	19.5164	18.2508	18.6678
Snord15b	1979.3	1674.62	2040.46	1058.75	1021.16	1052.04
F830016B08Rik	9.79845	7.16333	9.31225	4.64699	4.9171	4.75914
Smok4a	0.0971328	0	0.14799	0	0	0
Nxf7	0.0850098	0.0746644	0.207558	0.0167931	0.0337811	0.0168584
Cers6	4.21597	4.85492	4.59632	2.39597	2.62626	2.36929
Aym1	0	0.0878155	0.156932	0	0	0
Gas6	0.0610537	0.0446864	0.13842	0	0	0
Snord58b	0.479919	0.843029	1.50655	0.568828	0.286064	0.57104
Tnfaip6	0.293137	0.0724025	0.258604	0.0850044	0.0299733	0.0951436
Wnt10a	1.482	1.7238	1.49486	0.854536	0.819704	0.786372
Erich3	0.118248	0.0833168	0.0962372	0.00778634	0.0156631	0.00781663
Gm14305	4.94074	4.61578	8.1325	3.26935	3.09866	3.30212
2210404O09Rik	9.12078	10.037	11.715	5.75669	5.66861	5.57877
A430085M09Rik	2.62278	0.938945	2.54845	1.08694	1.03078	1.14128
Mir6541	0.239959	0	0	0	0	0
9230105E05Rik	0.145117	0.0433785	0.243425	0.0289217	0.0358025	0.0421555
Man1c1	0.796961	0.80077	0.70049	0.358373	0.449148	0.337486
Gm7120	6.73741	5.97014	7.63801	3.5978	3.93914	3.65682
Fcrl5	0.280597	0.419589	0.626048	0.185649	0.199257	0.222051
H2-T10	41.9395	37.5794	35.7399	21.2003	21.8647	21.1535
Fabp7	0.103919	0.0608485	0.0724936	0	0	0
Smok3a	0.111247	0	0.191412	0.00666331	0.0168838	0.0131212
Cpne7	0.686873	0.555403	0.433525	0.232606	0.285946	0.285402
Kif5a	0.333166	0.284	0.602313	0.17964	0.183635	0.18596
Lhfpl1	1.17111	0.648041	0.55996	0.421592	0.387526	0.388765
Mir669m-2	0	0.236564	0	0	0	0
Eml6	0.773082	0.879129	0.590311	0.373916	0.375794	0.37195
Gm14347	0	0	0.236462	0	0	0
Ms4a8a	0.141911	0.0207736	0.123746	0.0280336	0	0
Prkag3	0.400449	0.142943	0.474656	0.158414	0.155726	0.124078
Pik3r3	2.87481	3.35426	2.81422	1.61617	1.69786	1.61932
Snord99	0.348798	2.89791	3.44265	0.279335	2.77585	0.560843
Chic1	2.93714	2.83988	2.96226	1.55174	1.60562	1.61242
Slc12a8	1.49884	1.6422	2.04646	0.954994	0.904891	0.918163
Olfr1471	0	0	0.234113	0	0	0
Olfr857	0.0851469	0	0.148495	0	0	0
Acpp	3.47488	3.91502	4.04484	1.9821	2.21967	2.09898
Art4	5.31443	3.81202	3.31348	2.12595	2.46167	2.27913
Gm6402	2.14259	1.73738	1.46065	0.963252	0.875787	1.03521
Hhex	0.0353232	0.0395333	0.195883	0.0105993	0	0.0106405
Mlph	0.893646	0.340821	1.20022	0.433002	0.358777	0.448274
Glt28d2	1.18534	1.09123	1.78032	0.687664	0.776445	0.68965
Ccdc122	1.77913	1.26626	1.74932	0.854398	0.784574	0.930719
Olfr181	0.0815966	0.1915	0.0992814	0.0112457	0.0565548	0.0112894
Rxfp1	0.0695535	0.040726	0.19408	0.0206097	0.00690977	0.0137932
Ccr1	0.59672	0.327563	0.663331	0.2597	0.236587	0.271804
Gm3500	14.7864	20.6161	23.8911	10.0366	12.0487	11.3416
Echdc2	0.62397	0.707142	0.716103	0.369783	0.335935	0.323322
Mir6981	0.229526	0	0	0	0	0
Olfr893	0.112083	0	0.117283	0	0	0
Efhd1	0.175483	0.0385318	0.030604	0	0.00871664	0
Actg2	3.11019	3.85524	4.36813	2.16969	1.97109	2.15471
Lcn6	0.134671	0.059141	0.0352297	0	0	0
Ccr6	14.0416	18.1379	18.3453	9.36479	9.83457	9.35701
Nlrp4e	0.0747691	0	0.153291	0	0	0
Grid1	0.70996	1.00943	0.614777	0.395542	0.429076	0.374197
Stra8	0.11683	0.0318671	0.212988	0.0431117	0.0117866	0.0216936
Xlr	2.13352	4.66138	3.57933	1.84984	1.96566	1.9705
Gm20337	6.59588	2.99515	6.10399	2.88281	3.02767	2.91259
Apol9a	9.85672	10.8429	10.7224	6.07321	5.81981	5.90711
Fcgr4	0	0.0931041	0.132576	0	0	0
Poln	1.6174	1.44344	1.42657	0.799749	0.797862	0.834695
AW822252	0.182644	0.0428923	0.0781845	0.0149048	0.029837	0
Mxra8	0.544119	0.894794	0.726844	0.336182	0.434743	0.33749
Pm20d2	0.217676	0.286778	0.252532	0.084131	0.126929	0.0929041
Prune2	0.616177	0.537151	0.590172	0.300103	0.276532	0.291092
Akr1c20	0.379966	0.071538	0.380675	0.119776	0.0949313	0.132266
Gzmk	0.0666554	0.0878155	0.139495	0	0.0198656	0.0198278
Pira2	0.129616	0.0137868	0.0966384	0.00447065	0	0.00448804
Slc16a5	1.52954	2.74707	2.30472	1.20687	1.25556	1.17517
Pfn2	3.18837	3.23648	4.4575	1.9747	2.01732	2.10677
Serpina1a	0.166026	0.0482273	0.176744	0.01042	0.0663188	0.0186917
1700122C19Rik	0.109525	0	0.114606	0	0	0
1600010M07Rik	0.644034	0.262694	0.794526	0.330123	0.179046	0.337016
Sdc1	0.181324	0.121339	0.216841	0.0511703	0.0720542	0.0462324
Fam221a	0.69455	0.743122	0.594631	0.321804	0.361308	0.353108
Galnt11	15.8559	20.654	17.2594	10.1283	10.2277	10.3439
Mir6910	0	1.05379	0	0	0.238387	0.237933
Il1b	0.0596285	0.0174573	0.187184	0	0	0.02365
Klrc1	0.0132441	0.0581618	0.151612	0	0	0
Mup12	0.222703	0	0	0	0	0
Alox5ap	0.272431	0.29245	0.316744	0.0896947	0.198474	0.0900436
Gm3488	23.3663	26.1929	20.8797	13.0697	14.0697	13.1796
Ntrk3	0.6165	0.682996	0.732263	0.340445	0.398419	0.30009
Cdh17	0.288642	0.273529	0.508686	0.162054	0.167523	0.158166
Olfr172	1.17992	0.911152	1.07538	0.658174	0.356714	0.677317
Gm4567	0.19954	0.101954	0.379473	0.0546613	0.114695	0.0944778
Snx31	0.14662	0.120347	0.0565725	0.014685	0.0290735	0.0146839
Vmn1r195	0.145564	0	0.0761583	0	0	0
Mlf1	0.23297	0.368314	0.438801	0.165678	0.138866	0.166322
Fcrls	0.185604	0.0349321	0.0554899	0.00785673	0.0158047	0.0078873
Zfp433	16.9717	19.0952	24.6575	11.59	11.6788	11.5599
2010204K13Rik	2.01322	1.88105	2.59448	1.34422	0.99087	1.27397
Lrrn3	2.84225	3.46692	3.72286	1.8795	1.83235	1.94436
Cep290	2.86151	3.32382	3.06877	1.75626	1.69697	1.75545
Olfr101	0.215834	0.0875313	0.104283	0.0614236	0.0169725	0.0296454
Krtap5-1	0.0761776	0	0.143481	0	0	0
Ublcp1	17.8003	21.3222	23.3393	11.9039	12.1483	11.9138
Avpr1a	0.138352	0.138874	0.175792	0.0468521	0.0412335	0.0470344
Cd160	6.17047	6.63825	8.64564	4.10533	4.04764	4.1213
Olfr512	0.134534	0	0.0844651	0	0	0
Mir721	0	0.526893	0	0	0.17879	0
Mirlet7g	0.599899	0.526893	0.941593	0	0.35758	0.7138
Ccng1	83.6834	110.396	110.428	59.0702	58.4141	58.7424
BB283400	0.459883	0.793832	0.468222	0.293302	0.32804	0.24967
Sdc4	12.8398	12.0656	10.5788	6.53416	7.23615	6.66835
Gm26705	3.20041	1.84098	3.33071	1.6167	1.42434	1.6851
Fmr1nb	0	0	0.561312	0.0794755	0.0399683	0.0797846
Tfap2a	0.197783	0.132148	0.245806	0.0610237	0.0818533	0.0656785
Lgalsl	4.22779	4.9493	5.61937	2.87474	2.73928	2.85404
Lysmd3	19.9119	23.4098	23.6907	13.027	12.8456	12.943
Jakmip2	0.0463106	0.0927068	0.092906	0	0.0092313	0
Etv1	0.103203	0.107639	0.202483	0.0344031	0.046137	0.0345369
Gm9573	0.136242	0	0.0792011	0	0	0
Gm6034	2.12069	1.53296	2.35574	0.995849	1.40735	0.974335
Dusp14	1.8658	2.10465	2.584	1.14909	1.34111	1.20797
Olfr173	0.0299331	0.242986	0.346437	0.0561742	0.125841	0.054369
Tfrc	27.013	27.091	32.0401	16.8113	16.5141	16.8273
Iglon5	0.304469	0.283672	0.226921	0.118768	0.103031	0.13018
Pifo	0.556281	0.513013	0.698506	0.329668	0.248686	0.330951
Mir692-1	0	0.212691	0	0	0	0
Fhit	1.66625	2.28836	2.49079	1.34797	0.945904	1.35322
St8sia4	147.096	176.191	165.811	95.2145	95.2907	95.5932
Ccr2	17.3635	23.6497	21.7571	12.2541	12.1113	12.2506
0610031O16Rik	0.0320334	0.11254	0.100559	0	0.0190941	0
C3ar1	0.281577	0.218243	0.334987	0.120004	0.119164	0.12511
Arl6	0.907783	1.1653	1.24217	0.55867	0.707593	0.550457
Spa17	0.0377079	0.165595	0.315658	0.0446936	0.112382	0.0224337
5830444B04Rik	2.33673	1.73268	2.30936	1.26071	1.18369	1.16653
G630071F17Rik	0.14375	0.0144379	0.160811	0.0205492	0.0273028	0.0146696
Oat	47.4017	51.3905	58.5085	30.654	30.9073	30.4453
Gm10409	0.229999	0.939331	1.82098	0.583734	0.509482	0.534475
Il23r	0.519954	0.847942	0.799295	0.374345	0.446711	0.325055
Tmem159	0.850872	0.958524	1.12261	0.537137	0.529229	0.528222
Kif5c	3.00203	2.53878	2.77122	1.59024	1.60383	1.55991
Mir707	0.37243	0	0.0870222	0.0299998	0.116385	0
LOC100504703	1.84528	1.62072	2.01484	0.950927	1.43467	0.71597
4930555G01Rik	2.09528	1.60285	2.33386	1.19362	1.07422	1.15834
Kctd12b	1.27752	1.66408	1.49144	0.812178	0.866389	0.8084
Ift43	0.703881	0.533918	1.1048	0.322336	0.572129	0.361659
Abcg2	8.24752	10.3595	11.8435	5.86054	5.96398	5.99672
Gpr34	27.5244	30.8403	35.5666	18.1482	18.8032	18.3016
Clec12a	0.0593959	0.0730347	0.124303	0.0140799	0.0070808	0.00706733
Plekhf1	1.2529	1.54654	1.04528	0.752538	0.595432	0.795757
Il9r	3.18183	2.85471	3.21309	1.77296	1.79462	1.76454
Gm5065	0.0971604	0.0672444	0.0822117	0	0.0223833	0
Olfr530	0.142833	0.0250901	0.0980453	0.0169294	0	0.0169952
Klk1b9	0.0910191	0.266475	0.231755	0.0863049	0.0904226	0.0480133
AF251705	0.0231743	0.0618764	0.122944	0	0	0
Hoxb3	0.629414	0.475842	0.233433	0.231454	0.213706	0.222875
Snord12	2.39959	1.75631	2.09243	0.948046	1.66871	0.951734
Gm3285	0.0413424	0	0.166386	0	0	0
Satb1-AS1	3.44792	4.37942	6.30531	2.74688	2.60101	2.88299
Mir680-1	1.06066	0.850763	0.760186	0.740519	0.142901	0.573398
Pik3c2a	31.8467	41.9797	42.2731	22.9627	22.8368	22.7178
Serpini1	8.10485	8.59846	9.9635	5.33736	4.99677	5.31802
Grtp1	1.41045	1.11492	1.79214	0.800049	0.828473	0.803162
AF357399	0.280804	0.739892	0.881492	0.166412	0.669512	0.16706
Prelid2	4.04683	4.547	6.18018	2.76471	3.27927	2.58003
Pros1	9.95572	11.4073	10.6478	6.42932	5.99121	6.41111
Tenm4	0.106744	0.14172	0.181831	0.0432224	0.0488298	0.0404073
Eif5a2	7.34443	8.21841	10.0524	5.09204	4.9514	5.00804
Hist1h4m	0.583961	3.13518	0	0.705276	0.66819	0.708019
Trim58	0.147632	0.024114	0.228445	0.021623	0.0715618	0.0217071
Mir486	0.206215	0	0	0	0	0
E130006D01Rik	0.135016	0	0.0706396	0	0	0
Impg1	0.208913	0.168559	0.209826	0.0825093	0.0625482	0.081692
Bsph1	0	0	0.2051	0	0	0
Asb15	0.137853	0.103586	0.204627	0.0543905	0.0377856	0.0509962
Rfx8	0.0782476	0.057271	0.095524	0	0.00777349	0.0077587
Mir1843b	13.0698	12.382	14.4712	9.00644	6.44598	8.1635
Btc	0.802329	0.945549	0.825913	0.472492	0.442246	0.497208
Gm15319	0.242222	0	0.509994	0.0944539	0.13055	0.10213
C6	0.191582	0.0323902	0.0989808	0.0218551	0.0384683	0.01097
Snora2b	1.17837	1.03497	2.21947	0.977672	0.561912	0.981475
Pla2g10os	0.957735	0.20872	1.41772	0.472591	0.472481	0.474429
Fabp5	20.17	17.2841	24.7618	12.2447	12.6736	12.0812
Tmem205	1.14637	1.37781	1.13642	0.625739	0.827172	0.610225
Cacng6	0.202265	0	0	0	0	0
Zscan4f	0.141575	0	0.0605558	0	0	0
Gm2560	0.336821	0.107178	0.123096	0.0683287	0.0990759	0.0510106
Ddc	1.14063	0.766098	1.02505	0.501014	0.591907	0.54288
Gm21637	0.0468198	0	0.165081	0	0	0.00666091
Spin2-ps1	0.0468198	0	0.165081	0	0	0.00666091
Olfr934	0.141455	0	0.059207	0	0	0
Klhdc2	19.4649	20.874	27.8907	13.558	13.8825	13.3281
Acot12	0.0692569	0.167279	0.117764	0.0410436	0.0206409	0.0309025
Oprl1	0.180359	0.16633	0.0754905	0.037036	0.0430025	0.0533826
Rgs1	364.158	368.138	425.218	232.638	229.096	232.857
Smok2a	0.13796	0	0.0616699	0	0	0
Gm3238	0	0	0.199279	0	0	0
4930519G04Rik	0.183812	0	0.122816	0.0147082	0.0235001	0.0263778
Rnase12	0.145297	0.0425381	0.202716	0.0574046	0.0288689	0.028814
Mir669h	0.211164	0.185466	0.220961	0	0.251737	0
Atg4a	17.304	18.0432	22.3492	11.3753	11.9436	11.2691
Rps27a	1562.33	1593.58	1908.94	1020.81	1009.7	1017.85
Ccnb2	3.23735	3.59559	4.76764	2.37534	2.16451	2.32344
Abcb1b	4.7995	5.61346	5.35908	2.97832	3.30741	3.09047
Olfr1283	0	0	0.203089	0	0	0.00290808
Sntg2	0.203303	0.228162	0.212735	0.100403	0.074056	0.0940738
D630024D03Rik	0.0329019	0	0.165256	0	0	0
Susd4	0.869042	1.20758	1.37082	0.714878	0.533471	0.709942
Pls1	0.0642575	0.119146	0.127006	0.0126936	0.0425576	0.012743
Prss12	4.18157	4.73955	5.31848	2.82014	2.8184	2.83111
F11r	0.0969892	0.056417	0.117513	0.0189705	0.0127415	0.012654
1700101E01Rik	0.567036	0.249015	0.415339	0.168021	0.253494	0.20241
Serp2	0.930863	1.30922	1.10392	0.661987	0.591848	0.646102
Mrc1	0.0793552	0.0479174	0.103796	0.00881779	0.00295632	0.00885209
Snora81	43.2951	55.4137	30.1463	27.661	23.5044	26.5238
Msrb3	0.163209	0.180584	0.215144	0.0714281	0.0717159	0.075924
Dmd	0.203895	0.252763	0.24399	0.114072	0.0693629	0.121418
Madcam1	0.130119	0.195915	0.272311	0.0660962	0.1108	0.0663533
Agbl1	0.297723	0.206441	0.122975	0.102149	0.0840617	0.0745793
Gm4971	0.124345	0.0873699	0.130886	0.0294761	0.0296472	0.0295907
Scgb1b19	0	0	0.195887	0	0	0
Olfr367-ps	0.0957227	0	0.100163	0	0	0
Scin	1.08487	1.05928	1.55804	0.743551	0.62092	0.758294
Tmigd1	0.212556	0.135773	0.283075	0.103064	0.0575898	0.103464
Fam135a	0.0489789	0.1183	0.128128	0.0145131	0.0340605	0.0121413
Noxa1	3.77189	3.03801	2.89215	2.06913	1.70903	1.98195
Ugt1a6b	0.252099	0	0.0596247	0.0181464	0.0340333	0.0185594
Il18	0.731516	0.696034	0.861134	0.343201	0.581378	0.344536
1810041H14Rik	9.1842	10.7342	14.6046	7.67652	5.6033	7.52913
Ryk	2.64615	2.49241	2.80021	1.56756	1.59994	1.53008
Zfp30	0.566125	0.646176	0.35904	0.314117	0.223375	0.297729
Capn3	24.4197	23.9654	24.2985	14.5899	14.7947	14.5926
Snrpn	0.257524	0.240424	0.46183	0.138879	0.147432	0.17824
Clec4e	0.0523929	0.0644236	0.0877176	0	0.00624595	0
Snora21	42.0679	32.4204	35.604	22.3655	21.0362	23.3125
Olfr100	0.00227793	0.0875313	0.104283	0	0	0
Morc1	0.103851	0.098814	0.126781	0.0256439	0.0257927	0.0308923
Pkhd1l1	0.254929	0.286691	0.264286	0.116554	0.130804	0.124397
Gm6696	0	0	0.193825	0	0	0
Klk1b11	0.140575	0.0529904	0	0	0	0
Snora44	19.1762	17.437	19.8298	11.2307	10.3546	12.6166
Adig	0.0793851	0.0697242	0.0830679	0	0.0236595	0
Gpihbp1	0.159779	0	0.0334383	0	0	0
Rasgef1b	1.73736	1.60339	1.5042	0.982677	0.893652	0.955018
Pdpn	0.0435211	0.0127416	0.13662	0	0	0
Zc3h12c	3.47321	4.05592	3.16989	2.05322	2.18448	2.15705
C5ar1	0.0630843	0.00923453	0.12047	0	0	0
4930524B17Rik	0.621213	0.635991	0.495832	0.339289	0.298685	0.311973
Zfp534	0.356104	0.263089	0.168063	0.132405	0.0615996	0.168183
Plcb4	4.33088	4.40187	4.68314	2.71109	2.75324	2.59399
Gbp3	68.5213	82.0557	70.8487	45.0315	44.5995	45.2865
Fam124a	0.131941	0.0404094	0.165705	0.0279696	0.0383939	0.0228248
Gm15104	0.191272	0	0	0	0	0
Rnf165	0.125434	0.0403119	0.161321	0.0357897	0.0116266	0.0357573
Gm4070	207.961	345.88	271.554	172.307	160.977	171
Lce3a	0.190658	0	0	0	0	0
Hrc	0.183137	0.0842684	0.136009	0.0598049	0.0124941	0.057852
Ctnnal1	0.590202	0.680759	0.721753	0.366627	0.393805	0.34267
Bend6	1.66265	1.32099	2.04708	0.999098	0.964375	1.00298
Tex15	0.354745	0.463225	0.479606	0.212093	0.260105	0.207314
Fam24a	0.284588	0.249955	0	0.0421638	0.127225	0.0423278
Nhlh2	0.136111	0.0193597	0.241604	0.0426875	0.0371636	0.0476307
Rprl1	0.226247	0.298071	0.487413	0.146569	0.136842	0.221038
Ccdc91	10.5072	10.4638	11.2955	6.90397	6.1935	6.5758
Olfr1381	0.169202	0	0.0197708	0	0	0
Pgap1	5.41299	6.04181	5.62897	3.46742	3.4354	3.46458
Agbl3	0.767486	0.916757	1.07614	0.536705	0.466624	0.575321
Mrgpra4	0.243584	0	0.0876565	0.0104077	0.0666817	0.0104482
2810403D21Rik	1.1031	0.877274	1.67644	0.669603	0.677873	0.781743
Mir6538	0	0.421514	0	0	0.143032	0
Oas1a	13.0592	20.1572	14.2623	9.65909	9.78028	9.59824
Cerkl	1.76095	1.99213	2.30398	1.14826	1.28892	1.16737
Rpl39l	0.885316	1.69915	0.651902	0.544096	0.781791	0.546212
Tnip3	0.784373	0.799636	1.06992	0.44824	0.56351	0.504149
Fam84a	0.0620706	0.0408876	0.1299	0.00919621	0.0138744	0.00461599
2310001H17Rik	34.6581	45.1877	45.2208	26.1622	24.7955	25.8559
2020-03-03	3.86753	4.40139	4.28316	2.50605	2.56572	2.53371
Ahrr	0.189655	0.191071	0.151759	0.0826435	0.0565237	0.0730092
Snhg14	0.191619	0.189337	0.338358	0.120656	0.0785249	0.128251
1700003C15Rik	0.127324	0	0.0599928	0	0	0
Prdx4	18.328	18.9746	24.249	12.4513	12.8934	12.4674
Adk	25.5182	28.6552	33.2286	17.9431	17.7528	18.0652
Dcxr	5.11809	5.42964	6.34841	3.35842	3.36711	3.57693
Gm16432	0.126978	0.111525	0.11626	0.0376254	0.0378437	0.0283288
Slc35a3	14.8004	17.1218	16.0433	9.73355	9.94237	9.79668
Mcpt9	0.0527911	0.0230674	0.11048	0	0	0
Hspa13	10.3762	12.3189	13.3832	7.36986	7.42422	7.36023
Bves	0.0657014	0	0.120311	0	0	0
Pigf	13.2958	14.6384	14.5778	8.71557	8.8917	8.54084
Plscr1	12.6985	12.0194	13.623	7.94902	7.80533	7.8188
2020-03-10	0.0968421	0	0.088668	0	0	0
Gm13043	0.12061	0	0.064514	0	0	0
Gm16617	0.185102	0	0	0	0	0
Gm5796	0.914754	4.71049	4.79585	1.98167	2.43423	1.91472
Rpgr	1.92398	2.27593	2.17109	1.28663	1.31235	1.2269
Irg1	0.101992	0.071664	0.138741	0.0302217	0.0182383	0.0303393
Plcd1	0.556323	0.706842	0.706874	0.370905	0.296077	0.43736
Gm3002	129.136	149.69	157.695	90.2413	89.0645	90.7659
Gm10512	0.0902412	0	0.0944276	0	0	0
Mageh1	0.792999	0.381413	0.968086	0.447575	0.315121	0.449316
Hdgfrp3	15.2081	15.2683	17.6303	9.81055	9.89266	9.96689
Cysltr1	1.47085	1.1829	1.32584	0.735141	0.797504	0.817072
Mir6363	2.56083	1.32796	3.45978	0.377347	3.34683	0.712172
Obox2	0.143279	0	0.0411319	0	0	0
Lsm5	38.3145	43.6722	47.2105	27.2536	25.7631	26.9031
1700047E10Rik	1.15248	0.426115	1.00949	0.487459	0.442367	0.559303
Ccr10	0.122414	0.241913	0.304221	0.108819	0.109451	0.0819319
Fanci	4.82768	5.12496	4.49381	2.91146	2.90238	3.03136
4930433N12Rik	0.668292	0.889084	0.739467	0.463623	0.438649	0.408498
Fbxo33	25.9896	28.7538	31.2294	17.8307	17.6511	17.7354
Six3os1	0.117444	0	0.0661729	0	0	0
Apba1	0.118897	0.12873	0.124371	0.0407714	0.0426881	0.0335848
Gtpbp10	5.40154	6.672	7.94397	4.18065	3.96558	4.16354
Lama5	0.293952	0.243949	0.314855	0.142656	0.132419	0.140457
Rph3a	0.288006	0.0946148	0.283532	0.0906705	0.114207	0.0950713
Npcd	0.23886	0.0903442	0.29941	0.079637	0.102521	0.0945555
Hbq1b	0.0352882	0	0.147701	0	0	0
Snord17	3678.89	3277.66	3452.21	2170.38	2136.99	2159.28
2210408I21Rik	1.39193	1.90025	1.97895	1.07147	1.04162	1.05314
Zfp449	0.715828	0.611061	0.661823	0.362332	0.402303	0.359561
Lipa	40.4997	46.1019	50.3471	28.247	28.7573	28.1234
Zmat4	0.0811882	0.0658227	0.0588148	0.00370111	0.00372259	0.00743102
A330040F15Rik	1.50354	1.53081	1.52335	0.933474	0.796635	0.993899
4930431F12Rik	8.33793	3.20518	8.37345	4.07279	4.03626	4.18027
4930547E08Rik	0.146371	0.128558	0	0	0.0290823	0.029027
Zfp931	6.80468	7.47964	8.0935	4.59487	4.54539	4.68787
Cacybp	48.8054	64.115	49.6121	33.8455	33.8189	33.4796
Ms4a1	0.179649	0.101434	0.120846	0.0456279	0.0458927	0.0458054
Rpl39	2416.86	2544.64	2880.29	1630.98	1614.36	1640.91
Olfr1393	0.17315	0	0.0885259	0.0167123	0.0168093	0.0167774
Dync2li1	0.593804	0.420597	0.881918	0.431368	0.239771	0.398858
Podn	0.119691	0.128323	0.202034	0.042599	0.0836498	0.0420188
Cys1	0.0292633	0.0899573	0.0612419	0	0	0
Hspa12a	0.736662	0.723846	0.886463	0.420196	0.439101	0.493515
Arfip1	23.1089	25.6314	28.3339	15.9749	16.1511	15.926
Akap6	0.0694416	0.0587319	0.139917	0.0213387	0.0168634	0.0168313
Pop4	21.4817	25.7627	26.3915	14.9985	15.7332	15.1814
Hmgn3	9.82406	10.5998	11.7745	6.65127	6.96789	6.39965
Pter	0.807678	0.645829	0.955971	0.455269	0.484912	0.453905
Grip1	0.171085	0.148394	0.157975	0.0463826	0.0949257	0.0451552
Tifa	0.0731854	0.0535658	0.0638172	0.00722863	0	0
4930479D17Rik	0.107009	0.219301	0.0373244	0	0.0944012	0.0212211
Emp2	0	0.0766936	0.223048	0.0272839	0.0483898	0
Rbm24	0.35205	0.352352	0.197041	0.150411	0.165924	0.136384
Fam160a1	3.67807	3.16712	4.03585	2.30385	2.10282	2.29851
Dgki	0.149257	0.181513	0.174202	0.0816499	0.0547492	0.0683062
Snord47	34.5254	32.0999	43.3423	24.1043	20.5746	24.1594
Cpm	6.68526	6.17555	6.33571	4.04495	3.90422	3.97599
Gtsf1	0.178348	0	0	0	0	0
Camp	0.132198	0	0.0461103	0	0	0
Olfr366	0	0	0.178194	0	0	0
Rpl34-ps1	0.295417	0.889864	0	0.215838	0.206284	0.210016
Prl5a1	0.151553	0	0.0264307	0	0	0
Itga2	0.853882	0.859451	0.912669	0.502341	0.549838	0.485755
Omt2a	0.0573504	0	0.120022	0	0	0
4930433I11Rik	0.0643571	0.0254535	0.0875592	0	0	0
Zfp850	7.47954	8.9482	8.80446	5.24627	5.19861	5.30166
6430710C18Rik	0.0666133	0.102387	0.0871296	0.00986925	0.0397061	0
Klk14	0.144864	0	0.100041	0.0125635	0.0179635	0.0119941
Slamf6	72.1815	73.9059	92.9452	50.0103	50.2288	49.9992
Vmn1r48	0.116152	0	0.0607702	0	0	0
Klkb1	0.0106778	0.0187567	0.167598	0.00632798	0	0.00635259
Synj2	10.1604	10.6406	9.66334	6.29853	6.50111	6.25632
Cd226	53.9761	62.8067	66.3523	38.7006	37.604	38.9025
Mir1839	2.1695	3.17579	3.02686	1.49999	2.37081	1.29071
Tbc1d12	2.65899	3.01289	3.49762	1.8471	1.91015	1.90652
Tas2r131	0.028291	0	0.148018	0	0	0
Cst11	0.130671	0	0.0455777	0	0	0
Pip5kl1	0.159543	0.171267	0.129846	0.0630333	0.0633991	0.0527321
Ift74	1.98242	2.02674	2.13841	1.24011	1.29836	1.22309
Gm8096	0.0550172	0	0.120963	0	0	0
Gm6268	0.17597	0	0	0	0	0
Mir1983	0	0.175631	0	0	0	0
Gm10697	0.101918	0	0.0734375	0	0	0
Tdpoz5	0.101918	0	0.0734375	0	0	0
Olfr633	0.0281103	0	0.147072	0	0	0
Garnl3	0.0857251	0.0821374	0.0733926	0.00461847	0.0278716	0.00927287
Nlrp3	0.0460166	0.0221397	0.125084	0	0.0114646	0
Olfr108	0.05391	0.0676738	0.053484	0	0	0
Casp14	0.0337539	0	0.141279	0	0	0
Ifit3	14.2519	36.718	15.79	14.2414	13.8187	14.0003
Fgf9	0.347504	0.137366	0.162189	0.106084	0.0851775	0.107292
Crygs	0.0372818	0.0982343	0.0390114	0	0	0
Slc4a10	0.881249	1.04512	0.86609	0.594388	0.490459	0.57063
Galr3	0.129328	0.156976	0.305485	0.093354	0.0478957	0.122728
2810029C07Rik	0.818154	0.553666	0.870145	0.445119	0.415724	0.446851
Gm10220	0.10491	0	0.100428	0	0.0196142	0
Decr1	10.0208	10.1105	10.8721	6.52199	6.3557	6.62384
Snora61	32.7816	18.0119	21.3833	15.6428	15.4798	14.4372
Rpl22l1	351.376	365.296	404.894	238.001	233.49	238.275
Olfr1264	0.113897	0	0.0595902	0	0	0
Ift122	0.92485	0.675969	0.7918	0.451812	0.466462	0.488238
Atpif1	39.2586	40.2348	49.4404	26.6097	27.9612	27.0546
Gm14151	0.136818	0	0.0363857	0	0	0
Olfr295	0.113529	0	0.059398	0	0	0
Rnf39	0.529371	0.689406	0.630334	0.346174	0.369945	0.347521
Arhgef9	0.443075	0.298005	0.294574	0.169661	0.190554	0.187353
Olfr584	0	0	0.172625	0	0	0
Bzw2	83.6212	94.6338	111.667	61.6428	60.4327	61.8495
Snord15a	282.68	284.152	282.919	182.857	176.471	179.961
Crygb	0.0416991	0	0.130901	0	0	0
Olfr1295	0.0843308	0	0.0882431	0	0	0
Pmp22	0.0723221	0.0381124	0.0756772	0	0.00862178	0
Olfr360	0.0276683	0	0.144759	0	0	0
Tmem207	0.15446	0	0.0179584	0	0	0
Ccdc38	1.69076	1.99142	2.53576	1.27218	1.22545	1.342
Vmn1r152	0	0	0.172177	0	0	0
Tmod4	0.99967	1.289	4.09338	1.33613	1.3312	1.27818
Gpr55	5.90018	6.36031	7.22455	4.16533	3.90562	4.20001
Gja1	0.195523	0.223993	0.142326	0.0755689	0.0962761	0.0758628
Npw	0.217785	0.153025	0.0455777	0.0516263	0.0259629	0.0777406
Gnb5	3.00138	2.59444	3.302	1.89119	1.82757	1.82797
Astn2	0.123398	0.0125842	0.191824	0.0316278	0.031712	0.0357486
Zfp811	0.360047	0.167685	0.675054	0.229551	0.203264	0.222612
Fhad1	0.123042	0.18526	0.159406	0.0625016	0.0663568	0.0592589
Prl2c2	0.0668241	0	0.104886	0	0	0
Esp34	0.0934025	0	0.0781885	0	0	0
Gm14405	0.453494	0.401716	0.172646	0.189205	0.150575	0.205006
Rtn1	0.0726733	0.0425528	0.101393	0.00717805	0.0144394	0.00720597
D130043K22Rik	0.334121	0.384199	0.449568	0.19801	0.224923	0.211401
Ms4a7	0.0755778	0.0165951	0.079084	0	0	0
Akr1e1	5.69405	5.55112	7.47116	3.86319	3.93875	4.00419
Moxd2	0.184485	0.224354	0.252442	0.109331	0.0845889	0.118199
Mpp5	11.0893	12.5856	12.5031	7.59801	7.76874	7.56165
Gm15421	4.1731	4.1604	3.66801	2.71238	2.2971	2.52498
Olfr96	0.224166	0.270718	0.146603	0.0996354	0.0835114	0.116527
Ctla4	227.129	227.697	272.832	154.016	155.394	154.035
D830005E20Rik	7.58457	2.22542	7.00268	3.67639	3.26539	3.66114
Olfr1085	0.112083	0	0.0586413	0	0	0
Olfr165	0.112083	0	0.0586413	0	0	0
Gm6093	2.22035	0.978226	2.03147	1.10058	0.963743	1.16158
C1qtnf9	0.235798	0.255832	0.377363	0.156181	0.181891	0.107276
Mir3473g	0	0.170465	0	0	0	0
Mir8090	0	0.170465	0	0	0	0
Gm4841	5.1316	5.87187	5.53628	3.44124	3.50329	3.49679
Olfr951	0.111727	0	0.0584552	0	0	0
Bbs2	5.24003	5.437	5.45524	3.37909	3.37223	3.4345
Fank1	0.290223	0.186026	0.0869966	0.0567522	0.0979736	0.0966492
Olfr220	0	0	0.169448	0	0	0
Ddx43	5.60448	4.5633	5.27745	3.15652	3.40205	3.20442
Zc2hc1a	0.290579	0.337989	0.33693	0.186168	0.149799	0.172875
Osbpl3	8.39843	8.16818	6.41824	4.91469	4.77632	4.89168
4930412B13Rik	0.0827446	0	0.0865833	0	0	0
Tmx4	15.2834	15.667	15.3924	9.90045	9.723	9.89698
Rundc3a	10.5231	8.68098	10.1463	6.39011	6.0404	6.22837
1700039E15Rik	0.137159	0	0.0318939	0	0	0
Tmem45a	0.0684836	0.0945205	0.0511862	0.0115958	0.0116631	0.00582046
Snora68	145.983	94.1525	104.562	74.3829	71.9247	74.1915
Cdkn1a	0.192893	0.314635	0.173008	0.0979836	0.12319	0.106562
Olfr46	0.0221811	0	0.146224	0	0	0
Cybb	10.7901	8.37678	10.345	6.29649	6.32018	6.17879
Tmem106b	37.5436	40.8906	45.5672	26.5408	26.1712	26.6465
Cx3cr1	0.915088	0.274333	1.2032	0.449318	0.505963	0.470564
Mid2	0.401555	0.501874	0.518227	0.245905	0.281906	0.276061
Gm13247	0.357217	0.197224	0.268729	0.137358	0.13595	0.147157
Obp2a	0.0357663	0.251309	0.112277	0.0847846	0	0.0638358
Olfr746	0.167591	0	0	0	0	0
Ispd	0.618335	0.342821	0.502028	0.289145	0.271435	0.270919
Ankrd55	5.67047	6.54801	6.32735	4.00745	3.88482	3.9037
Hck	0.0876928	0.011003	0.091761	0.00742418	0	0.00745306
D330023K18Rik	1.69971	2.2393	1.62163	0.880201	1.43032	1.15308
Gm30498	0.16706	0	0	0	0	0
Atg4c	0.906456	0.610288	0.546982	0.379833	0.42647	0.412288
Slc4a8	1.69179	1.80781	1.76241	1.08189	1.12958	1.06217
4933402D24Rik	0.210443	0.105619	0.0314579	0.0356327	0.0358395	0.0447141
Gm10058	0.0789788	0	0.0876137	0	0	0
Gm4027	0.166361	0	0	0	0	0
6030471H07Rik	0.0537587	0	0.112505	0	0	0
Mmp14	1.16407	0.704247	1.06917	0.627397	0.606986	0.549354
4930546C10Rik	0.170514	0.0998419	0.0951596	0.0538941	0.0406551	0.0338148
Ccdc53	31.2596	35.1428	39.5845	22.9574	21.597	23.5632
Mipol1	6.57274	6.49642	7.18502	4.05259	4.72223	4.15843
Olfr801	0.165765	0	0	0	0	0
Oaf	0.232122	0.135915	0.138794	0.0659642	0.100871	0.053003
Melk	2.69028	3.06299	3.27005	1.82506	2.00967	1.87527
Sprr2e	0.12239	0	0.0426895	0	0	0
Lpxn	102.154	105.759	111.917	69.2681	67.5611	69.4341
Tspan17	0.353737	0.606583	0.49353	0.219618	0.391581	0.220472
4930511A02Rik	0.0409233	0.0239621	0.0999176	0	0	0
Lbhd1	0.100992	0.133052	0.210873	0.0599866	0.0604715	0.0603565
Olfr287	0.274508	0.137977	0.172937	0.0713437	0.0911588	0.109112
Tmem38b	2.54914	2.36897	2.78103	1.59905	1.6322	1.63348
BB287469	0.0701599	0	0.0944544	0	0	0
Olfr59	0.0397523	0	0.124789	0	0	0
Cyp2j5	0.414405	0.165033	0.349431	0.162854	0.171298	0.16009
Fpr2	0.142568	0	0.0213118	0	0	0
Trnp1	0.0789813	0.0416217	0.115703	0.0187226	0.00941564	0.0187955
Mir684-1	186.162	191.564	236.71	130.09	137.054	130.23
Ttn	20.1388	24.1081	16.4777	13.0751	12.9896	13.1129
Zfp760	4.27665	5.3071	7.42651	3.59434	3.77732	3.53057
Krtap5-2	0.123024	0	0.0404745	0	0	0
Fut10	1.50065	1.21551	1.77091	0.928855	0.874613	0.996947
Gm15080	0.15598	0	0.00721471	0	0	0
4930556J02Rik	0	0	0.163191	0	0	0
Zfp677	12.7312	15.1063	18.9663	10.3321	9.67909	10.2076
Olfr323	0.162935	0	0	0	0	0
Slc10a3-ubl4	0.999638	1.53129	1.64524	0.884067	0.759961	0.957256
Spin2c	10.0768	10.5841	11.5658	6.97598	7.11161	6.70638
Ms4a4d	1.39076	1.12705	1.43699	0.919118	0.745004	0.795685
Gm10319	0.0584869	0	0.1038	0	0	0
Olfr1065	0.106434	0	0.0556856	0	0	0
Kcnma1	0.0990018	0.066481	0.112984	0.0124769	0.0332259	0.0300611
Gm14403	2.17823	1.71851	2.46081	1.32465	1.44332	1.25768
Cd200	21.6816	21.044	23.9578	14.3917	14.3818	14.4543
B230216N24Rik	0.582584	0.432965	0.375145	0.331977	0.17363	0.293276
Gm12171	0.161441	0	0	0	0	0
Gm5148	0.268518	0.339449	0.559221	0.193635	0.284499	0.176682
Clec4a3	0.0837954	0.0551983	0.0219207	0	0	0
Esx1	0.0658663	0.0116275	0.0979957	0	0.00954729	0
Gm21859	0.0740062	0.0866665	0	0	0	0
Spo11	1.20018	0.880841	1.25242	0.654067	0.696866	0.715299
Nucb2	9.74806	11.721	9.90949	6.81558	6.67987	6.84264
9530036O11Rik	0.104734	0.0926222	0.0687198	0.0306867	0.0148947	0.0232924
Sult5a1	0.136529	0	0.0238104	0	0	0
Prr9	0.0669371	0	0.0933899	0	0	0
Glrx3	48.9469	49.4755	56.2136	32.8152	34.1987	33.6741
A630089N07Rik	157.148	76.0508	165.336	86.5601	87.4602	85.6684
Ly86	0.203063	0.420415	0.185611	0.178236	0.100524	0.144435
Bcam	3.83815	4.05491	3.74082	2.59305	2.22897	2.66185
Lhfpl4	0.235087	0.117613	0.25431	0.0936537	0.0924206	0.105545
Irf6	8.67737	11.6419	13.4297	7.38308	7.04969	7.48387
Myog	0.0869418	0	0.0727802	0	0	0
Rtf1	13.8988	12.6788	12.8364	8.49936	8.66225	8.46243
Ccdc102a	0.365811	0.150606	0.299048	0.142268	0.143094	0.142822
Them5	0.126597	0	0.0662352	0.0108787	0	0.0110465
Ces2c	5.93659	6.32243	10.3522	4.94756	4.6682	5.05239
0610009B22Rik	5.86711	5.81886	6.45684	3.92899	3.74062	4.08333
P2ry10	168.237	196.175	214.379	125.841	125.923	126.473
Plscr4	0.194383	0.1565	0.22035	0.110397	0.0579326	0.101189
Nars2	5.5857	5.9712	9.56036	4.57416	4.57804	4.5503
S100a4	58.0908	75.6959	76.9916	45.9702	45.2684	46.468
Mup5	0.0444971	0	0.114345	0	0	0
Ssxb6	0.158778	0	0	0	0	0
P2ry2	0.0456197	0.0400679	0.114567	0.00540711	0.0163155	0.00542814
Morn1	0.905807	0.697871	0.881315	0.442631	0.625174	0.453807
Skint7	0.167295	0.135865	0.180194	0.0881815	0.0388338	0.0855055
Rbm3	489.924	492.862	574.071	336.493	343.721	338.306
Olfr653	0	0	0.158433	0	0	0
Mrgpra3	0.13208	0	0.0262337	0	0	0
Gkap1	0.477747	0.539195	0.442243	0.293238	0.29494	0.263926
Fam199x	8.44368	9.32954	8.30171	5.64905	5.55031	5.77497
Pxdc1	0.0987013	0.222916	0.118035	0.0584932	0.0672373	0.0587207
Cpd	7.92847	7.87913	7.22072	4.94647	4.98842	5.04804
2700099C18Rik	1.36346	1.24772	2.08245	1.03058	0.996211	0.94468
Mir425	0.310536	0	0.974826	0.184032	0.1851	0.369497
Rab3il1	0.0568869	0.049964	0.0714312	0.00674257	0	0.0067688
Fam111a	40.727	50.0355	52.2415	31.5722	30.8375	31.2335
P2rx3	0.151885	0.0566026	0.137573	0.0307628	0.0563629	0.0364294
Gm6083	0.11714	0	0.0404495	0	0	0
Gm5122	0.0161243	0.0566482	0.0843619	0	0	0
Cd59a	0.135264	0.0128297	0.0764252	0.0259703	0.000957769	0.0173809
Pfdn4	15.1172	19.2369	18.3105	11.2353	11.8844	11.3512
Stxbp6	0.114432	0.0560151	0.137174	0.0319365	0.0428898	0.0240728
Nudt12	0.173655	0.0813449	0.205939	0.0686086	0.0690067	0.0619879
Gm12018	20.6767	10.6531	22.2026	11.7961	11.5501	11.7126
Epgn	0.046471	0.0816313	0.210717	0.0550801	0.0184666	0.0460787
Lhb	0.363003	0.0455467	0.217054	0.122929	0.154553	0.0308519
Bckdhb	13.8371	15.3021	16.7048	10.1348	9.9322	9.9797
Inppl1	5.9673	7.91687	7.10992	4.56242	4.51243	4.62932
4930503E14Rik	0.114674	0.0169064	0.0244274	0	0	0
4930449I24Rik	0.113899	0	0.0420922	0	0	0
Ankrd37	5.97783	6.60334	7.7966	4.60264	4.18519	4.51824
Gm7714	0.115601	0	0.0403213	0	0	0
Rhox4b	0	0	0.15587	0	0	0
F2r	35.001	32.7917	36.5755	23.0284	22.6889	22.8839
Gm2022	0.0489665	0	0.106721	0	0	0
AY358078	0.0379402	0	0.15105	0.010921	0	0.011071
Btla	66.6848	75.9439	84.6103	49.8067	49.7742	50.0443
Stbd1	0.026595	0.0233585	0.153058	0.00788048	0.0158524	0.00791114
Mir5113	0	0	0.154942	0	0	0
Luc7l3	57.0233	62.3771	62.7231	39.8295	40.0952	40.0749
Zfp260	49.5897	62.8239	64.4579	38.9866	38.3935	39.1784
Pate2	0.083417	0.0104665	0.0748174	0	0	0.00921656
Ndrg4	0.378754	0.372263	0.443507	0.22446	0.258015	0.203873
Cyp2w1	0.0872868	0.0306657	0.0365345	0	0	0
Bnip3	5.14082	5.13571	5.77253	3.47419	3.39579	3.62185
Gm19784	0.0719704	0	0.0997447	0	0.0114094	0
Bcl2a1b	79.2844	78.4029	105.035	57.8327	57.8333	57.6742
Svip	0.283085	0.30891	0.296218	0.152513	0.153398	0.178624
Mnat1	13.5718	15.1038	16.7261	9.91651	9.99403	9.96762
Gem	4.03476	4.07788	4.30761	2.75845	2.51653	2.82484
Scarna13	748.229	919.609	926.56	572.927	564.016	576.446
Plau	0.496479	0.54035	0.625843	0.294295	0.393372	0.30871
Nxt2	2.43523	3.03557	3.8087	2.0398	1.93856	2.04938
Icos	74.7302	91.7098	94.6385	57.6162	57.443	57.3045
Gm10474	0.0384915	0.101422	0.100693	0.0171084	0.0229435	0.0171749
Olfr631	0.220093	0.0776591	0.138509	0.0500321	0.110896	0.0256301
Lefty1	0.162897	0.170087	0.0340568	0.0487028	0.0354053	0.0567344
Retnlb	0	0	0.153872	0	0	0
Mir6516	391.854	354.283	336.714	237.485	239.683	238.552
Scarna6	718.533	718.775	801.126	503.705	483.447	492.746
Ctsh	0.146011	0.0854946	0.0679043	0.0384579	0.00967028	0.0482594
Gpr174	54.2107	62.9361	65.6279	39.9708	40.7122	40.1174
Tspan6	1.79663	2.30242	1.89565	1.16234	1.44574	1.25593
Defb6	0.0817199	0.0717749	0	0	0	0
Olfr876	0.100746	0	0.0527101	0	0	0
1700047G03Rik	0.125693	0.0275992	0	0	0	0
BC061237	0	0	0.15328	0	0	0
Ccdc63	0.0771423	0.101632	0.22871	0.0304779	0.0919642	0.0458946
Scgb2b7	0.153166	0	0	0	0	0
2310081J21Rik	0	0	0.153161	0	0	0
H2-Q2	4.43925	3.5462	4.43654	2.63296	2.98565	2.50587
4930522H14Rik	0.121289	0	0.031729	0	0	0
Fbxw8	9.73522	8.97945	9.80429	6.25019	6.34971	6.19248
Bbs5	0.105471	0.114364	0.35036	0.0881903	0.110878	0.0774667
4932416K20Rik	0.291791	0.0273166	0.248783	0.112438	0.0693762	0.0932236
Pmch	0.111863	0.0409117	0	0	0	0
Vmn1r159	0.0922981	0	0.0604753	0	0	0
Dlx4	0.0435091	0.0636904	0.0455276	0	0	0
4732491K20Rik	0.440757	0.270253	0.269761	0.192208	0.188366	0.168218
Rwdd3	1.63841	1.62518	3.39194	1.40373	1.50753	1.3987
Olfr420	0.126174	0	0.0264054	0	0	0
Gm6460	0.174899	0	0.120102	0.00895505	0.0762722	0.00918116
Il1a	0.244433	0.263073	0.302646	0.115538	0.186029	0.134443
Slc28a3	0.348664	0.266265	0.312382	0.162973	0.179531	0.171278
Ces2g	0.507045	0.497723	0.529409	0.289821	0.289741	0.336647
1810009J06Rik	0	0	0.290398	0.0548227	0	0.0366907
Zfp938	8.02588	9.74429	9.65846	5.97752	5.99563	6.12108
Mpp2	0.471576	0.811639	0.713508	0.415466	0.368458	0.43983
Smok3b	0.141999	0.0118353	0.0324663	0.0134215	0.00931458	0
4930482G09Rik	0.0637573	0.167715	0.0333576	0.0188922	0.0370536	0.0189657
Smim15	54.6742	63.6236	72.5027	41.8344	42.6351	42.0993
Chac2	3.72599	3.53505	3.89884	2.32621	2.66038	2.3234
Gm6164	0.0474206	0	0.104323	0	0	0
Gm8653	0.0474206	0	0.104323	0	0	0
Mc3r	0.0701399	0.00477277	0.106458	0.00298184	0.014036	0.0026941
Amer2	0.117418	0	0.0831114	0.00630906	0.0135623	0.0126051
Ikzf2	131.973	141.747	136.565	91.1689	90.167	91.0958
Slc35f5	0.569176	0.553471	0.675346	0.33731	0.369559	0.386997
Ccdc50	23.3971	25.5585	25.9967	16.7271	16.2782	16.7143
Adgrf2	0.0964808	0.0423697	0.0841306	0.0190591	0.00958485	0.0191332
Mir6916	0.837954	0	0.438414	0	0.499477	0.249264
Olfr39	0	0	0.150929	0	0	0
Asf1a	18.4721	20.9734	19.0384	12.926	12.8522	13.048
Vmn2r-ps54	0.0944231	0.0235603	0.128557	0.0211961	0.0213192	0.0212786
Mthfd2	31.0626	32.506	33.6589	21.1284	22.2642	21.2263
Pbx4	1.41786	0.831118	1.19911	0.771203	0.811684	0.612429
2010300C02Rik	0.302632	0.33927	0.335672	0.175761	0.198428	0.176445
Ccdc88a	0.577831	0.523207	0.504903	0.326553	0.309522	0.333139
Sult4a1	0.0755392	0.0473902	0.0564597	0	0.0192971	0
4930504C09Rik	13.1515	6.8855	13.2218	7.21201	7.51623	7.32393
Gm20917	0.150381	0	0	0	0	0
Olfr1248	0.073457	0	0.0768648	0	0	0
Amdhd1	0.261666	0.306429	0.399299	0.206761	0.162469	0.175133
Lrp3	0.137544	0.14418	0.1919	0.06984	0.0919589	0.0536909
Tpbpb	0	0	0.150109	0	0	0
Vps13a	40.0094	48.7781	47.0304	29.945	30.3928	30.0994
Gm2897	10.8081	14.0766	15.6615	8.85965	9.00012	9.07717
Krt24	0.0625116	0.0686302	0.0327058	0	0.0093153	0
Trim68	7.16127	10.6845	9.36192	6.20734	5.86665	5.97513
Plxnb2	0.262417	0.177813	0.254211	0.136775	0.0917126	0.134898
Cyp2c66	0.0625072	0	0.101669	0	0.00965248	0
Ube3a	48.9407	57.9076	60.4591	37.246	37.112	37.1679
2610305D13Rik	0.108513	0.0225893	0.0313085	0.002429	0	0.00615708
Ifi30	13.9293	13.9102	11.8373	8.36754	9.43697	8.58422
Vmn1r223	0.0729159	0	0.0762986	0	0	0
Ccdc150	0.145602	0.22349	0.181377	0.0862879	0.099187	0.0824986
Rpl9	2476.04	2546.01	2978.78	1776.24	1788.8	1778.64
Halr1	0	0	0.149029	0	0	0
0610039H22Rik	2.20565	3.23931	3.51872	1.94999	2.00441	1.93606
Twist2	0.0804742	0.0706808	0.105259	0.0119228	0.0479681	0.0119692
Cfap36	12.8262	13.9739	16.5864	9.75746	9.39147	9.75418
Mrgpra1	0	0	0.148763	0	0	0
Gm12238	3.41013	3.9262	3.78662	2.64918	2.03013	2.65948
LOC100861615	13.1466	15.8424	17.3396	10.7742	9.50777	10.6102
A430033K04Rik	19.6895	10.2465	19.6453	10.8405	11.2272	11.0018
Bcat1	1.2452	1.26627	1.20218	0.779851	0.836789	0.768914
Btnl4	0.706879	0.654424	0.711284	0.375924	0.49059	0.42233
Prl3a1	0.061768	0	0.0861781	0	0	0
Xlr5a	0.409371	0.244619	0.277875	0.217387	0.125201	0.182638
Nubpl	4.89283	5.69216	5.61384	3.64998	3.40254	3.70248
Slc25a24	9.10502	9.52023	10.5733	6.63381	6.20552	6.62648
Mthfd2l	1.83692	1.93194	2.60775	1.38677	1.37417	1.41305
Kcnh2	3.25747	4.34972	3.9358	2.58575	2.42513	2.62565
Tal2	0.0922921	0.0405302	0.0965737	0.0273475	0	0.0274539
Olfr1229	0	0	0.147543	0	0	0
2900041M22Rik	0.589186	0.96597	0.822026	0.465558	0.561912	0.467369
6330403K07Rik	4.72392	4.59103	4.45047	2.93422	3.35707	2.8394
E230029C05Rik	0.0917042	0.0536961	0.191917	0.0181155	0.0911033	0.018186
Pdp1	6.93371	8.34988	8.79683	5.3566	5.46304	5.23145
Dsel	3.27482	3.11766	3.92039	2.28005	2.29058	2.25077
Snord22	161.935	154.003	142.2	102.671	103.66	101.023
Serpina3c	0.0691907	0	0.0777938	0	0	0
A930015D03Rik	8.36696	9.12708	7.19124	5.39607	5.99174	5.08647
Gzmg	0	0	0.146759	0	0	0
Olfr539	0	0	0.146732	0	0	0
4930406D18Rik	0	0.100651	0.0799423	0	0.0227692	0
Olfr11	0	0	0.146603	0	0	0
Anxa5	40.0641	42.5252	42.2565	27.3619	28.8237	27.5948
Efcab11	0.510305	0.549048	0.52063	0.347785	0.288968	0.326368
Olfr376	0	0	0.146487	0	0	0
Gm21276	0.0718179	0.0373621	0.0372489	0	0	0
Fam92a	12.8346	13.7828	17.219	9.69526	9.80856	9.86103
Olfr1387	0.0282004	0	0.118035	0	0	0
Rpl38	2020.04	2146.77	2476.17	1488.61	1483.8	1495.22
Apol10a	0.0890295	0	0.0570068	0	0	0
Gm11426	0.0475595	0	0.0995318	0	0.000850462	0
Ggps1	31.6416	32.3055	37.1698	22.4066	22.8848	22.6627
Gm2087	0	0	0.145752	0	0	0
Trim72	0.0691922	0	0.137542	0	0.0410523	0
Me3	0.462375	0.162654	0.468909	0.252718	0.131233	0.254312
Rpph1	51143.4	66192.4	71684.4	42597.8	42318.1	42319.4
Rasd2	0.101637	0.0169956	0.0904287	0	0.0259239	0.0167654
Olfr231	0.0856998	0	0.0597837	0	0	0
Olfr796	0.0565821	0	0.0888105	0	0	0
4930487D11Rik	0.0774063	0.0679862	0	0	0	0
Ftmt	0.126467	0	0.0189049	0	0	0
Ifna14	0	0	0.145369	0	0	0
Arrdc4	23.6011	21.6039	16.0138	13.4792	14.1542	13.508
Mettl7b	0.107561	0.0755771	0	0.0127488	0	0.0127984
Rps3a1	2855.66	3161.89	3708.23	2185.34	2178.62	2189.64
Mboat2	0.0565215	0.115834	0.197145	0.039079	0.0729964	0.039231
1700125G22Rik	0.189766	0.13463	0.236102	0.127177	0.0434911	0.109433
Fbxw16	0	0	0.144987	0	0	0
Redrum	0.0829303	0	0.061984	0	0	0
B3gnt5	4.65389	5.41768	6.3851	3.62933	3.65699	3.71251
Gm5820	0.100054	0.112365	0.120862	0.0487808	0.0339562	0.0443033
Zbed5	1.81867	1.43221	1.97187	1.16856	1.18109	1.07613
Syt11	21.9729	22.3479	23.5888	15.2826	15.0876	15.3544
Mapk12	1.86819	1.49687	1.6385	1.12496	1.10672	1.04691
Vmn1r46	0.0851469	0	0.059398	0	0	0
Olfr93	0.0562205	0	0.0882431	0	0	0
Olfr424	0.0278434	0	0.11654	0	0	0
Gm13251	6.3001	8.67367	7.86121	5.33324	4.65156	5.33863
Lmna	1.51519	1.6957	3.04298	1.39761	1.23092	1.49755
Olfr1451	0.0848731	0	0.059207	0	0	0
Cnep1r1	10.2585	10.1743	11.051	6.93336	7.25727	6.98605
Rps21	1842.22	1899.1	2259.12	1350.32	1352.61	1353.95
4930558J18Rik	0.914068	0.845422	0.916227	0.538272	0.603579	0.570825
Zfp759	5.85857	6.33772	7.40459	4.39273	4.43454	4.3331
Vmn2r-ps60	0.143432	0	0	0	0	0
Agpat9	0.522956	0.483489	0.547217	0.337105	0.295311	0.322041
Olfr191	0.113529	0	0.029699	0	0	0
Olfr27	0.0253559	0	0.117803	0	0	0
Cd69	110.21	106.993	145.578	82.2623	80.5862	82.6512
2410007B07Rik	0.818492	0.397107	0.70028	0.269159	0.658642	0.272338
Zfp101	6.35909	7.26025	7.61651	4.72502	4.74806	4.80843
Gm20767	0.990526	0.560331	0.885313	0.525518	0.548414	0.478921
Barhl2	0.108348	0.0267768	0.0370007	0	0.019726	0
Cyyr1	0.174457	0.0742777	0.143733	0.0442763	0.064867	0.0598049
Fsip1	0.0631095	0.0277146	0.0660372	0	0.00940439	0
Dmwd	0.125693	0.0551983	0.164405	0.0372447	0.0624347	0.0373895
Itga9	0.449762	0.464739	0.486454	0.290139	0.286566	0.275501
Klk1b27	0.681712	0.667074	0.90006	0.509577	0.42316	0.493895
Olfr967	0.113164	0	0.0296035	0	0	0
Bcl11a	0.0292159	0.0254063	0.173439	0.0245141	0.00862112	0.0246955
4930519D14Rik	0.0697065	0	0.0729403	0	0	0
P4ha3	0.24249	0.0480162	0.188813	0.0789095	0.0565768	0.093051
Parpbp	0.573528	0.764767	0.845046	0.418232	0.589791	0.376575
Hddc2	15.5498	18.1785	20.1188	11.9824	12.3125	12.1386
Serpinb6b	21.1066	20.9844	24.6091	14.6344	15.3691	15.1506
Olfr263	0.0553366	0	0.0868556	0	0	0
Gm11554	0	0	0.142188	0	0	0
2020-09-07	180.63	204.83	213.947	135.936	135.294	135.415
C030013G03Rik	0.0543398	0.0954536	0.0284303	0.0122373	0	0.0122849
Osbpl1a	0.186729	0.228436	0.223305	0.114613	0.111303	0.111092
Cage1	0.910191	0.925071	1.61622	0.762796	0.745302	0.738414
Olfr123	0.141911	0	0	0	0	0
Nbn	17.7595	20.335	21.8287	13.5453	13.6935	13.3459
Bhmt	0.0887885	0	0.05309	0	0	0
Nudt14	15.5268	15.6796	19.0868	11.1131	11.3674	11.5723
Zfp758	20.2075	24.0842	22.5692	15.2289	15.2137	14.8617
Vmn1r95	0.14169	0	0	0	0	0
Adamts20	0.0713032	0.0512393	0.0474798	0.00768297	0.00386378	0.00771286
Defb5	0	0	0.141641	0	0	0
Rragd	6.65694	6.72867	6.99625	4.48287	4.7465	4.52194
Socs2	34.5653	41.8203	38.4804	25.9826	25.9961	25.9683
Paqr3	1.77628	1.58489	1.76768	1.08077	1.14426	1.16492
Gm5592	0.0650968	0.0228546	0.0532731	0	0	0
Insl6	7.39875	6.46322	5.64956	4.26621	4.3148	4.59212
Cxcl11	0.32941	0.118589	0.419378	0.159449	0.174	0.160461
Smpdl3a	143.017	153.534	165.356	104.107	105.874	104.099
Olfr463	0.141002	0	0	0	0	0
Gm19522	2.20137	2.82231	2.91485	1.69436	1.94648	1.66371
Kif20b	6.50043	6.09225	7.00054	4.34853	4.58459	4.30332
Ckm	0	0.0983037	0.126877	0.0331649	0.0111191	0.0130956
Pdzk1ip1	3.51514	4.26617	4.4473	2.746	2.78099	2.69965
Stom	0.854293	1.02209	0.884509	0.631265	0.529666	0.622735
Olfr1173	0.140551	0	0	0	0	0
Pam	3.82032	4.18746	3.56305	2.60739	2.53413	2.64308
Gm14625	0.124262	0	0.0514158	0.0240658	0	0
Ugt1a1	0.0873039	0	0.0530333	0	0	0
Pvt1	9.75046	11.1566	11.2444	7.17837	7.22059	7.41901
Vmn1r174	0.140104	0	0	0	0	0
Arsi	0.0919705	0	0.0481186	0	0	0
Ces2b	0.321799	0.361815	0.254821	0.19398	0.198973	0.151451
Phyh	29.6368	33.6111	36.4832	22.0604	23.462	22.3913
Defb22	0	0	0.176768	0	0	0.0251258
Try10	0	0.0213599	0.118549	0	0	0
Pklr	0.12597	0.0510645	0.0304186	0.0114851	0.0115518	0.0230596
Gemin6	5.29855	5.4009	7.01947	4.11955	3.75229	4.12111
Ifit2	29.0946	40.2199	26.9836	21.9293	21.925	21.7647
BC051142	0.227875	0.186801	0.174861	0.108036	0.099608	0.0994185
Bco1	0.343973	0.0837824	0.280691	0.142939	0.129197	0.116282
Fcrla	0.0627718	0.0137832	0.131368	0	0.0374163	0.00933627
Exoc6	31.1694	32.1615	40.1534	23.3641	23.7809	23.4082
Ephx4	0.836626	0.955254	1.11618	0.520599	0.78543	0.584841
Gm2381	0.227423	0.31279	0.30643	0.143721	0.175096	0.164358
Tmevpg1	0.871218	0.63511	1.01019	0.530263	0.53334	0.560343
Hepacam2	0.346235	0.238469	0.284106	0.132921	0.211094	0.154508
C1d	12.487	13.5639	15.3092	9.65608	9.0864	9.42232
Chm	17.5122	21.2959	22.9271	13.9275	14.0367	14.1239
Txndc15	21.6226	23.0192	25.7898	15.7535	16.2914	15.9866
Dennd2d	55.8941	53.6395	59.5587	38.809	38.036	38.6389
Olfr1502	0.138778	0	0	0	0	0
Olfr1507	0.0777197	0	0.0609939	0	0	0
A730085K08Rik	0.233176	0.204799	0.146396	0.138187	0.0555955	0.11098
Tmem128	45.8827	46.6228	53.5346	33.3757	33.3226	33.0871
Abracl	124.532	136.882	156.491	96.1291	93.4483	96.2179
Tdpoz3	0.0240397	0	0.114455	0	0	0
Tnfaip8	35.2729	42.4102	47.2474	28.6117	28.3605	28.418
Cdk5rap1	8.25363	11.6858	19.9089	8.91717	9.1447	9.11128
Gm5108	2.65997	1.66766	3.48023	1.74404	1.83906	1.66753
Zfp119a	10.8341	14.0832	14.0623	8.62306	9.4338	8.53396
Crbn	52.0348	63.1319	68.0765	42.0898	41.1725	42.0985
Gng10	42.9163	49.4922	59.5558	34.4426	34.4587	35.0537
Trnt1	43.3297	48.1492	54.141	33.5347	32.8706	33.2111
Slc9b1	0.223392	0.0722864	0.102114	0.0572058	0.0560661	0.0645632
Mir680-2	4.23288	2.52909	3.76637	2.39476	2.86207	1.85874
Gm2837	0.0542839	0	0.0933686	0	0	0.00666091
Olfr1002	0.137908	0	0	0	0	0
Rnf2	47.7148	52.3691	54.5737	35.46	34.8237	35.5772
Zfp472	17.6534	20.3008	22.6324	14.2302	13.1695	14.0168
Emc2	33.7545	38.6202	41.6409	26.0017	25.442	26.5822
Mospd1	6.7249	7.87417	9.16494	5.60815	5.19536	5.38581
Crebrf	34.3705	39.6518	40.7034	26.2841	26.0113	26.2255
Rhox8	4.98801	0.581697	4.40318	2.25951	2.39395	2.08626
Esco1	47.9763	55.7883	60.3449	37.4943	37.0781	37.813
Ctss	325.261	368.193	366.079	242.154	239.835	244.23
Trp53inp1	203.374	235.966	232.24	154.101	152.11	154.105
Gm13139	12.9414	14.3805	15.6145	9.64833	10.1447	9.54837
Scgb2b20	0	0	0.137569	0	0	0
Myeov2	76.2949	77.1192	91.3415	56.189	55.8039	55.7296
Olfr691	0.10896	0	0.0285037	0	0	0
Olfr790	0.10896	0	0.0285037	0	0	0
Cct6b	0.305067	0.484846	0.304018	0.275492	0.138545	0.241993
C4bp-ps1	0.0700147	0.0307471	0.0366314	0	0	0
Sfrp2	1.17401	1.80739	1.3113	0.985001	0.841324	1.02407
Penk	17.6275	18.5209	17.6025	12.254	12.2857	12.2471
Crxos	0.220089	0.0464058	0.0429594	0.0435829	0.0314937	0.0431152
Pcmtd1	31.12	37.1288	38.2619	24.1017	24.2638	24.6274
Cyp2c69	0.0547297	0	0.0823921	0	0	0
6720489N17Rik	1.81927	1.53987	2.35336	1.28522	1.17202	1.36957
Immp2l	5.01583	5.70114	5.34447	3.57779	3.73384	3.61872
Rps7	1983.91	2105.4	2502.18	1513.47	1499.13	1512.11
Vmn2r37	0.065691	0	0.0713207	0	0	0
4930461G14Rik	0.101521	0	0.0354104	0	0	0
Lipo1	8.68046	10.4253	8.51106	6.26699	6.4729	6.13116
Ckap2	1.35986	1.46177	1.94328	1.10624	0.949698	1.12262
Gm15881	0.108401	0	0.0283574	0	0	0
Amph	0.163187	0.250824	0.110993	0.0967095	0.0778166	0.0922314
AU041133	12.8967	14.4046	14.8142	9.87329	9.3955	9.57765
Depdc1b	0.521651	0.375698	0.502183	0.315328	0.236314	0.316555
Cln5	14.0217	15.6703	16.3434	10.1923	10.7814	10.5786
Olfr1383	0	0	0.147543	0.00768768	0	0
Armc12	0.191445	0.105092	0.150245	0.07091	0.0855859	0.0569487
Arhgap29	0.961717	1.23346	0.824567	0.684131	0.619226	0.679235
Mir7676-1	0.136235	0	0	0	0	0
Mir7676-2	0.136235	0	0	0	0	0
LOC100040786	0	0	0.232861	0.0265356	0	0.0399583
Cyb5a	159.008	169.349	216.757	124.674	124.944	125.243
Hsd17b7	2.94708	2.80648	3.94942	2.17101	2.18302	2.2271
Nipsnap1	15.8176	18.1359	18.8654	12.1887	11.8826	12.1775
Noxred1	0.80383	0.706007	1.19322	0.598236	0.579422	0.589441
1110058L19Rik	14.5469	15.0434	15.8355	10.4517	10.4424	10.283
Tmem114	0.037547	0	0.0982222	0	0	0
Rragb	3.65969	3.58598	4.15342	2.58756	2.56318	2.60443
Apol11b	0.109329	0.0805836	0.082444	0.0232702	0.0399266	0.030995
Gm11538	0.0542839	0.0238389	0.127805	0.00804255	0.0323569	0.00807383
Znf41-ps	10.4605	11.471	11.119	7.67202	7.22582	7.78098
Npm1	707.995	762.902	859.163	535.964	531.171	538.223
Phldb2	0.0192107	0.0506185	0.0904588	0.00284621	0.00858818	0.00571456
Rplp2-ps1	13.594	13.9631	13.8617	9.54658	9.44352	9.45568
Gm15284	0.135362	0	0	0	0	0
Cdh10	0.03876	0.0544688	0.0486697	0.00459405	0	0
Npnt	0.138692	0.0552103	0.197449	0.0507992	0.0713953	0.0543966
Pdcl	18.3079	20.2884	22.2294	13.7274	14.352	13.7589
AA987161	16.5636	17.7141	19.8148	12.6836	12.2023	12.3113
Dydc1	0.0795845	0	0.0555177	0	0	0
4930470H14Rik	124.653	47.4446	122.846	66.5094	69.5832	67.1919
Vax2os	0.0800714	0	0.1173	0.0261938	0	0.0167683
Rbm7	67.0174	76.6336	87.1028	53.0883	52.8136	53.1425
Gm16367	0	0	0.134914	0	0	0
Gm5124	0.39747	0.723671	0.514642	0.357685	0.294675	0.383088
Ssxb10	0	0.0412382	0.0935366	0	0	0
Anapc10	5.21448	5.60867	5.73595	3.80523	3.68946	3.83836
Zfp85	10.0854	11.972	13.8556	8.24933	8.41659	8.02647
4930511A08Rik	0.134671	0	0	0	0	0
Anxa2	13.9481	18.6949	17.8304	11.6389	11.7341	11.3869
Gm8300	0.0535807	0	0.0808536	0	0	0
Arl14epl	0.112419	0.0395158	0.172211	0.0619584	0.0213562	0.0477328
Rps17	1676.67	1888.85	2094.18	1309.21	1293.64	1305.96
Vwa5a	23.2549	26.116	28.6961	18.3774	17.5547	17.9109
Chmp4c	0.221192	0.207225	0.200593	0.122346	0.114266	0.105276
Zfp160	14.8854	17.3711	17.5809	11.4772	11.2929	11.5961
1700019A02Rik	0.0841963	0.258825	0.0440512	0.0748457	0.0250934	0.0751369
Dynlt3	24.2985	27.5981	31.4496	19.2824	19.174	19.0876
Rex2	0.245997	0.142823	0.336235	0.114445	0.183663	0.110805
Ggh	12.6391	16.1755	17.953	10.7865	10.6511	10.8167
Pipox	0.193428	0.196026	0.358096	0.141085	0.133034	0.150486
Ces2d-ps	2.10761	2.28575	3.56122	1.98473	1.55653	1.86964
4930570G19Rik	0.0820588	0	0.0515194	0	0	0
Cib3	0.4086	0.538312	0.555822	0.266363	0.316619	0.364635
4930544M13Rik	0.0747749	0	0.0586829	0	0	0
2010107E04Rik	146.296	165.776	176.693	114.599	112.161	111.433
F630028O10Rik	0.0755237	0.0165832	0.0493921	0.00559469	0	0
Fbxw28	0.066383	0	0.109577	0.00983512	0.00979327	0.00987338
Gm11937	0.133311	0	0	0	0	0
Gm12298	0.0321897	0	0.101049	0	0	0
Gm5127	0.75568	0.653592	0.641262	0.372088	0.504447	0.451837
Crmp1	5.13148	5.77239	4.43903	3.67352	3.29196	3.57178
Mixl1	0.0230127	0.0707424	0.108361	0.020457	0.0137171	0.013691
Rassf4	0.14503	0.138481	0.151759	0.0663037	0.0765682	0.0665616
Emb	53.6971	58.3386	68.1822	41.517	41.5559	41.7025
Nek11	0.090499	0.0176635	0.0420877	0	0.0119875	0
AA388235	3.81374	3.93181	4.00059	2.6566	2.7514	2.63928
Pms1	12.257	13.4663	14.0386	9.11441	9.30061	9.04672
Gabrd	0.417651	0.256777	0.437027	0.305265	0.116176	0.256757
Gm13539	0.132863	0	0	0	0	0
Olfr183	0.0441397	0.019384	0.0692811	0	0	0
Inpp4b	260.573	303.826	299.177	199.29	199.134	200.228
4930553C11Rik	1.35073	0.523597	1.01007	0.660823	0.587875	0.659433
Zfp874a	11.8517	14.7247	15.9728	9.96105	9.62871	9.82436
Ifit1	18.1818	47.2592	29.3438	21.965	21.7224	21.9533
Il20	0.0320334	0	0.100559	0	0	0
Fibcd1	0.387844	0.433105	0.289883	0.256116	0.181642	0.240663
Tmem237	2.77465	2.90418	3.7458	2.12145	2.18518	2.13826
Bet1	12.2492	13.6583	14.1247	9.1941	9.31147	9.17524
Psma4	125.939	145.266	154.278	97.1318	100.684	97.3595
Ndufb5	54.0575	62.1236	67.3554	42.137	42.3341	42.8039
Snx10	9.38063	11.4651	12.0345	7.37861	7.80588	7.54307
Meg3	0.389759	0.106036	0.427939	0.20277	0.238538	0.108309
4930430F08Rik	4.07118	3.94087	5.18993	2.95609	3.31471	2.80464
Smek2	67.0247	81.3574	86.0087	54.2605	54.3739	54.1241
Tspan8	0.0550163	0	0.0767581	0	0	0
Zfp58	11.2588	14.997	14.5314	9.32361	9.58276	9.34454
Snora7a	135.252	86.0729	117.546	79.7878	74.7721	80.8395
F8	0.434363	0.41826	0.524611	0.253223	0.343263	0.269121
Agtr1b	0.0859361	0	0.077187	0.00728587	0.00732815	0.00731421
1810022K09Rik	93.7717	95.498	104.852	69.4722	67.4495	67.4511
Stk17b	269.142	308.796	327.865	210.005	209.062	210.554
Eid2	2.41807	2.60567	3.38075	1.78224	2.24073	1.72873
Morn4	0.0871619	0.0510364	0.16721	0.0344364	0.0346363	0.0518556
Spi1	0.0396032	0.0521754	0.124321	0.02347	0.0118031	0.0235613
Zfp763	6.44885	7.16388	7.18848	4.85693	4.70844	4.80623
Atr	21.2473	25.8834	27.2136	17.3404	16.9771	17.2866
Gm14295	32.7233	37.7422	38.4837	25.3439	24.6924	25.6368
Samd9l	154.476	219.729	217.875	136.912	136.956	137.833
Zfp54	6.74731	7.29168	7.43422	5.07131	4.75648	5.01946
Mrpl14	11.3976	11.2498	12.3941	7.86793	8.80469	7.61812
Fam221b	0.0598878	0	0.109666	0.00887281	0.0178486	0
Atp6v1d	66.7554	72.0818	77.6202	49.6037	50.8614	50.0639
Klhl6	134.272	143.277	164.079	102.591	101.944	102.704
Sh2d1a	76.1349	73.1448	87.583	54.1671	56.5562	54.0327
Tcl1b1	0.0771799	0	0.0538403	0	0	0
Cyp1a1	0.0700678	0.0967069	0.192513	0.0764638	0.0357987	0.0466285
Sh2d4b	2.79027	2.98735	2.68529	1.97948	1.83315	1.98694
Grpr	0.045316	0.0557961	0.0864166	0.0106669	0.0265066	0.00233066
Muc4	0.161505	0.0616741	0.203287	0.0735183	0.066969	0.0654491
Sumo1	103.958	115.751	128.22	81.9286	79.3973	80.9578
Cacng3	0.0342799	0	0.125546	0.0101576	0	0.0101971
Msantd4	17.9666	20.4724	21.2885	13.8757	13.6586	13.9979
Gm6639	0.159973	0.22074	0.193208	0.0948046	0.0946522	0.119618
Olfr340	0.0421654	0	0.0882431	0	0	0
Fgf20	0.0894158	0	0.0561384	0.0105981	0	0
Prim1	9.48724	10.2521	10.8817	6.59179	7.95401	6.70963
BC089491	0.107737	0	0.022547	0	0	0
Lgmn	6.97214	6.58138	7.39876	4.97496	4.611	4.93566
Ndnf	0.512808	0.435553	0.483528	0.273848	0.298951	0.335261
Stk38l	4.70529	5.34391	4.88146	3.4287	3.39612	3.49986
Fbxo15	0.099857	0	0.0870746	0	0.0396811	0
Tpm2	0.074244	0.00931553	0.0554916	0	0.00632207	0
Gnpda2	23.6375	25.2678	29.6544	17.8975	18.9106	17.9162
Zfp869	37.1819	41.7357	43.4144	28.071	28.7247	28.4712
Rps4x	3006.76	3362.35	3692.35	2336.47	2341.06	2344.32
Zfp516	1.05126	1.18213	0.818383	0.672113	0.65138	0.716234
Zfp955a	17.3481	19.5887	19.6974	13.2948	13.0011	13.1576
Zcchc18	6.31368	5.53726	6.32525	4.18671	4.31601	4.0982
4930528H21Rik	0	0	0.218341	0.0309145	0	0.0310348
4933431E20Rik	1.04542	0.899655	0.960902	0.65816	0.632907	0.648483
Gspt2	0.0947208	0.101681	0.121141	0.04366	0.0501867	0.0375684
Gm5483	0.129427	0	0	0	0	0
Nudcd1	10.5582	11.6968	12.6283	8.10429	8.17046	8.01054
Gm5643	0.129312	0	0	0	0	0
S100a3	0.77852	0.325608	0.853429	0.483344	0.28727	0.507279
1700030L20Rik	1.06306	0.269491	0.445286	0.423387	0.298059	0.431092
4921536K21Rik	0.0896319	0.0427713	0.117422	0.0413475	0.0200125	0.0230336
Zfp946	2.40877	2.59418	2.61105	1.68739	1.80497	1.74132
Ms4a6b	643.46	739.042	788.874	506.144	504.581	507.929
Rfpl3s	0.0666554	0.0878155	0.313864	0.138257	0.0198656	0.0793111
Klra1	0.0791708	0	0.0497062	0	0	0
Mro	0.175408	0.040949	0.193126	0.0659695	0.0640544	0.0662977
Vmn1r123	0.128835	0	0	0	0	0
Shcbp1	0.811627	1.25432	1.45252	0.788063	0.757299	0.826119
4933402J10Rik	0.0248195	0	0.103884	0	0	0
1700007B14Rik	0.0651416	0.0110239	0.0525346	0	0	0
Cdh4	0.0979769	0.044713	0.124945	0.0262058	0.0416903	0.0293291
Slc25a4	67.7686	69.0221	75.2166	49.8196	48.405	50.089
Ccdc126	6.27635	6.95192	7.71051	4.80097	4.94661	4.81964
Il18r1	44.9573	54.2818	51.6686	35.1298	35.0836	35.3327
Crtam	0.422002	0.358689	0.470068	0.177484	0.389484	0.218668
Ttc33	21.857	26.1824	28.2231	17.7452	17.8032	17.7542
Ostm1	25.5008	29.6397	32.7684	20.7727	20.2562	20.4378
Lin9	7.51667	8.50589	8.33469	5.57193	5.65873	5.73691
Cep57l1	8.23842	8.00108	8.4438	5.92804	5.38424	5.88853
Gm6880	0.0841963	0	0.0440512	0	0	0
Sdcbp2	22.0771	22.8557	27.6592	16.9832	17.0372	16.749
1700028P15Rik	0	0	0.128098	0	0	0
1700026D11Rik	0.766624	0.541947	0.554684	0.421634	0.334175	0.460169
Lce1b	0	0	0.128068	0	0	0
Dsp	0.869578	0.727499	0.466478	0.44195	0.484177	0.430572
Tmem65	15.4499	15.8006	15.932	11.0242	10.8064	11.1532
Zfp131	30.2758	34.1009	36.8873	23.6235	23.5868	23.686
Gm6710	10.6782	11.924	11.6101	8.077	7.81659	7.99964
Srd5a2	0.0309081	0	0.097026	0	0	0
Gm35612	0.415678	1.15612	1.37738	0.533742	0.825908	0.618252
A730090N16Rik	0.190857	0.21792	0.139798	0.113107	0.0682583	0.113547
Eif3m	206.469	231.773	253.888	160.866	163.454	160.892
Rpl35a	1730.45	1902.19	2103.72	1344.53	1328.84	1349.19
Gabrr3	0.108773	0	0.0189698	0	0	0
Stfa2	0.0624008	0	0.0652957	0	0	0
Gm12887	0	0	0.127674	0	0	0
Dars2	5.5396	5.67534	6.54467	4.0994	4.19691	4.07434
Dlg5	0.0975171	0.109845	0.0919608	0.0400634	0.0362663	0.0442412
Fam163b	0.133671	0.0156538	0.0839233	0.0158434	0.0424944	0.0159051
Rps23	3103.01	3396.59	3907.86	2440.14	2422.91	2442.48
Kdelc1	4.7362	3.95034	5.06289	3.00874	3.46639	3.08802
Ccdc18	0.501752	0.534721	0.513231	0.357491	0.285637	0.355528
Snord96a	15.426	12.9465	13.272	8.93872	10.8296	9.38137
Celf5	0.209421	0.193916	0.198311	0.100805	0.141853	0.0904299
Olfr612	0.013578	0	0.113663	0	0	0
Cryz	1.22567	1.27898	1.33825	0.889949	0.832315	0.886842
6030440G07Rik	1.6557	0.729224	1.22559	0.832945	0.828854	0.784318
Cmc1	11.2954	12.6776	15.4463	9.14851	9.29948	9.14775
Vmn1r111	0.0455688	0	0.0965653	0.00203814	0.00649158	0.00204607
Dio1	0.0941577	0	0.0328419	0	0	0
Asnsd1	37.7401	44.3967	50.0612	30.8919	31.0294	30.8759
4930550C14Rik	0.362752	0.131191	0.156298	0.139103	0.101753	0.126949
Piwil1	0.0839919	0.0607209	0.0490214	0.0061873	0.0292411	0.0115866
Apoo-ps	0	0.126838	0	0	0	0
Cylc2	0.0203512	0	0.106477	0	0	0
Nampt	23.5497	31.4481	31.0673	20.4828	19.7425	20.1892
Rpl26	2184.54	2397.44	2709.14	1713.74	1709.58	1702.34
Gnpnat1	18.9009	19.162	23.0691	14.116	14.2	14.5716
Fancl	9.99592	11.8031	14.6059	8.56844	8.54461	8.39185
Trmt11	14.2312	14.4859	18.3824	11.1902	10.6481	11.19
Prop1	0.114557	0.0231833	0.163511	0.0309727	0.0427952	0.0489952
Lsm3	40.7018	44.8235	54.3209	33.1545	32.6392	32.4624
AI987944	20.66	22.975	25.1723	16.0619	16.0879	16.154
Gm10639	0	0	0.126408	0	0	0
Macrod2	0.129218	0.186451	0.231792	0.109397	0.0880256	0.0988404
Hopx	75.1727	72.5885	79.3983	53.9085	51.7782	54.0635
Tmsb15l	9.92131	11.0845	13.2933	7.66209	8.27496	8.1106
2410004P03Rik	1.69956	1.14137	1.65352	0.948136	1.12611	1.00003
Vmn1r51	0.0559465	0	0.0702503	0	0	0
Xlr4b	52.3051	54.7655	54.9982	38.1218	38.2356	37.6355
Zfp606	6.99266	8.03726	7.79653	5.43414	5.20059	5.34857
S100a6	22.3573	25.1502	34.3042	19.189	18.6877	19.6568
Pcdh7	0.0846916	0.024795	0.0640037	0.0111535	0.0112182	0.0111969
Skida1	0.204269	0.200813	0.157397	0.10501	0.100885	0.101982
Snord16a	19.144	18.5976	17.9075	13.7519	10.8924	14.4956
Fndc3b	0.468401	0.367561	0.394796	0.280637	0.242651	0.255826
Olfr243	0.111022	0	0.0145216	0	0	0
Fcrl6	0.124531	0.0589878	0.0961075	0.00547578	0.0715161	0.0317518
Gm21057	0.202265	0.310887	0.423296	0.0899009	0.391831	0.0902506
Crem	10.055	10.9858	12.8653	8.00169	7.9	7.92177
Snw1	81.4778	91.3465	96.5112	63.8177	62.5904	63.4607
Calcrl	15.1933	16.3323	17.8672	11.4865	11.6968	11.5649
Ebpl	7.10405	7.41151	8.80332	5.43015	5.59037	5.33787
Mpc1	45.1882	52.5466	55.9235	35.6231	36.01	36.6592
Magohb	7.16711	7.65109	8.65381	5.42391	5.6345	5.40954
Nkain1	0.102666	0.0450861	0.150401	0.0486745	0.0244785	0.0488638
Ndufaf2	8.57021	8.66242	8.45865	6.06831	6.08092	5.88885
Hacl1	5.62634	6.33157	7.42693	4.34066	4.90516	4.34416
Cyp2c70	0.0926701	0	0.0323231	0	0	0
4930459C07Rik	0.0437374	0.0768295	0.0228832	0	0.0130352	0
Btnl6	0.778342	0.486563	0.533136	0.418878	0.372166	0.390458
AI662270	66.9129	74.9268	81.2136	52.4165	52.0881	52.9215
Nln	4.63668	5.06598	4.82255	3.51755	3.24244	3.41076
Igf1	0.0656668	0.0158232	0.0803539	0.0113438	0.00593303	0.00913717
Olfr521	0.0818889	0	0.0425583	0	0	0
Uba6	17.5353	19.7416	19.2612	13.5172	12.8236	13.5352
Clpsl2	0	0	0.124415	0	0	0
Gm13546	9.66323	8.45747	12.9144	7.19335	7.15446	7.50374
Krtap10-10	0.0396439	0	0.0846592	0	0	0
Gsta1	0.118029	0	0.0320791	0	0.0182736	0
Hmga2	0.619602	0.812019	0.904482	0.520364	0.539914	0.503734
Zfp456	11.7333	13.9433	14.1122	9.39171	9.27943	9.37666
Ldlrad1	0.222982	0.0489615	0.320825	0.0991093	0.149527	0.0829124
Myo1b	0.0757404	0.0332615	0.051402	0.0128246	0	0.0128744
4930579J19Rik	0.123923	0	0	0	0	0
Ppwd1	10.4158	11.8383	14.2983	8.41424	8.86954	8.49905
Tmem182	0.048167	0	0.0756024	0	0	0
Zfp719	8.31806	9.98729	9.89753	6.6376	6.62866	6.61247
4930598F16Rik	0.728392	0.700678	0.646041	0.472777	0.434171	0.474616
Olfr1423	0.0848731	0.0745443	0.059207	0.0335322	0	0.0336626
Sox10	0.0972928	0.0512716	0.122168	0.0345951	0.0289966	0.040518
Pwp1	22.1993	24.8645	26.0458	17.426	16.759	17.4938
Olfr187	0.0728488	0	0.0508189	0	0	0
Olfr860	0.0556493	0	0.0679739	0	0	0
Zfp708	7.25872	8.18925	8.95029	5.74258	5.89268	5.55612
Lims1	55.0988	63.4489	62.5529	42.8144	42.5618	42.8004
Rnf7	41.2025	42.4754	49.3462	31.4237	30.7061	32.0037
Cyp4a32	0.065782	0	0.0577222	0	0	0
Cnrip1	2.27113	1.99474	2.04202	1.44563	1.64425	1.29112
Akr1b8	0.0823848	0.0545803	0.108023	0.0365877	0.0126689	0.0368505
Gml	0	0	0.123442	0	0	0
1700020M21Rik	0.123344	0	0	0	0	0
Txndc16	7.18289	8.44912	9.09186	5.79031	5.72278	5.92086
Slc2a10	0.100617	0.0558316	0.0591169	0.0286526	0.0132411	0.0235051
Azgp1	0.060218	0	0.0630116	0	0	0
Nphp1	0.240943	0.231775	0.372178	0.176787	0.184652	0.150171
Daam1	2.7066	3.57354	2.49653	2.03626	1.99512	2.1043
Fpgt	17.5329	21.2305	22.4031	14.7237	13.8772	14.683
Spert	0.0169067	0	0.106146	0	0	0
Gnb4	4.38486	4.83739	5.51197	3.45562	3.46584	3.44052
Chchd1	45.9662	47.0407	54.8386	34.2943	35.7118	34.756
Actc1	0.0189896	0.100072	0.0198706	0	0	0.0112976
Gm1821	0.381477	1.15785	0.820352	0.828421	0.240591	0.517571
Tbx18	0.106056	0.0267061	0.138661	0.0286845	0.0474125	0.0292324
Zfp111	0.29115	0.249414	0.314994	0.167281	0.184065	0.16835
2900092D14Rik	0.17374	0	0.143982	0.0410753	0.0600322	0.0371447
Zfp930	13.6412	15.8248	18.3241	11.4088	11.0677	11.3458
Hs3st2	0.0813959	0	0.0608372	0.00689108	0	0.00691789
Mup7	0	0	0.122726	0	0	0
Zfml	75.2749	89.6866	89.1684	60.2148	59.8905	60.1589
C030023E24Rik	0.0743317	0.00891356	0.0790238	0.00395539	0.0111721	0.0130002
Trappc2	8.636	10.4085	9.53705	6.67383	6.95134	6.57581
Gm5800	0.0599218	0	0.0627016	0	0	0
Rpl37a	2076.06	2236.62	2509.97	1620.45	1606.87	1615.9
Olfr99	4.56545	4.66999	4.04914	3.09703	3.18167	3.06631
Tdrd5	0.0666554	0	0.0697477	0	0	0.00991389
Zfp157	7.0099	8.3928	8.91737	5.72842	5.67253	5.78381
1110058D11Rik	0.0395735	0	0.0828188	0	0	0
Otud6b	11.3675	12.3584	12.8815	8.69224	8.60004	8.6209
Evi2a	10.8411	11.809	14.3536	8.71281	8.92806	8.55782
Eea1	17.9154	19.0208	20.5607	13.5459	13.7003	13.5106
Cd84	84.4996	91.7157	104.924	66.7652	65.6283	67.2803
Bivm	4.13193	4.39515	4.54018	3.00064	3.14142	3.05629
Ntrk2	0.180516	0.0651108	0.152911	0.0533363	0.0778587	0.0652138
Ccdc132	13.1121	14.8528	15.5187	10.1158	10.5949	10.109
Vdac3	44.4254	52.3899	56.153	36.0548	36.4306	36.1619
F10	0.737917	0.368363	0.627884	0.330256	0.463588	0.352152
Ggct	8.27525	9.83843	10.099	6.57168	6.76935	6.62964
Zfp947	4.38172	5.15517	5.83408	3.67508	3.35085	3.81765
Eif3e	300.603	335.454	377.077	239.764	237.764	242.867
Efhc2	0.143789	0.11727	0.204195	0.0791268	0.09183	0.0733242
Myo5a	4.11322	4.36403	3.73689	2.85719	2.84404	2.89983
Tbc1d19	1.18819	1.50933	1.83928	1.04751	1.05944	1.03405
Gm14851	0	0	0.121674	0	0	0
4930592A05Rik	0	0	0.121627	0	0	0
Use1	139.408	138.138	154.295	102.471	102.118	102.599
Aasdhppt	15.2976	16.1334	18.1027	11.6933	11.8833	11.5832
Gm10509	9.99721	11.9151	11.8826	7.79262	8.05546	8.1141
Hltf	37.156	41.4636	45.1193	29.472	29.0454	29.4567
Hsd3b3	0.0791423	0	0.0424007	0	0	0
Fhl5	0.023256	0.0204258	0.0973395	0	0.0138621	0
Fam159a	0.029361	0	0.0921693	0	0	0
Cct2	196.155	214.769	220.701	149.774	150.607	149.089
Skint11	0.0715649	0	0.0499233	0	0	0
Cd300lb	0.0366605	0.0482985	0.0671321	0.00543151	0.00546303	0.0109053
Lcn11	0.121452	0	0	0	0	0
Trpc6	0.608852	0.678084	0.947108	0.495249	0.510379	0.498438
Cbr4	7.45704	7.23568	7.50572	5.42937	5.05167	5.23923
Cldn24	0.0796245	0	0.0416592	0	0	0
D030056L22Rik	16.0218	17.2281	18.7634	12.5737	11.8595	12.5263
Coq3	4.58614	4.42727	5.30627	3.4068	3.31795	3.38953
Mrps22	15.1925	18.132	16.1454	11.8783	11.3266	11.9501
Kitl	0.0242161	0.0765687	0.0405432	0.00574046	0.00577378	0.0028814
Crybb3	0.064458	0.0566137	0	0	0	0
Trim23	9.45355	10.8784	12.0809	7.72204	7.67082	7.61562
Mfsd7b	12.2792	13.6094	13.5318	9.28733	9.39674	9.31796
LOC171588	0.0678113	0	0.0532179	0	0	0
Gh	0.0292309	0	0.091761	0	0	0
Fam60a	26.763	27.2109	27.3995	19.1813	19.5896	19.131
Olfr1107	0.0714036	0	0.0495617	0	0	0
Crybb1	0.120942	0	0	0	0	0
Olfr121	0.120918	0	0	0	0	0
Olfr868	0.0233176	0	0.0975974	0	0	0
4930455H04Rik	0.0590504	0	0.0617899	0	0	0
Slirp	41.1696	42.4433	45.2788	31.6145	29.3528	30.8556
Aldh1l1	0.630494	1.01773	0.838053	0.545325	0.573883	0.567722
Rbfox2	0.111028	0.0531422	0.0791406	0.0335042	0.0180327	0.0359068
Zfp954	15.2454	17.1905	18.1937	11.8174	12.3254	11.8786
2310003N18Rik	0	0	0.120612	0	0	0
Tnni2	0.079147	0	0.0414094	0	0	0
Tcte1	0.0547832	0	0.0657706	0	0	0
Kbtbd8	8.01925	9.03481	9.51615	6.23031	6.28317	6.36123
Sgpp1	41.6262	47.2384	49.1497	33.0643	32.5029	32.8575
Atp4b	0.0994557	0	0.0208139	0	0	0
Zfp600	0.121273	0.107296	0.126301	0.0571121	0.0583523	0.0520052
Adh6-ps1	0.0506332	0.00806303	0.0928922	0.00572091	0.0104364	0.00624991
Naa20	28.1963	32.0111	34.3984	22.6877	22.493	22.2809
Amd1	44.7185	51.6275	51.5831	35.4404	34.6226	35.4886
Gm10785	12.0037	6.57244	11.5342	7.04254	7.31587	7.05799
Cdc7	11.6274	11.6308	10.1261	7.91323	7.86091	7.98132
Ndufaf4	9.12783	9.35119	9.56657	6.73168	6.35891	6.85299
Prph2	0.0300861	0.0792742	0.0524697	0.0059433	0.0239112	0
Fcgr1	0.0713668	0.0358181	0.0213365	0	0.00607707	0
Zfp944	12.4459	14.1786	14.1659	9.63485	9.80944	9.60537
Vmn2r42	0.127497	0	0.105891	0.0177023	0.0456416	0.0176411
Mut	8.72748	9.98093	10.3578	6.64615	7.37807	6.65192
Ankrd29	0.389123	0.583854	0.733001	0.384343	0.35787	0.390661
Gm3458	0.0586242	0	0.0613439	0	0	0
Zik1	1.79371	2.06669	2.31518	1.42916	1.47657	1.42052
Sprr2a1	0.120257	0.0162747	0.0636967	0.0209041	0.0192954	0.0171779
Ivl	0.0548764	0.0219301	0.0430666	0	0	0
Ogfrl1	2.18254	2.0854	1.93683	1.44957	1.51489	1.3834
Snora70	30.6925	26.0587	28.6906	19.4007	20.4902	21.0818
Rpl5	1408.11	1584.16	1769.95	1135.66	1131.89	1135.66
Dnaja4	8.96833	9.22703	8.34577	6.16981	6.57086	6.14557
Hist4h4	87.3031	70.6742	82.9861	57.1199	57.917	57.1275
Boll	4.32253	5.16682	6.07535	3.45596	3.96403	3.62157
Wdr60	1.53059	1.3381	1.27534	0.97426	0.979914	0.923246
4933438K21Rik	1.34363	0.955404	1.682	1.01646	0.719765	1.0256
Zfp248	1.4	1.43161	1.68984	1.06126	1.02324	1.06471
Alg6	2.39721	2.26115	2.83403	1.8283	1.64459	1.80304
Rps6	1786.64	1951	2228.35	1422.55	1422.38	1424.26
Ift88	2.07107	1.84149	2.41687	1.44457	1.49867	1.50089
Efnb2	0.103895	0.112723	0.19185	0.0833025	0.0510001	0.0727187
Dkk2	0.160012	0.120578	0.254805	0.0862146	0.133724	0.0779882
Csf2rb2	0.645038	0.505513	0.694647	0.441826	0.374408	0.419196
Tubal3	0.163852	0.199159	0.187201	0.120202	0.0644561	0.123888
3110099E03Rik	0.185987	0.0901378	0.2364	0.0758473	0.0983644	0.107383
Ddx60	18.5033	25.9946	26.735	17.0906	16.4937	17.3243
Pirt	0.250994	0.0511509	0.233314	0.0995448	0.107274	0.0912831
Tas2r137	0.210743	0.115685	0.0551299	0.0624461	0.0628085	0.062689
A530032D15Rik	1.44306	1.66222	1.56979	1.03278	1.23911	0.99013
Col25a1	0.0703568	0.0205982	0.0572606	0.00694925	0.00465972	0.00930171
Nup35	13.2375	14.9197	15.5093	10.4229	10.3324	10.4238
Calca	0.080311	0.0940499	0.0560245	0.0158649	0.0159569	0.047939
Mrpl33	65.9376	71.0338	81.4336	52.1776	52.7269	51.4072
Kcnk2	0.0546372	0.0204675	0.080568	0.0079316	0.0103709	0.00805613
Hspb11	10.7188	13.686	18.084	10.0461	9.93549	10.3661
Olfr1377	0.0285666	0	0.0902734	0	0	0
Olfr346	0	0	0.118796	0	0	0
B020004C17Rik	0.71196	0.769569	0.923101	0.49296	0.654278	0.490795
4930447K03Rik	1.29678	0.956283	1.30694	0.836653	0.775101	0.854197
Defb48	0.118632	0	0	0	0	0
Zfp788	9.06249	9.60325	11.5313	7.19167	7.2151	7.15049
Cgref1	0	0.240419	0.0421462	0.0347617	0.0595544	0.0232646
Xdh	9.65998	10.5733	8.13092	6.91963	6.61595	6.71216
Prss30	0.342837	0.110314	0.344452	0.160261	0.149517	0.177133
Krcc1	48.882	50.183	58.5418	37.2869	38.0594	37.5744
Xrcc5	24.5886	27.9888	29.2207	19.4389	19.6367	19.4901
Odf2l	2.96422	3.02915	3.60886	2.18416	2.32267	2.29324
Calm2	163.075	184.066	202.899	132.593	129.527	132.242
C87414	0.0951856	0	0.0588839	0.00591297	0.00785041	0.0118719
Rb1cc1	27.5821	29.5201	29.7678	20.7767	20.8256	20.6181
Ccbl2	1.48511	1.55914	1.49331	1.11301	1.02223	1.03444
Copb1	54.6065	61.5633	69.7376	44.3651	44.0825	44.8077
Fndc7	0.115075	0.0905244	0.148076	0.0550031	0.0587013	0.0551864
Filip1	0.188226	0.165319	0.144436	0.0743654	0.115935	0.0821201
Brca1	1.92964	2.22365	2.80023	1.59769	1.72766	1.57792
Rarb	2.9484	3.09743	2.90571	2.03985	2.16177	2.13544
Krtap31-2	0	0	0.118161	0	0	0
Rnf19a	32.606	34.2503	38.2382	25.0052	25.3793	24.9304
Syt5	0.0598538	0.144567	0.0626306	0.0266033	0.0624347	0.0178045
Usp53	10.5083	13.1514	9.94983	8.15586	7.81123	8.06294
Foxa3	0.0771542	0.00852745	0.102001	0.015497	0.0189821	0.0154803
Dpp4	39.2109	48.0379	51.5618	33.2789	32.7513	33.5102
Mir6966	0.366605	0.96597	0	0.217261	0.218521	0.436211
Gm4944	17.651	20.614	19.7743	13.8991	13.7593	13.9258
Klhl9	54.1104	63.8915	65.6819	44.4624	42.9586	44.3809
Thoc1	22.296	25.1647	27.5141	17.6589	18.372	17.7172
Efcab10	0.0757967	0.0334535	0.0398558	0	0.0224765	0
Neo1	0.0903091	0.0920098	0.0491393	0.0235487	0.030145	0.0279385
Ggact	19.179	20.6477	21.7579	14.5488	14.54	15.0501
Olfr688	0.0819737	0	0.0357403	0	0	0
Hpcal4	0.0680882	0.019934	0.0296862	0	0	0
Zpbp	1.4073	1.78472	1.73838	1.16761	1.16211	1.12707
Murc	0.0640047	0	0.0535792	0	0	0
Atp6ap2	26.5288	29.672	33.2929	21.6075	21.0972	21.5065
Cdkl2	0.710762	0.46963	0.566331	0.444404	0.338153	0.387942
Olfr339	0.0283823	0	0.089097	0	0	0
Gm13034	0.222208	0.1197	0.248927	0.134698	0.090978	0.11459
Olfr1489	0	0	0.117283	0	0	0
Retn	0.0907063	0.0265559	0	0	0	0
Matr3	114.916	130.331	145.451	93.931	92.7702	94.1191
Slc16a14	0.0446814	0	0.0818199	0	0.00665829	0
Dab2	0.0487259	0.0305687	0.0437027	0	0.00414914	0
A230073K19Rik	1.911	2.00392	1.90926	1.34305	1.4006	1.36019
Kif18a	2.04382	2.66093	2.93864	1.77198	1.92042	1.72033
Frmd7	5.26542	5.89685	6.60338	4.26589	4.17462	4.25211
Dcaf13	42.8456	48.5701	59.2586	36.013	36.2856	35.9906
Polr1c	39.6843	38.0881	44.5316	28.8879	29.4555	29.5538
Zfp51	22.4723	26.1421	27.4408	17.9822	18.6589	17.9893
Brms1l	7.52983	7.69765	8.50345	5.72412	5.61649	5.6484
Olfr332	0.0824345	0	0.0345035	0	0	0
Prrx1	0.129488	0.0427976	0.0938632	0.0422596	0.0197007	0.0454543
Rpl37	732.58	798.329	897.981	583.467	582.347	582.066
Spn-ps	0	0	0.170705	0.0193359	0	0.0194111
Olfr159	0.116855	0	0	0	0	0
Sumo2	265.634	298.27	326.318	215.8	209.795	215.027
Asph	0.823687	1.1274	1.06793	0.708515	0.677864	0.702597
Alpk1	0.578004	0.715564	0.576018	0.423284	0.406874	0.431481
Vps41	31.5317	38.1016	38.7153	25.6703	26.7081	25.5281
Taf1d	66.1984	71.2074	79.0174	51.6116	51.6307	52.4618
Apip	8.82708	10.7386	11.7176	7.44893	7.42405	7.56288
Olfr449	0.0282004	0	0.0885259	0	0	0
Memo1	26.7657	27.9774	30.1457	19.9453	20.9227	20.1694
Immp1l	26.3953	28.3989	30.9186	20.4257	20.8408	20.3736
Scnn1a	0.0901128	0.0131911	0.0628622	0.0133509	0.00895223	0.0134028
Olfr1504	0	0	0.11654	0	0	0
Asah1	13.5554	14.0544	16.7977	10.7116	10.2056	10.9832
Zfp874b	15.2021	18.7004	19.7701	12.9044	12.5223	13.1473
Olfr282	0.0568869	0	0.059526	0	0	0
Ctcfl	1.08823	0.99918	1.09141	0.803679	0.611344	0.791526
Olfr535	0.0281103	0	0.0882431	0	0	0
Olfr577	0.0281103	0	0.0882431	0	0	0
Ripply1	0	0	0.116338	0	0	0
Syt14	0.132178	0.152676	0.220373	0.0911305	0.093652	0.0954626
Ccl20	2.47845	2.66798	1.39494	1.76422	1.15065	1.71578
Cdr1	0.0684709	0	0.0477649	0	0	0
Vmn1r213	0.0388506	0.0802885	0.0858494	0.0277642	0.0273804	0.00883753
Spcs3	41.8816	45.2813	48.2064	33.0189	31.4575	33.0153
Cacng2	0.0731432	0	0.0430517	0	0	0
Olfr815	0	0	0.116173	0	0	0
Tmem45a2	0.142865	0.0287996	0.08087	0.0311121	0.0265218	0.0407055
4930407I10Rik	0.0451882	0	0.0709268	0	0	0
Uqcrh	315.762	334.025	387.753	249.798	251.272	246.885
Polr2b	47.8193	54.2393	58.3635	38.1897	39.3305	38.0661
Ang6	0	0	0.116051	0	0	0
Ces3a	0.0266824	0	0.0893447	0	0	0
Tyms-ps	0.423661	0.296202	0.263488	0.175589	0.221695	0.228268
Vmn1r72	0.085979	0	0.0299892	0	0	0
Tomt	0.877252	1.01979	1.44404	0.750945	0.821188	0.753866
Sycp3	0.385207	0.359013	0.077346	0.154769	0.1704	0.18381
Olfr1215	0.027991	0	0.0878687	0	0	0
Olfr75-ps1	0.0450628	0	0.07073	0	0	0
Zfand1	11.5808	12.0209	13.6956	9.0097	9.09754	8.72037
Nrl	0.0679723	0.0449164	0.0361237	0.00501941	0.0134841	0.00548542
1700016C15Rik	0.140964	0.0619046	0	0.0208849	0.0210061	0.0209661
Rpp40	3.8041	2.54203	4.06397	2.57465	2.41541	2.43877
Gm2012	0.115702	0	0	0	0	0
Rpp30	9.99967	10.6619	12.3725	7.87824	8.00101	7.88195
Lmln	0.372401	0.400393	0.402846	0.245429	0.263808	0.255933
Hadhb	78.8612	85.0041	90.6547	60.9034	62.021	60.7232
Mettl10	18.5505	18.9492	20.3696	13.5932	14.2134	13.8856
Zfp62	49.0619	59.0989	57.6447	39.872	39.5168	40.2378
Fnip1	17.1817	20.4128	19.4453	13.7668	13.4759	13.8578
Olfr1193	0	0	0.115444	0	0	0
Stag2	95.3937	115.427	118.36	78.7992	79.6229	79.2444
Rnf180	0.0418423	0.0181301	0.0729725	0	0.0127198	0
Prol1	0.067913	0	0.0473758	0	0	0
Olfr657	0.0274954	0.0241493	0.0863127	0	0.0163891	0
Pld4	0.0533782	0.082044	0.111709	0.0237251	0.0477256	0.0238174
Olfr1079	0.0278434	0	0.0874053	0	0	0
Ttc39d	0.0520879	0	0.0953826	0	0.0232859	0
Fbxl5	48.0822	54.4409	55.7065	38.2819	37.6586	38.299
Vmn2r31	0	0.0107579	0.104456	0	0	0
Acadsb	14.7903	16.0787	15.881	11.2785	11.0764	11.3411
Rslcan18	1.05945	1.58301	1.48552	0.933843	1.06709	0.898756
Nrn1	13.3931	13.7499	18.256	10.6563	11.5722	10.4943
Vmn1r158	0.0831288	0	0.0319843	0	0	0
Raph1	1.25104	1.41589	1.1208	0.875287	0.86751	0.911436
Psmd14	67.9518	73.8617	78.9297	53.3351	52.9796	53.14
Itgb6	0.118973	0.049374	0.163518	0.0395835	0.0928542	0.0242318
Ppy	0	0	0.115084	0	0	0
Tas2r144	0	0	0.115084	0	0	0
Bmi1	28.1892	31.1878	35.0137	23.1322	22.1338	22.8737
Kif1b	18.9721	21.8368	19.0866	14.3849	14.4377	14.3862
8030455M16Rik	0.42666	0.163465	0.408483	0.183828	0.23391	0.22093
Zfp59	7.15579	8.99785	8.75835	5.8091	6.22995	5.88793
Gpr83	54.2281	49.1755	54.8916	38.0591	37.9018	38.4095
9130409J20Rik	0.02215	0	0.0927105	0	0	0
Nop58	67.2561	66.8156	73.9019	50.6305	48.9531	50.734
Gm561	14.3191	11.1118	15.3445	9.98751	9.76713	9.65002
Iigp1	93.0229	135.18	104.303	81.1778	78.1875	81.0246
Pald1	0.0555826	0.0162728	0.0581611	0.00731996	0	0.00367422
Atf7ip2	0.043617	0.0255393	0.0456404	0	0	0
Zfp68	23.0957	27.4887	27.9871	18.9917	18.7114	19.0418
Zfp608	2.37167	1.49068	1.39637	1.28131	1.16073	1.27856
[truncated: 22,371 more rows]

## Sheet: b
Table S1b. GSEA analysis on all canonical pathways comparing TCF deficient and sufficient Tregs related to Figure 1b. Shown are pathways with FDR>25%.
NAME	SIZE	ES	NES	NOM p-val	FDR q-val
WNT SIGNALING PATHWAY	149	0.767416	1.76521	0	0.00562546
BASAL CELL CARCINOMA	62	0.822304	1.75698	0	0.00393748
MAPK SIGNALING PATHWAY	285	0.709238	1.68606	0	0.0208948
HIPPO SIGNALING PATHWAY	153	0.726653	1.68575	0	0.0156711
COLORECTAL CANCER	86	0.767746	1.67939	0	0.014863
BREAST CANCER	143	0.724324	1.67433	0	0.0150484
ADHERENS JUNCTION	66	0.792948	1.67209	0	0.0148597
HEPATOCELLULAR CARCINOMA	163	0.727289	1.66643	0	0.0146118
TH1 AND TH2 CELL DIFFERENTIATION	85	0.760082	1.66598	0	0.0129882
MEASLES	124	0.719305	1.65051	0	0.0166157
ENDOMETRIAL CANCER	58	0.783507	1.64795	0.00134953	0.0159604
PROSTATE CANCER	96	0.74771	1.64163	0.00127551	0.0165578
CUSHING SYNDROME	152	0.716128	1.63894	0	0.0163552
ACUTE MYELOID LEUKEMIA	64	0.770115	1.63546	0.00269542	0.0159277
GASTRIC CANCER	145	0.719259	1.62733	0	0.0175491
INFLAMMATORY BOWEL DISEASE (IBD)	58	0.773569	1.6176	0.00417246	0.0207579
HUMAN T-CELL LEUKEMIA VIRUS 1 INFECTION	206	0.687102	1.61676	0	0.0198103
TH17 CELL DIFFERENTIATION	100	0.73116	1.59811	0.00125945	0.028006
EPSTEIN-BARR VIRUS INFECTION	178	0.683593	1.58778	0.00114943	0.0319167
MELANOGENESIS	97	0.713439	1.57726	0.00622665	0.0344216
HEPATITIS B	149	0.691762	1.5745	0	0.0346632
PARATHYROID HORMONE SYNTHESIS, SECRETION AND ACTION	104	0.705016	1.57389	0.00126904	0.0335614
NEUROTROPHIN SIGNALING PATHWAY	115	0.696447	1.56772	0	0.0353549
MICRORNAS IN CANCER	188	0.666353	1.56525	0	0.0354856
GLYCOSAMINOGLYCAN BIOSYNTHESIS	52	0.751437	1.5649	0.0137741	0.034289
TIGHT JUNCTION	156	0.677497	1.56009	0.00119332	0.0352545
CELLULAR SENESCENCE	149	0.672519	1.55236	0.00484848	0.0383868
THYROID HORMONE SIGNALING PATHWAY	115	0.679133	1.54231	0.00502513	0.0435854
CHRONIC MYELOID LEUKEMIA	75	0.709111	1.54051	0.00915033	0.0432511
HEPATITIS C	141	0.677045	1.53921	0.00362757	0.0424719
GNRH SIGNALING PATHWAY	88	0.697471	1.53719	0.00750939	0.0422779
JAK-STAT SIGNALING PATHWAY	137	0.668532	1.51533	0.00714286	0.0569621
LYSINE DEGRADATION	52	0.727921	1.50922	0.0250696	0.059923
LONGEVITY REGULATING PATHWAY	98	0.686584	1.50557	0.0188917	0.0617518
ARRHYTHMOGENIC RIGHT VENTRICULAR CARDIOMYOPATHY (ARVC)	70	0.694121	1.50213	0.0270636	0.0634153
HUMAN CYTOMEGALOVIRUS INFECTION	201	0.63814	1.50182	0.00115075	0.0618497
INSULIN RESISTANCE	105	0.670335	1.50004	0.0226415	0.0615535
OSTEOCLAST DIFFERENTIATION	115	0.667672	1.48689	0.00718563	0.0712707
TOXOPLASMOSIS	101	0.658883	1.48253	0.0174782	0.0734593
KAPOSI SARCOMA-ASSOCIATED HERPESVIRUS INFECTION	168	0.636158	1.47954	0.00471143	0.0739203
SHIGELLOSIS	61	0.703593	1.47628	0.0223464	0.0750306
B CELL RECEPTOR SIGNALING PATHWAY	70	0.685131	1.47504	0.0235294	0.0743849
MITOPHAGY	63	0.694423	1.46952	0.0311231	0.077189
FLUID SHEAR STRESS AND ATHEROSCLEROSIS	132	0.647164	1.46825	0.00968523	0.0768113
ERBB SIGNALING PATHWAY	82	0.656976	1.45803	0.0417755	0.0829232
GLUCAGON SIGNALING PATHWAY	94	0.664136	1.4548	0.0156454	0.0844474
TRANSCRIPTIONAL MISREGULATION IN CANCER	170	0.629396	1.45233	0.0105882	0.084651
PI3K-AKT SIGNALING PATHWAY	327	0.606324	1.44965	0	0.0850751
ALDOSTERONE SYNTHESIS AND SECRETION	95	0.649181	1.44841	0.0244845	0.0845175
VIRAL CARCINOGENESIS	192	0.61983	1.44265	0.00580046	0.0883951
FOXO SIGNALING PATHWAY	127	0.636267	1.44076	0.0161692	0.0882817
APELIN SIGNALING PATHWAY	130	0.626316	1.4402	0.025393	0.0872787
CGMP-PKG SIGNALING PATHWAY	157	0.622959	1.43986	0.0177305	0.0859572
IL-17 SIGNALING PATHWAY	86	0.654191	1.43591	0.0307298	0.0879902
PROTEOGLYCANS IN CANCER	194	0.607115	1.43513	0.013905	0.0871035
ENDOCYTOSIS	224	0.606315	1.43318	0.011236	0.0871419
AGE-RAGE SIGNALING PATHWAY IN DIABETIC COMPLICATIONS	97	0.645142	1.43025	0.0231362	0.0881784
PANCREATIC CANCER	75	0.658912	1.42868	0.0312907	0.0880728
HUMAN IMMUNODEFICIENCY VIRUS 1 INFECTION	183	0.612013	1.42437	0.0139373	0.0908911
INSULIN SIGNALING PATHWAY	131	0.62497	1.41926	0.0230863	0.0937966
REGULATION OF ACTIN CYTOSKELETON	204	0.605053	1.41787	0.0195178	0.093534
CELL CYCLE	121	0.628217	1.41674	0.0316302	0.0928656
TNF SIGNALING PATHWAY	106	0.630904	1.41358	0.0337079	0.0941979
PROLACTIN SIGNALING PATHWAY	65	0.666496	1.41163	0.0414365	0.0945698
AMYOTROPHIC LATERAL SCLEROSIS (ALS)	51	0.683187	1.41082	0.0497159	0.0940756
CORTISOL SYNTHESIS AND SECRETION	63	0.6531	1.40653	0.0537931	0.0966519
ESTROGEN SIGNALING PATHWAY	125	0.62199	1.40435	0.040293	0.0972334
LEUKOCYTE TRANSENDOTHELIAL MIGRATION	105	0.626997	1.40105	0.0327869	0.099051
CENTRAL CARBON METABOLISM IN CANCER	63	0.659114	1.39433	0.0596591	0.103953
SMALL CELL LUNG CANCER	90	0.627066	1.3855	0.0444444	0.112004
AMPK SIGNALING PATHWAY	116	0.614646	1.38083	0.0386534	0.115661
TGF-BETA SIGNALING PATHWAY	86	0.626931	1.37926	0.0443286	0.11623
INFLUENZA A	146	0.59796	1.37699	0.0427553	0.117132
PROTEIN PROCESSING IN ENDOPLASMIC RETICULUM	155	0.591792	1.36684	0.0335329	0.1269
APOPTOSIS	134	0.598874	1.36215	0.0442804	0.130381
HUMAN PAPILLOMAVIRUS INFECTION	309	0.564177	1.36004	0.0153341	0.130899
BILE SECRETION	64	0.63866	1.3566	0.079235	0.133463
NON-SMALL CELL LUNG CANCER	66	0.626417	1.35285	0.0842246	0.136168
LYSOSOME	119	0.601389	1.352	0.0545229	0.135362
OXYTOCIN SIGNALING PATHWAY	146	0.582199	1.34883	0.0508876	0.137168
RENIN SECRETION	62	0.635463	1.33476	0.102635	0.152243
NF-KAPPA B SIGNALING PATHWAY	88	0.607629	1.33256	0.0722581	0.153381
INSULIN SECRETION	79	0.608173	1.32449	0.0936675	0.16167
SALMONELLA INFECTION	77	0.61218	1.32445	0.0988142	0.159814
C-TYPE LECTIN RECEPTOR SIGNALING PATHWAY	101	0.589934	1.31605	0.0934699	0.169538
ANTIGEN PROCESSING AND PRESENTATION	55	0.624166	1.31127	0.110955	0.174091
NATURAL KILLER CELL MEDIATED CYTOTOXICITY	96	0.588235	1.31003	0.084596	0.173814
REGULATION OF LIPOLYSIS IN ADIPOCYTES	52	0.631373	1.3035	0.119114	0.180867
T CELL RECEPTOR SIGNALING PATHWAY	99	0.590556	1.30296	0.0990991	0.179491
ARACHIDONIC ACID METABOLISM	57	0.621749	1.30257	0.119342	0.178214
CAMP SIGNALING PATHWAY	201	0.552693	1.29978	0.0719257	0.179947
FOCAL ADHESION	189	0.551532	1.29535	0.0618436	0.183861
CHAGAS DISEASE (AMERICAN TRYPANOSOMIASIS)	96	0.577953	1.28818	0.104031	0.192043
RELAXIN SIGNALING PATHWAY	125	0.566522	1.27994	0.101591	0.201782
TOLL-LIKE RECEPTOR SIGNALING PATHWAY	87	0.571776	1.26576	0.126289	0.219962
RENAL CELL CARCINOMA	65	0.595531	1.26248	0.1417	0.222897
GLIOMA	72	0.584459	1.25977	0.155792	0.225064
OOCYTE MEIOSIS	106	0.562933	1.25966	0.117573	0.222959
PROGESTERONE-MEDIATED OOCYTE MATURATION	84	0.577374	1.25944	0.137453	0.22114
SPHINGOLIPID SIGNALING PATHWAY	117	0.553496	1.25258	0.116851	0.228792
