# Supplementary material for: TCF1 controls Treg functions that regulate inflammation, CD8 T-cell cytotoxicity, and severity of colon cancer
Source: Research Square preprint supplement (doi:10.21203/rs.3.rs-136816/v1), 2021-01-13
Supplement: Supplementary file 2 [file 5a49a984a3af3181df59bfa2.xlsx]

## Sheet: a
Table S2a. List of 200 genes expressed more highly in the indicated cluster compared to all other clusters used for metascape analysis in Figure 3d.
Klf2–	Klf2++	Maf	Mif	Ncoa3	Ikzf2	Klf2+	Vps8	Ifn
IZUMO1R	KLF2	MAF	NFKBID	ACTB	IKZF2	KLF2	VPS8	IFIT1
RGS10	IGFBP4	LAG3	SRM	ABHD2	KLRG1	SELL	MS4A4A	IFIT3
CAPN3	SELL	ICOS	EGR2	RPGRIP1	NAV2	S1PR1	WDR89	RSAD2
RGS1	S1PR1	ITM2B	GNL3	NCOA3	ASB2	TMSB10	BCL2	ISG15
EEF1A1	TMSB10	CCR2	APEX1	SLC39A1	S100A11	BCL2	CNOT3	USP18
MXD4	CRIP1	GLRX	PTMA	NOTCH2	EPCAM	TXK	LFNG	RTP4
LRRC32	ATP1B3	CTLA4	NHP2	PDCD4	IL1RL1	MS4A4A	NLRC3	OASL
KRBA2	MS4A4A	S100A6	NR4A1	C6orf47	MAF	IGFBP4	ARHGEF1	IRF7
CYBB	RASGRP2	S100A11	EIF5A	CBX3	LILRB4	SATB1	MS4A6E	OAS3
ITGAE	TSC22D3	TIMP2	NOP58	TMSB10	BICD1	LEF1	SSBP2	MX1
HOXB4	FAM65B	S100A4	NME1	MCMBP	S100A10	TPT1	PDCD4	CMPK2
SMC4	EMP3	SCCPDH	DDX21	ZSCAN26	ID2	ATP1B3	TSPAN32	ISG20
BCL2	TPT1	CXCR6	NCL	KLF13	ICOS	CMAHP	TXNIP	ZBP1
SSBP2	IL6R	IL10	NOLC1	WTAP	TTC39C	FAM65B	ANKRD44	IFI44
SESN3	LEF1	CCR5	MRTO4	PPP1R16B	CD81	KBTBD11	EVL	PHF11
ST8SIA4	STK38	MALAT1	PPA1	PIM1	HLA-A	ACTN1	TRAF3IP3	XAF1
IKZF4	TXK	PODNL1	MIF	KMT2D	TNFRSF18	ARHGEF1	KRBA2	PYHIN1
IFT80	SATB1	CAPG	EIF4A1	TUBB	IL7R	CYTIP	TRIM5	BST2
HLA-DOA	WDR89	SRGN	GAR1	SUPT16H	PENK	KRBA2	PAFAH1B1	SLFN5
SH2D1A	CYTIP	IL18R1	PA2G4	SRSF2	SHISA5	RASGRP2	MT-ND4	MS4A4A
EEF2	CDKN2D	LPAR6	METTL1	KDM6B	CD200R1	CDKN2D	ZDHHC20	DHX58
NPM1	BCL2	GBP3	HSPD1	ZC3HAV1	S100A6	RASA3	PURA	STAT1
LTB	KLF3	NEB	SET	CDKN1B	GPR55	SMC4	CRLF3	OASL
ITGA4	TMSB4Y	PRDM1	RANBP1	LRRC8A	B2M	EEF1A1	ST8SIA6	PARP14
LDLRAD4	ARL4C	NT5E	NIFK	KLF2	NEB	GPR146	RALBP1	EIF2AK2
SMPDL3A	PDLIM1	CCR4	TNFRSF9	B4GALT1	ITM2C	DGKA	CENPA	LGALS3BP
EVL	RASA3	RORC	NR4A3	KIAA0430	GATA3	STK38	TEX10	HERC6
TTC3	KRBA2	CCL20	TNFRSF4	KRBA2	RORA	BCL11B	ZCCHC11	DAXX
GPR83	KBTBD11	RNASE4	RAN	PAIP1	SERINC3	COX7A2L	ATF7IP	RNF213
TIAM1	TREML2	LGALS1	C1QBP	MYH9	CD74	EEF2	DDX58	IFITM3
PPM1M	FAU	PRG4	SHMT1	SKIL	PGLYRP1	IFT80	CHD3	DDX60
NACA	S1PR4	ASB2	SNRPD1	ALKBH5	PTPRCAP	CORO1A	GTF2I	SAMD9L
ATP5G2	CD7	SMCO4	HSPA5	FAU	ARL5A	RAMP1	ZNF652	SAMHD1
MGST2	SMAD7	LZTFL1	EGR1	KIAA1468	TNFRSF4	CCND3	VPS37B	SP100
IKZF2	SLC17A9	MMD	IFRD2	RBM15	WLS	ARHGDIB	GNB2L1	PARP9
MBNL1	GMFG	AHR	LYAR	PPM1H	MALAT1	ITM2A	ZFP36L2	PML
POU2F2	GNB2L1	PARD6G	RILPL2	COX7A2L	TNFRSF9	VPS37B	MLLT3	GBP7
IPCEF1	LFNG	PLAC8	ODC1	YME1L1	SAMSN1	ZDHHC20	MBNL1	IFIH1
YPEL3	ST8SIA6	S100A10	CYCS	S1PR1	CD3G	FOXP1	KLF2	MITD1
CCR9	PECAM1	B2M	HSPA9	MS4A4A	TTN	ETS1	BCL11B	DTX3L
EEF1B2	ARHGDIB	SDC4	PNO1	EEF1A1	TNFRSF1B	USP3	VPS41	IRGM
FYB	IL17RA	CTSB	NEFH	BCL2	CD83	SP100	SEC24A	STAT2
EIF3F	ADD3	MARCKS	RRP15	GSK3B	ZCCHC18	TCF7	CARD11	TRIM25
MT-CO1	TXNIP	PTMS	HSP90AA1	EVL	ABCB1	GNB2L1	IKZF4	LGALS9
PDCD4	ITGB7	AHNAK	PPAN	IGFBP4	GIMAP7	NDRG3	HP1BP3	IFI35
HLA-DMA	AVEN	FGL2	CDCA7	WHSC1L1	CST7	CHCHD10	FYB	UBE2L6
FAM169B	KLF13	VMP1	HK2	GNB1	EBI3	SLC38A2	ITPR2	DDX58
EEF1G	ABLIM1	EMB	TAGAP	PTPN18	MBNL1	SMC6	NIT1	MS4A6E
RAB37	COX7A2L	CD3G	FAM162A	GM2A	CD82	TRIB2	TREML2	HELZ2
PTPN22	SELPLG	MATK	NHP2L1	PAN3	FGL2	TECPR1	NRP1	CCND2
WDR89	SOCS3	IKZF3	DCTPP1	ARGLU1	ITGAE	CCR7	CAPN3	TRIM6-TRIM34
RHOH	KIAA0040	CRMP1	DUSP2	KDELR2	SRGN	FAU	LRRFIP1	SMCHD1
MS4A6E	EVL	ANGPTL2	EBNA1BP2	EEF2	ZFP36L1	RGS10	EIF4B	SLFN12
ANKRD12	CORO1A	LILRB4	ATP5G1	WDR89	PISD	CD27	GATA1	PSMB10
PTGER2	DGKA	LY6E	SRSF2	GNB2L1	IL18R1	TET3	ADD1	SP110
TGFBR1	PRKCQ	LAPTM5	WDR43	SELL	SH2D1A	TSC22D3	PIK3IP1	EPSTI1
NRP1	PIK3IP1	SUSD3	NOP56	SEMA4B	GIMAP1	KAT2B	ZBTB20	PSMB8
FAM189B	SH3BGRL3	PKP3	NDUFAF4	RAP2B	UBB	KLF3	RCBTB1	IRGM
RALBP1	VPS37B	RAPSN	TMA16	DPYSL2	BATF	SP110	FYCO1	C19orf12
TRAF3IP3	ARHGAP15	SOCS2	G3BP1	ETS1	ZDHHC2	TREML2	FAM78A	SELL
BCL11B	PTP4A3	CCR6	SERBP1	PCED1B	TOX	HMHA1	EEF1D	TAPBP
GPRIN3	SRPK1	CD3E	MRPL12	ZNF207	FTH1	ITGA6	S1PR1	TMSB10
INPP5F	HSD11B1	MYO1F	PGAM1	CORO1A	BTG1	BIN2	WDR82	USP25
GNB2L1	MSN	TNFRSF1B	ERH	RAC2	GPX4	PECAM1	DIDO1	OGFR
LPXN	SP100	MALT1	HNRNPAB	CFL1	PTPN13	STK26	IL6R	SHISA5
EIF3E	ARHGEF18	GRN	TIMM9	BMP2K	EMB	FOXN3	SETX	IRF9
H2AFZ	ID3	CKB	NSUN2	ARHGDIB	ITGB8	GPR83	SELL	TRIM56
APOBEC3B	CTB-133G6.1	PIM1	TPI1	TPT1	PDCD1	ARHGAP15	TARDBP	CASP8
ARL6IP1	ASS1	ARL5A	DKC1	RHOH	H2AFZ	IGF2R	IGF2R	GBP2
HSCB	GPR146	PTPRCAP	EIF2S1	YTHDF2	GPR183	ACP5	ZNF260	NAMPT
CYTH3	DDIT4	PTPN7	EEF1E1	TSPAN32	CD2	ANKRD44	SKAP1	TOR1AIP2
EIF3M	ACP5	TNFAIP8	TOMM40	PITPNC1	OSBPL3	PDCD4	PTPN18	LY6E
AP003419.11	HCST	N4BP1	SMYD5	SMC4	MYO1F	CYTH1	EEF1A1	PSMB9
FAU	RAMP1	SRRM2	MYBBP1A	HNRNPUL1	AHR	MS4A6E	NIPBL	HLA-E
SH3BGRL	CD47	NFIL3	HSPE1	TXK	GIMAP6	KIF21B	DENND1B	MOV10
IFI27	TSPAN32	FURIN	RRS1	TSC22D3	SMCO4	TSPAN32	MT-ATP6	TOR1AIP1
LIMD2	TECPR1	UBL3	IRF4	BIRC6	CD3D	PGS1	ATAD2B	ADAR
N6AMT2	TMEM71	AQP3	TIMM10	MS4A6E	CD53	CD1D	DNM2	RNF114
AKAP13	CRLF3	MAFG	PUS7	HMP19	S100A4	TRAF3IP3	PRPF39	ASB13
CCR7	NDRG3	NFATC1	C7orf50	PFN1	SDC4	MSN	KLHDC1	ETNK1
CAMK2D	SNRPD3	SLA	PRMT1	FAM65B	DAPP1	ST8SIA6	DMTF1	FAM111A
TBC1D4	BIN2	CD3D	CHCHD4	ANKRD44	CAPG	ME2	ZEB1	KLF2
EVA1B	PAG1	AGPAT4	PHB2	CNN2	SDF4	BTG2	KLF3	PARP11
ARHGAP9	PTPN18	LBH	PSME3	LIMD2	VMP1	RBMS1	SMC4	ZCCHC11
IGF2R	SSH2	NAV2	USP50	TACC1	SPOCK2	PDLIM1	NDRG3	ZC3HAV1
MT-ND4	AC025263.3	CD28	LTV1	SRRM2	AXL	BACH2	JAK1	CD47
PGS1	DPH5	EEA1	RSL1D1	RHOA	FAM129A	HMP19	RHOH	NCOA7
EEF1D	RCN1	CPD	TRMT61A	SET	GLIPR1	RGL2	SENP7	CNOT6L
PFDN5	CAST	ADAM19	CACYBP	ID3	CERS4	RSRP1	NUP153	CNP
SUPT4H1	BCL9L	F2R	NPM1	SEPT1	GIMAP1-GIMAP5	PIK3R1	KIAA0040	TRIM26
ZNRF1	PPDPF	ARHGAP31	PABPC1	RASGRP2	PTP4A2	PYCARD	ZNRF2	TREML2
IL16	CDC42SE1	HLA-A	PHB	PPDPF	CASP1	EMP3	IZUMO1R	TNFSF10
GIMAP7	FAM101B	PTPRC	NPM3	SATB1	M6PR	EEF1B2	ARHGEF18	PPA1
CTSS	ANKRD44	GM2A	ATAD3A	COTL1	LCP1	KDM7A	ESYT2	CMTR1
MT-CYB	RBMS1	SEPP1	PPP1R14B	LEF1	SON	GTF2I	STAG2	PARP10
GPI	HNRNPF	EHD1	NOP16	PECAM1	BCL2A1	RASGRP1	FAM76B	MORC3
NXPE3	GATA1	GLB1	ZNF593	FAM3C	TNFSF11	LFNG	PNN	TAP1
RAC2	CD55	SNX2	EIF5B	CDKN2D	FAM46A	TNRC6B	WBP11	PNPT1
ITGB2	CMAHP	CAMK2N1	KDM6B	PDLIM1	AHNAK	KCNN4	CD79B	ANKFY1
TPCN1	GALNT10	GPR155	GCSH	LFNG	SPCS2	ARHGAP4	REXO1	MSN
LTA	PITPNC1	TPR	TUBA1B	HNRNPF	RBM39	COMMD8	HMP19	TMBIM6
PIK3IP1	PDK1	ATP2B4	GRWD1	CD52	SMPDL3A	PIK3IP1	NCOA3	PTTG1
IFNAR2	IKZF1	CYFIP1	SLC7A5	JUND	CTLA4	NPC1	PIK3R1	C2orf15
GLTSCR2	PRKD2	LEPROTL1	HMGN1	IGF2R	PRDM1	RPRD2	AIDA	CLIC4
CST7	GRAMD4	TRIB2	PDCD11	ASS1	MT-CO1	QARS	SMARCA2	KEAP1
CD96	NRP1	TOX2	ST13	PPM1G	CASP4	CD9	COMMD8	AIDA
FAAH	VIM	TWSG1	SRSF7	TMF1	LAPTM5	FAM78A	RNF6	NMI
TSPAN3	TPM3	LAT	NUTF2	ZFP36L2	SLC22A15	GIMAP4	YPEL3	ZUFSP
MRPL52	MS4A6E	GPR183	PUSL1	RGL2	CD3E	RAC2	THY1	NLRC5
ZCCHC11	FXYD5	TMEM154	CCT3	CHCHD10	MT-CO3	TMEM71	ABLIM1	CEP57L1
SYP	ZFP36L2	SHISA5	CD83	PTP4A3	ADORA2A	SH3BP5	ATP2C1	TOR3A
PIGP	KCNAB2	CDK2AP2	ANP32B	EIF3E	RBL2	ATP11B	SUN2	CHMP4B
HMP19	SPTSSA	FRMD4B	NIP7	HMHA1	CHST2	TMEM64	KIAA1551	IFNAR1
IL2RB	ATP11B	FAM129A	HSP90AB1	UVSSA	FAM3C	PNRC1	PCED1B	EVL
HNRNPA1	FLT3LG	H1F0	RRP9	SLC17A9	EEA1	FAM169B	BRD9	ZNFX1
THY1	TMEM64	LCP1	GALK1	S1PR4	FKBP5	IKZF1	RP11-432B6.3	TPT1
ST6GALNAC3	ADD1	FXYD5	SHMT2	UBAC2	H3F3B	DPH5	CEP57L1	LGALS8
MT-ATP6	HMP19	LGMN	SLC19A1	GPI	LXN	MKLN1	COX20	TBC1D1
EIF3H	IKBKB	HSP90B1	SRSF6	LBH	YPEL3	TOP2B	RERE	SP140
PTPN18	FOXN3	IL12RB1	MAT2A	EIF3H	N4BP1	SMIM4	ZNF217	VCPIP1
EIF4B	CASP8	SDF4	EIF3J	CTSW	ITM2B	EVL	TMX2	PSME1
PMEPA1	EEF2	TMEM176A	SNRPF	CYTIP	CREM	CDC42SE1	SLAMF6	PSME2
ASXL2	CCDC141	MDFIC	PSMA7	BTG2	STX11	GALNT6	MT-CYB	RBM43
PLEKHA1	IFNAR1	SARAF	UQCC2	MED1	PODNL1	ABLIM1	GRAMD1A	GIMAP4
NDUFA6	HMHA1	SDCBP2	SSSCA1	KBTBD11	CAMK2N1	ARHGEF18	ZFYVE27	USF1
ST8SIA1	ECM1	VAMP8	BANF1	EMP3	PRR13	SF3B1	STK38	TRAFD1
USE1	KLHDC1	CD4	CDV3	DGKA	LTB	ADD1	ZMYND8	MAX
ZBTB20	NPC2	RORA	SRSF3	ABLIM1	ARHGAP31	PYHIN1	ZNF326	TSPO
MT-ND5	C16orf54	HIF1A	LAP3	CTSE	PKP3	DDIT4	AKNA	IRF2
ABHD8	FLNA	UCP2	GPATCH4	EEF1G	GNAS	NAPG	SENP1	APOBEC3B
UTRN	KLHL6	SLAMF1	CCDC86	SP110	DDX5	TXNIP	NCOA2	HLA-G
SP140	FAM69A	PTPN22	UTP18	HCST	NFKBIA	RASAL3	TPCN1	PRKCQ
CCND3	SMC6	PISD	RCL1	TRA2B	MIF4GD	ST8SIA1	ZC3H13	ASCC3
DHRS3	CYTH1	AEBP2	EIF2S2	C1orf43	IER5	KLF7	ARMC10	MYCBP2
TWF2	ARHGEF1	PRR13	NFKBIA	SKAP1	ANKRD12	WDR89	ARFGEF1	PDCD10
NCOA7	RABAC1	TMSB4Y	LDHA	FLI1	GNAQ	AFF3	FAU	TCOF1
BTF3	EEF1A1	PHACTR2	RPF2	HSD11B1	PTGER4	CASP8	TBK1	FAM26F
ATP5C1	SMCHD1	LRBA	ORAI1	PDK1	SRRM2	LIMD2	CMAHP	GRAMD3
STAT1	AES	HIC1	HDGF	NRAS	TNFAIP8	WASF2	C21orf33	SEPW1
SMAP1	FAM102A	GLCCI1	FABP5	HNRNPR	UNC119	NCOA3	XPO1	GMFG
ST6GAL1	ITGA6	RBM39	EIF1AY	FXYD5	RINL	ZNRF1	GLS	CTSS
HADH	GIMAP4	GPR68	POLR2H	RBM4B	RILPL2	FAM102A	KIAA1468	LIPA
FOXP1	TBC1D1	RNASET2	DDX18	SIT1	SH3BGRL	PDK1	THAP3	TAP2
CBX6	SPTBN1	LAMC1	UNG	LAT	ZBTB38	NPC2	TSPAN13	PHIP
CHD3	CCDC22	C9orf3	CD3EAP	DDIT4	NT5E	CEP97	FUS	ATP1B3
HDGFRP3	SAMHD1	ITGAE	FBL	NOP10	SYTL2	MAP4K2	PRPS2	RABEPK
LRIG1	EEF1B2	AGFG1	EIF4E	KLHL9	STAP1	SLAMF6	SYNRG	CMC1
ZNF706	BACH2	GIMAP7	PDCD1LG2	IFT80	CD44	SLFN12	IFT80	PITPNC1
MPST	DTX1	TPST2	MAK16	ARHGAP9	PIM1	PPDPF	GPS2	SCML4
NRIP1	CFL1	CRLF2	DDX27	RNF167	ATP2B4	STAG1	WIPF1	DDX24
TASP1	IER2	UBB	DDX39A	VASP	CRLF2	RB1CC1	CNOT1	C19orf66
TIGD2	GLTSCR2	ST6GALNAC3	MRPL17	AES	EIF1	PBX2	SLC35B3	CD7
GBP4	JAK1	BTG1	SNRPA1	THY1	CDK2AP2	CTC-432M15.3	EIF4A2	COX7A2L
MT-CO3	KLF7	CUX1	CD69	MT-ND1	SEC62	KLHL6	RFWD2	NPC2
ARHGEF1	PPP2R5A	TP53INP1	FTSJ3	TNFAIP8L2	BCL2A1	PLCXD2	SMPDL3A	ADRB2
SARAF	PHF20L1	IRF4	EMC6	INPP4A	MORF4L1	GDI1	ZC3H6	IL2RG
TRIM5	STK10	PON2	YBX3	SOCS1	SLC26A2	CHURC1	RSBN1L	CD69
TMEM106B	SP110	CMTM7	RUVBL1	ACTR2	MATK	SOCS3	SAFB2	CLEC2D
IL2RA	KIAA1551	GIMAP1	SNRPB	ABCG1	TOX2	KIAA0040	SLC12A6	ARID5A
CCT4	CNP	CCR9	PDAP1	FOXN3	MT-ND2	PRKCQ	RSU1	UBA7
C19orf12	MACF1	VAMP5	IER2	GLTSCR2	CALM2	CTC-487M23.8	CLK3	FAM65B
ITPR2	EEF1G	TMEM176B	MRPL20	CMAHP	HMGB1	ZNF322	VPS13A	SOCS1
LYSMD2	PLEC	KIAA1958	GSPT1	ATP11B	DST	MTMR3	GLTSCR2	HLA-A
IGBP1	MARK2	SLC43A2	SMS	N6AMT2	NR3C1	ARL4C	TBCC	CYTIP
CDC42SE2	GRK6	FNBP1	GTPBP4	PPP1R18	AP000721.4	TIA1	PHF3	PECAM1
PSTPIP1	PARP11	ID2	NOP2	RASSF2	SDCBP2	CD47	SRPK2	PRRC2C
ABCB9	WHSC1L1	RCBTB2	NOP10	CD47	PBXIP1	SRPK1	CTCF	PTPN18
CIR1	ZDHHC20	GIMAP4	YBX1	ZNF260	NSMAF	CNN2	EIF3E	CD274
TRPC4AP	USP3	VPS54	RRP1B	PHF1	ARL6IP1	SMCHD1	HELZ	AZI2
CD79B	MAT2A	SLC16A6	CDK4	DTX1	AHI1	RBM38	GGNBP2	TNRC6B
MNAT1	PIK3R1	ARL4C	LSM2	RGS10	MT-CYB	GNAI2	PPP3CA	GBP4
CYTH4	REXO2	ARPC1B	TOMM5	GATA1	KANSL1L	WHSC1L1	CTC-432M15.3	SKAP1
COX7A2L	CCND2	GADD45B	BZW1	SELPLG	DNASE2	MT-ATP6	YTHDC1	IGFBP4
KLK8	TET3	UBASH3B	RGS16	PRKCQ	ATRX	IL17RA	EPC2	NDRG3
EHD3	SH3BP5	PRKAR1A	IRF8	RBMS1	DUSP1	GRAMD1A	CIZ1	FAU
ASAP1	RSRP1	MBNL1	WDR12	CCDC22	CD38	SKI	AP003419.11	GBP5
WDR82	RHOH	PLA2G16	C1orf131	PPT1	TMEM154	PICALM	CD2AP	MAP2K1
TRAPPC6A	CTSW	MYL6	EIF3B	IL6R	GBP7	ZNF865	KLHL6	SLCO3A1
PAIP2	FOXP1	SLC29A1	BCL2A1	GRAMD1A	CLIC1	ARID1A	USP9X	NT5C3A
ZMYND8	FOXO1	RAB11A	SYNCRIP	EIF3K	FRYL	PTPN18	EP400	DGKA
UPF3B	SEPT1	RNF149	WDR18	SNRPG	SERPINB6	MCMBP	MED13L	DENND1B
IFNGR1	NME2	CD247	BOLA2	SP100	GPR68	UGCG	CCDC25	CCND3
NFAT5	IGF2R	FKBP1A	REL	UBE2D2	CYFIP1	ECM1	PPT1	KIAA1551
ADAM19	CDIPT	BATF	PRPF19	ZMAT5	HPGDS	ARID5B	PITPNM1	IRF1
RASSF5	DOCK2	GNG2	SNRPD2	NACA	NMB	C3orf38	TRRAP	CDKN2D
RAB11FIP2	RAP1B	UBL5	NUDC	PPIA	SYT11	SNAPC3	SLC6A6	CTSW
DST	LDHA	STK17B	U2AF1	OTUB1	GIMAP4	CHD3	INIP	S1PR1
EIF3K	SPN	LCK	BATF	ARHGAP15	MT-CO2	SENP7	SMC6	TBK1
CTSW	DEF6	RINL	FKBP4	EIF3F	PTPN7	FYB	SMAD7	B2M
BIN1	NPM3	F2RL1	GART	C16orf54	BHLHE40	TRIM6-TRIM34	ROCK1	SLC30A7
TSPAN13	PIM1	ZAP70	FDX1L	BTF3L4	ARL4A	PBRM1	GATA3	CMAHP
SASH3	SETX	IPCEF1	NAA50	AC104534.3	ANXA11	IKZF5	ACAT1	TMEM192
ARL5C	SKI	SPCS2	UCHL3	PSTPIP1	CEBPB	ZBTB11	IKZF5	C5orf56
PANX1	SLC44A2	NCMAP	RSL24D1	MT-CYB	AKAP13	BNIP3L	C11orf31	PHF1
INPP4B	LAMTOR2	ELK3	ST6GALNAC4	ANP32A	ASXL2	CHMP3	ELK4	FOXN3
P2RX7	AHCYL2	ITGAL	POLR2L	ADD3	GLRX	FAM189B	AKAP13	USP38
GLTP	SIT1	MICAL1	TIMM13	RAMP1	LPAR6	TNIK	RGS1	ITK
NSA2	CD9	ETS1	ETF1	WDYHV1	YTHDC1	MGST2	GATAD2B	SLC38A2
CTC-432M15.3	TTC13	TMBIM6	NDUFAB1	RCN1	EVA1B	EIF3K	MPP1	CD164
UQCRHL	RBM38	DNASE2	AIMP2	ARHGAP25	TMEM191B	BOD1L1	CCNY	KLF3

## Sheet: b
Table S2b. List of genes expressed more highly in Klf2– versus Klf2++ cluster and vise-versa used for metascape analysis in Figure 3e.
Higher in Klf2–	Higher in Klf2++
Izumo1r	Crip1
Itgae	Klf2
Maf	Sell
Rgs10	Tmsb10
Ctla4	S1pr1
Tbc1d4	Igfbp4
Rgs1	Atp1b3
Cybb	Tmsb4x
Sh2d1a	Rasgrp2
Mmd	Fam65b
Mxd4	Emp3
H2afz	Txk
Ikzf2	Tsc22d3
Cst7	Satb1
Hoxb4	Arl4c
Ptpn22	Tpt1
Ccr9	Il6ra
Capn3	Stk38
Tspan3	Ms4a4b
Itga4	Lef1
Cd83	Cytip
Lztfl1	Sh3bgrl3
Smpdl3a	Pim1
Tiam1	Gmfg
Tgfbr1	Cfl1
Gapdh	Calm1
St8sia4	Pfn1
Pou2f2	Cdkn2d
Nt5e	Rasa3
Malat1	Klf3
Ldlrad4	Fxyd5
H2-Oa	Itgb7
Ankrd12	Ccnd2
Atp5g2	Tpm3
Gprin3	Hnrnpf
Ltb	Lgals1
Apobec3	Arhgdib
Mbnl1	S1pr4
Sh3bgrl	Tagln2
Sesn3	Pdlim1
Dhrs3	Cd47
Adam19	Msn
Icos	Smad7
Vmp1	Add3
Glrx	Ppdpf
Gimap7	Klf13
Susd3	Hsd11b1
Prr13	Snrpd3
Lrrc32	Ldha
Dst	Ier2
Ipcef1	Rap1b
H2-DMa	Pecam1
Cd3g	Il17ra
St6galnac3	Mat2a
PISD	Selplg
Lag3	Hcst
Ikzf4	Kbtbd11
Arl6ip1	Vim
Ttc3	Npc2
Hivep3	Srpk1
mt-Co1	Lfng
Rnf149	Pitpnc1
Ctss	Ablim1
Tnfrsf4	Tpm4
Sec11c	Cdc42se1
Ssbp2	Rbms1
Hnrnpa1	4930523C07Rik
Npm1	Coro1a
Hif1a	Gimap4
Cd44	Smchd1
Bcl2a1b	Ptp4a3
Cd3d	Dynll1
Ctsb	Spn
Shisa5	Cd2
Tnfrsf1b	Bin2
Timp2	Ass1
Ncoa7	Sp100
Lpxn	Cdc42
Rab37	Crlf3
Itgal
Pabpc1
Mrpl52
Agfg1
Nap1l1
mt-Cytb
Pmepa1
Mdfic
Nrip1
Ubb
Itm2b
Ifi27
Stat1
Ybx1
Fam3c
Camk2d
Pigp
Supt4a
Txn1
Itm2c
Ypel3
Pfdn5
Cd3e
Ucp2
Pold4
Smc4
Cox8a
Anp32b
Il2ra
Fundc2
Btf3
Ptprcap
Eva1b
Akap13
Gpr83
Luc7l2
Cish
Socs2
S100a11
Atpif1
Gdi2
Ralbp1
Itgb2
Gpi1
Tomm7
Prdx2
Nfkb1
Cd28
Hn1
Zfp706
Fam169b
Hsp90ab1
Srrm2
Ift80
Sec61g
Slc25a4
Eif4b
Asxl2
Kcnq1ot1
Tnfsf8
2700060E02Rik
Gnas
Limd2
Clic1
Vamp8
Gabarap
Cdk2ap2
Atp5c1
Tubb5
Hspe1
Capg
Hmgb2

## Sheet: c
Table S2c. Top 100 significantly enriched pathways by Metascape based on top 200 genes more highly expressed in indicated cell type compared to all other cell types. Shown are log10 pvalues.
GO	Description	Klf2–	Klf2++	Maf	Mif	Ncoa3	Ikzf2	Klf2+	Vps8	Ifn
GO:0046649	lymphocyte activation	-6.22017	-9.62466	-26.4109	-2.02662	-6.82007	-23.5634	-10.3676	-5.63919	-7.51719
GO:0002263	cell activation involved in immune response	0	-10.1733	-15.8223	-2.66312	-10.8935	-7.29634	-6.63192	0	0
GO:0034341	response to interferon-gamma	-2.49011	-3.99618	-2.46871	0	-3.98102	0	-2.49011	0	-31.6673
GO:0022613	ribonucleoprotein complex biogenesis	0	0	0	-53.1695	0	0	0	-2.92413	0
GO:0002683	negative regulation of immune system process	-2.06329	-4.92114	-10.1603	-2.03634	-3.07502	-15.7331	0	0	-7.80153
GO:0001819	positive regulation of cytokine production	-5.2181	-2.74786	-8.95036	-5.86642	0	-8.20761	-2.74786	-2.76408	-11.6211
GO:0007015	actin filament organization	-2.94063	-11.2208	-4.77254	0	-8.57931	-2.39464	-6.24664	-4.1766	0
GO:0034340	response to type I interferon	0	-2.26616	0	-3.13357	0	0	0	0	-46.0516
GO:0030099	myeloid cell differentiation	0	-4.18395	-4.80398	-2.38559	-4.82713	-7.84085	-6.28433	0	-4.18395
GO:0045088	regulation of innate immune response	-3.34099	-2.25154	-3.30434	-2.22373	0	0	-2.25154	-2.7917	-25.1249
hsa05162	Measles	-6.69621	-6.69621	-2.24809	0	-3.01754	-2.26626	-3.86013	-3.04021	-17.4109
GO:0043900	regulation of multi-organism process	-4.22231	-4.22231	-2.41172	0	-3.56945	0	-3.58825	-3.60718	-19.3411
GO:0046632	alpha-beta T cell differentiation	-2.16224	-3.95831	-8.31368	-2.14713	-3.00939	-8.35563	-4.96885	-3.02896	-3.01914
GO:0048872	homeostasis of number of cells	-2.61205	-4.79634	-5.57559	0	-6.45666	-4.79634	-3.28921	-2.62434	-2.61205
GO:0010035	response to inorganic substance	-4.85224	-4.23995	0	-2.0975	-2.58364	-3.65931	-4.85224	-2.61757	-2.12679
GO:0010942	positive regulation of cell death	-3.02403	-3.02403	-3.46802	-4.52642	-3.49125	-4.03455	-4.03455	-2.15342	0
GO:0051345	positive regulation of hydrolase activity	-3.31365	-4.89683	-2.36495	-2.36495	-3.7888	0	-6.08138	-2.00942	-2.40164
GO:0050900	leukocyte migration	0	-8.22718	-3.42516	0	-5.29987	-5.32659	-6.00996	0	0
GO:0061572	actin filament bundle organization	0	-7.57101	-2.92292	0	-3.74665	0	-5.56572	-3.7736	0
GO:0045058	T cell selection	-2.29626	-2.29626	-11.749	0	0	-7.27415	-4.60342	-4.61396	0
GO:0071396	cellular response to lipid	-2.01776	-3.5011	-2.44222	-2.93298	-5.90938	-5.93974	-2.01776	-2.03229	0
ko04659	Th17 cell differentiation	-4.94205	-2.14805	-14.7938	-2.13297	0	-4.94205	0	-2.15566	0
GO:0007265	Ras protein signal transduction	-3.06469	-5.89066	0	0	-6.66369	0	-8.38708	-2.47944	0
GO:0051098	regulation of binding	0	-4.87055	-3.47198	-2.28813	-4.14914	-2.31397	-2.88719	-3.52416	-3.50665
GO:0022618	ribonucleoprotein complex assembly	-2.9977	0	0	-20.4982	-2.35356	0	0	-3.01184	0
GO:0009636	response to toxic substance	-5.95562	-4.01062	0	0	-3.98859	-2.87995	-3.42735	-2.89759	0
GO:0032609	interferon-gamma production	-2.86107	0	-5.74101	-2.84183	0	-8.01029	-3.76379	0	-4.73734
hsa05200	Pathways in cancer	-4.79019	-5.42702	-2.52645	0	-4.15973	0	-4.79019	0	-2.55994
GO:0002695	negative regulation of leukocyte activation	0	-2.69135	-8.02367	0	0	-9.1262	0	0	-2.69135
GO:0097190	apoptotic signaling pathway	0	-3.89875	-2.32428	0	-3.33009	-5.0872	-5.0872	0	-2.83621
GO:0009617	response to bacterium	-2.53952	-2.11485	-3.95013	0	0	-4.00124	0	0	-7.64822
GO:1903311	regulation of mRNA metabolic process	0	0	0	-9.27029	-6.70943	-3.0912	0	-3.75793	-3.7401
GO:0006412	translation	-4.65584	0	0	-15.5358	-3.55278	0	0	-2.19778	0
ko04612	Antigen processing and presentation	0	0	-3.63732	-2.6425	0	0	0	0	-9.74156
GO:0045936	negative regulation of phosphate metabolic process	-2.88423	-3.40461	-3.36297	0	-3.93508	0	-3.40461	-3.42566	0
GO:0071349	cellular response to interleukin-12	0	-5.89966	-2.28415	-3.38035	-5.88694	0	-3.39683	0	-2.29626
GO:0007249	I-kappaB kinase/NF-kappaB signaling	-2.35719	-2.35719	-4.36383	0	0	-4.40075	0	-4.41939	-3.67065
GO:0007163	establishment or maintenance of cell polarity	-2.97342	-6.23927	0	0	-6.21757	0	-2.97342	-2.98617	0
GO:0060759	regulation of response to cytokine stimulus	0	-4.93715	0	0	-2.54383	0	-2.55464	-2.56552	-10.9456
GO:0000904	cell morphogenesis involved in differentiation	-2.11918	-5.1253	0	0	-7.61849	0	-4.00787	-4.58147	0
ko04670	Leukocyte transendothelial migration	-4.76203	-3.78453	0	0	-5.78595	0	-4.76203	-2.06048	0
GO:0042113	B cell activation	0	0	-6.93478	-2.0205	0	-5.37339	-2.61486	-2.05442	0
GO:0051235	maintenance of location	-3.95108	-2.07056	-6.17395	0	-3.26018	0	0	-2.082	-2.07056
GO:1902106	negative regulation of leukocyte differentiation	0	-2.17658	-7.1717	0	0	-7.20911	0	0	0
GO:0009611	response to wounding	0	-3.77537	-5.43041	0	-6.08389	-3.26011	0	0	0
M272	PID CD8 TCR DOWNSTREAM PATHWAY	0	0	-7.67758	0	0	-9.07661	0	0	-5.1691
GO:0007568	aging	-3.32442	0	0	-3.29288	0	-2.68936	0	-2.11712	-3.32442
M34	PID TCR PATHWAY	0	-4.00652	-11.9209	0	-2.92244	0	-2.93051	0	0
M124	PID CXCR4 PATHWAY	-2.23561	-6.20337	-6.17039	0	-2.22798	0	-2.23561	0	0
GO:0001818	negative regulation of cytokine production	0	0	-2.84082	0	0	-4.14784	-2.3001	-2.31313	-7.15835
M66	PID MYC ACTIV PATHWAY	0	-2.61763	0	-18.4384	0	0	0	0	0
GO:0032103	positive regulation of response to external stimulus	-2.52738	0	-3.10505	0	0	-3.13605	-3.13605	0	-4.48967
GO:0097028	dendritic cell differentiation	0	0	-6.04059	0	0	-3.50305	0	0	-2.37364
GO:0018212	peptidyl-tyrosine modification	0	-2.80732	-2.22005	0	-2.23279	-4.06546	0	-2.25855	0
GO:0045596	negative regulation of cell differentiation	0	-2.89982	-4.91928	0	-3.85847	-4.41824	0	-2.47171	0
GO:0051169	nuclear transport	0	0	0	-18.0385	0	0	0	-2.40535	0
GO:0072678	T cell migration	0	-5.09205	-5.06715	0	0	0	-3.94359	0	0
GO:0032606	type I interferon production	0	0	0	-2.65246	0	0	0	-2.68095	-15.059
GO:0070482	response to oxygen levels	-2.67046	0	-3.22413	-2.64098	-3.86873	0	0	0	-2.67046
ko04621	NOD-like receptor signaling pathway	-5.43759	-2.86534	0	0	0	0	0	-2.14365	-9.55148
hsa04514	Cell adhesion molecules	0	-3.11626	-5.80281	0	0	-3.96473	0	0	-3.11626
GO:0006909	phagocytosis	-2.21899	-2.77616	-2.19351	0	-4.00564	-2.21899	-3.37937	0	0
hsa05160	Hepatitis C	0	-2.87843	0	-2.12726	0	0	0	-2.15419	-11.8782
GO:0080135	regulation of cellular response to stress	-2.86833	0	0	0	0	0	-4.93407	-2.02996	-6.75514
GO:0006397	mRNA processing	0	0	0	-10.8502	-3.74286	0	0	-3.7862	0
GO:0008285	negative regulation of cell proliferation	0	0	-2.34212	0	0	-2.37867	0	-2.39717	-3.78276
ko04640	Hematopoietic cell lineage	-2.29744	-4.1726	-2.28212	0	0	-5.22368	0	0	0
ko04060	Cytokine-cytokine receptor interaction	-3.85706	0	-6.20565	0	0	-3.85706	0	0	0
GO:0045185	maintenance of protein location	0	-3.27707	-2.34689	0	-3.26715	0	0	0	-4.27518
GO:0002479	antigen processing and presentation of exogenous peptide antigen via MHC class I, TAP-dependent	0	0	0	0	0	0	0	0	-12.7028
GO:2000106	regulation of leukocyte apoptotic process	0	0	-2.46841	0	0	-3.43362	-3.43362	0	-2.484
ko04210	Apoptosis	0	-2.51524	0	-2.49658	0	0	0	0	-3.33716
GO:0060760	positive regulation of response to cytokine stimulus	0	0	0	0	0	-3.14543	0	-2.11928	-9.60609
ko04142	Lysosome	0	0	-3.58156	0	-2.72265	0	0	0	-2.7322
hsa05167	kaposi sarcoma-associated herpesvirus infection	0	0	-3.29161	0	0	0	0	0	-7.81513
ko04145	Phagosome	-2.31289	0	0	0	0	0	0	0	-3.08667
GO:0070201	regulation of establishment of protein localization	-3.33918	0	-2.35252	-2.35252	0	-2.84682	0	0	0
GO:0060330	regulation of response to interferon-gamma	0	-3.14591	0	0	-3.13957	0	0	0	-7.73578
GO:0002831	regulation of response to biotic stimulus	-3.1923	0	-2.3797	0	0	0	0	-2.40745	-5.96012
GO:0071706	tumor necrosis factor superfamily cytokine production	-2.70324	-2.00445	0	0	0	0	-2.70324	0	-4.29634
GO:0070997	neuron death	0	0	-2.34446	-3.54735	-2.93793	0	0	-2.38366	0
GO:0032633	interleukin-4 production	0	0	-2.70186	-2.70186	0	-3.97037	0	0	-3.97037
GO:0006753	nucleoside phosphate metabolic process	-4.20594	0	0	-4.15397	0	0	0	-2.26612	0
GO:0001773	myeloid dendritic cell activation	0	-2.9539	-4.28231	0	0	-2.9539	0	0	0
ko04380	Osteoclast differentiation	-2.62726	-3.47554	0	0	0	0	0	0	-3.47554
GO:0034612	response to tumor necrosis factor	0	0	0	0	0	-5.48299	0	0	-3.31464
GO:0031331	positive regulation of cellular catabolic process	0	0	0	0	-2.70026	0	0	-5.35901	-4.62204
GO:0045824	negative regulation of innate immune response	0	0	0	0	0	0	0	0	-12.2063
GO:0035456	response to interferon-beta	0	0	0	0	0	0	0	0	-12.0461
ko04064	NF-kappa B signaling pathway	0	0	-3.21506	0	0	-2.32948	0	0	0
GO:0044257	cellular protein catabolic process	0	0	0	0	0	0	0	0	-8.59631
GO:0071353	cellular response to interleukin-4	0	0	0	-4.10945	0	0	-2.82796	0	-4.12635
GO:1903827	regulation of cellular protein localization	0	-2.72067	-2.68645	-2.20175	0	0	-3.2478	0	0
GO:0051701	interaction with host	0	0	-2.32738	0	0	0	0	0	-4.60236
GO:1990823	response to leukemia inhibitory factor	0	-3.19352	0	-7.47314	0	0	0	0	0
GO:0019722	calcium-mediated signaling	0	0	-10.1133	0	0	0	0	0	0
GO:0035455	response to interferon-alpha	0	0	0	0	0	0	0	0	-10.0699
M10	PID BCR 5PATHWAY	0	-2.98135	-2.96521	0	0	0	0	-2.98949	0
GO:0001522	pseudouridine synthesis	0	0	0	-8.67122	0	0	0	0	0
GO:0032743	positive regulation of interleukin-2 production	0	0	-7.5984	0	0	0	0	0	0
